# Supplementary material
Source: PubMed Central journal article supplement (PMC3816122)
Supplement: NIHMS484541-supplement-1_si_001.pdf [file NIHMS484541-supplement-1_si_001.pdf]

# Synthesis of a Library of “Lead-Like” $\gamma$ -Lactams by a One Pot, Four-Component Reaction

*Kevin S. Martin, Michael Di Maso, James C. Fettinger, Jared T. Shaw\**

Department of Chemistry, One Shields Ave, University of California, Davis, CA 95616

[jtshaw@ucdavis.edu](mailto:jtshaw@ucdavis.edu)

## Supporting Information

S1-S2 Materials and Instrumentation  
S3-S20 Experimental Procedures  
S21-S62 <sup>1</sup>H and <sup>13</sup>C NMR Spectra  
S63-S71 Crystallographic Data  
S72 Computational Analysis

**Materials:** Unless otherwise specified, all commercially available reagents were used as received. All reactions using dried solvents were carried out under an atmosphere of argon in flame-dried glassware with magnetic stirring. Dry solvent was dispensed from a solvent purification system that passes solvent through two columns of dry neutral alumina.

**Instrumentation:** <sup>1</sup>H NMR spectra and proton-decoupled <sup>13</sup>C NMR spectra were obtained on a 300, 400 or 600 MHz Varian NMR spectrometer. Chemical shifts ( $\delta$ ) are reported in parts per million (ppm) relative to TMS ( $\delta$ , " 0). Multiplicities are given as: s (singlet), d (doublet), t (triplet), dd (doublet of doublets), m (multiplet), br m (broad multiplet), brs (broad singlet). <sup>13</sup>C NMR chemical shifts are reported relative to CDCl<sub>3</sub> ( $\delta$ , " 77.4) unless otherwise noted. High resonance mass spectra were recorded on positive ESI mode in methanol or acetonitrile. Melting points were taken on an EZmelting apparatus and were uncorrected. Infrared spectra were taken on a Bruker Tensor 27 spectrometer. Chromatographic purifications were performed by flash chromatography with silica gel (Silicycle, 40–63  $\mu$ m) packed in glass columns. The eluting solvent for the purification of each compound was determined by thin layer chromatography (TLC) on glass plates coated with EMD silica gel 50 F254 and visualized by ultraviolet light. Purification of library members using basic conditions via

preparative chromatography was achieved utilizing a Waters X-Bridge C18 column (19 x 150mm, 5!m, w/ 19 x 10mm guard column) at a flow rate of 20 mL/min. Samples were diluted in DMSO and purified using an elution mixture of water (pH 9.8 with NH<sub>4</sub>OH) and CH<sub>3</sub>CN, running a concentration gradient which increased by 20% CH<sub>3</sub>CN over a 4 minute period. The corresponding preparative gradient, triggering thresholds, and UV wavelength were selected based on the HPLC analysis of each crude sample. Analytical analysis after preparative chromatography utilized a Waters Acquity system with UV-detection and mass-detection (Waters LCT Premier). The analytical method conditions included a Waters Aquity BEH C18 column (2.1 x 50mm, 1.7!m) and elution with a linear gradient of 5% water (pH 9.8 with NH<sub>4</sub>OH) to 100% CH<sub>3</sub>CN at 0.6 mL/min flow rate. Purity of each sample was determined using UV peak area detected at 214nm wavelength. Purification of library members using acidic conditions via preparative chromatography was achieved utilizing a Waters Atlantis Prep T3 (19 x 150mm, 5!m, w/ 19 x 10mm guard column) at a flow rate of 20 mL/min. Samples were diluted in 50:50 CH<sub>3</sub>CN:water and purified using an elution mixture of water (0.05% formic acid) and CH<sub>3</sub>CN, running a concentration gradient which increased by 20% CH<sub>3</sub>CN over a 4 minute period. The corresponding preparative gradient, triggering thresholds, and UV wavelength were selected based on the HPLC analysis of each crude sample. Analytical analysis after preparative chromatography utilized a Waters Acquity system with UV-detection and mass-detection (Waters LCT Premier). The analytical method conditions included a Waters Aquity HSS T3 C18 column (2.1 x 50mm, 1.8!m) and elution with a linear gradient of 1% water (0.01% formic acid) to 100% CH<sub>3</sub>CN at 0.6 mL/min flow rate. Purity of each sample was determined using UV peak area detected at 214 nm wavelength. The following abbreviations are used throughout: acetonitrile (ACN), room temperature (rt), ethyl acetate (EtOAc), methanol (MeOH), ethanol (EtOH), isopropanol (i-PrOH), tert-butanol (t-BuOH), diisopropylethylamine (DIPEA), N,N-dimethylformamide (DMF), tetrahydrofuran (THF), and dichloromethane (DCM).

## Experimental Procedures

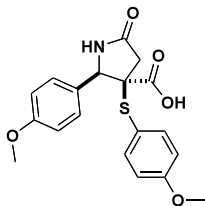

**(15).** Ammonium acetate (2.31 g, 30.0 mmol), maleic anhydride (2.94 g, 30.0 mmol), *p*-anisaldehyde (3.66 mL, 30.0 mmol), *p*-methoxybenzenethiol (3.7 mL, 30.0 mmol), and toluene (40 ml) were combined in a round bottom flask and the mixture was refluxed under argon with a dean stark trap for 24 hr. The reaction was allowed to cool to room temperature and white and orange precipitate was collected by gravity filtration. Rinsing of the solid with cold methanol yielded a clean white powder of the major diastereomer (5.04 g, 45%): mp 260-263 °C; <sup>1</sup>H NMR (400 MHz, *d*-DMSO) δ 13.20 (s, 1H), 8.33 (s, 1H) 7.29 (d, *J*=7.4 Hz, 2 H), 7.17 (d, *J*=7.5 Hz, 2H), 6.91 (d, *J*=8.8 Hz, 2H), 6.84 (d, *J*=8.8 Hz, 2H), 5.11 (s, 1H), 3.73 (s, 3H) 3.70 (s, 3H), 2.77 (d, *J*=16.9 Hz, 1H), 2.44 (d, *J*=17.1 Hz, 1H); <sup>13</sup>C NMR (151 MHz, DMSO-*d*<sub>6</sub>) δ 174.0, 173.5, 161.1, 160.0, 138.5, 130.2, 129.5, 121.4, 115.2, 113.9, 62.9, 61.3, 55.9, 55.8, 40.9; IR (neat) 3197, 1722, 1672, 1668, 1248 cm<sup>-1</sup>; HRMS (ESI) *m/z* calcd for C<sub>19</sub>H<sub>19</sub>NO<sub>5</sub>S (M+H)<sup>+</sup>374.1057, found 374.1060.

**General Experimental A: Formation of amides 18{1-3}.** Acid **15** was added to a round bottom flask and dissolved in benzene. Thionyl chloride was added dropwise at 0 °C. The reaction was then heated to reflux for 2-8 hours until all starting material was consumed. Benzene was then removed *in vacuo* to yield the acid chloride as a brown foam. The acid chloride was immediately dissolved in DCM (0.1M) and cooled to 0 °C in an ice bath. A primary or secondary amines **26{1-14}** (2 equiv) was then added dropwise at 0 °C and reaction was allowed to warm to room temperature overnight. After 24 h, DCM was removed *in vacuo* and the residue was taken up in EtOAc and water and the layers were separated. The aqueous layer was extracted twice more with EtOAc. The combined organic fractions were dried over Na<sub>2</sub>SO<sub>4</sub>, filtered and concentrated. Purification by flash column chromatography afforded the desired NH γ-Lactam products **18** in 29-86% yield.

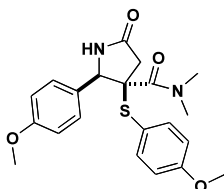

**18{1}.** The title compound was prepared from **15** (2.0 g, 5.36 mmol) according to general experimental A. Flash column chromatography with 50%-100% EtOAc:hexanes afforded **18{1}** as a brown to white solid (1.23 g, 57%). mp 191-194°C; <sup>1</sup>H NMR (600

MHz, CDCl<sub>3</sub>) δ 7.42 (d, J=8.7 Hz, 2H), 6.87 (d, J=8.9 Hz, 2H), 6.85 (s, 1H) 6.72 (d, J=9.0 Hz, 2H) 6.60 (d, J=9.0 Hz, 2H) 5.37 (s, 1H), 3.80 (s, 3H), 3.69 (s, 3H), 3.36 (bs, 3H), 3.27 (d, J=17.1, 1H), 2.86 (bs, 3H) 2.78 (d, J=17.0, 1H); <sup>13</sup>C NMR (151 MHz,) δ 174.2, 169.4, 160.3, 159.8, 136.4, 130.3, 129.1, 121.0, 114.2, 113.5, 63.4, 61.6, 55.3, 55.2, 43.1, 39.2, 37.8; IR (neat) 3255, 2957, 1709, 1666, 1625 cm<sup>-1</sup>; HRMS (ESI) *m/z* calcd for C<sub>21</sub>H<sub>24</sub>N<sub>2</sub>O<sub>4</sub>S (M+H)<sup>+</sup> 401.1530, found 401.1527.

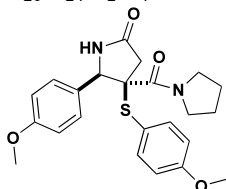

**18{2}**. The title compound was prepared from **15** (1.167 g, 3.13 mmol) according to general experimental A. Flash column chromatography with 50%-100% EtOAc:hexanes afforded **18{2}** as a brown foam (1.146 g, 86%). <sup>1</sup>H NMR (600 MHz, CDCl<sub>3</sub>) δ 7.50 (d, J=8.6 Hz, 2H) 6.88 (d, J= 8.6 Hz, 2H), 6.68 (d, J=8.8 Hz, 2H) 6.60 (d, J=9.0 Hz, 2H) 6.36 (s, 1H), 5.48 (s, 1H), 4.06-3.91 (m, 1H ), 3.82 (s, 3H), 3.71 (s, 3H), 3.48-3.44 (m, 1H), 3.28 (d, J=, 1H), 3.28-3.23 (m, 1H), 2.8 (d, J=, 1H), 2.02-1.97 (m, 1H), 1.90-1.78 (m, 4H); <sup>13</sup>C NMR (151 MHz,) δ 174.0, 168.0, 160.5, 160.0, 136.4, 130.7, 129.3, 121.4, 114.3, 113.7, 63.3, 62.8, 55.6, 55.4, 48.3, 48.0, 42.7, 27.3, 23.5; IR (neat) 3230, 2915, 1696, 1612, 1284 cm<sup>-1</sup>; HRMS (ESI) *m/z* calcd for C<sub>23</sub>H<sub>26</sub>N<sub>2</sub>O<sub>4</sub>S (M+H)<sup>+</sup> 427.1686, found 427.1685.

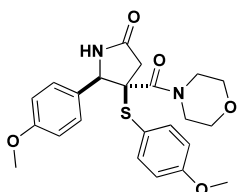

**18{3}**. The title compound was prepared from **15** (2.0 g, 5.36 mmol) according to general experimental A. Flash column chromatography with 50%-100% EtOAc:hexanes afforded **18{3}** as a brown foam (1.66 g, 70%). <sup>1</sup>H NMR (600 MHz, CDCl<sub>3</sub>) δ 7.34 (d, J=8.7 Hz, 2H) 6.92-6.87 (m, 4H), 6.68 (d, J= 8.9 Hz, 2H), 6.49 (s, 1H), 5.29 (s, 1H), 3.84-3.70 (bm, 8H), 3.82 (s, 3H), 3.74 (s, 3H), 3.27 (d, J=16.9 Hz, 1H) 2.74 (d, J=16.9 Hz, 1H); <sup>13</sup>C NMR (151 MHz,) δ 174.2, 169.2, 160.6, 160.3, 136.1, 130.1, 129.0, 121.2, 114.7, 114.0, 66.7, 63.7, 61.1, 55.6, 55.5, 42.8; IR (neat) 3247, 2852, 1701, 1633, 1503 cm<sup>-1</sup>; HRMS (ESI) *m/z* calcd for C<sub>23</sub>H<sub>26</sub>N<sub>2</sub>O<sub>5</sub>S (M+H)<sup>+</sup> 443.1635, found 443.1635.

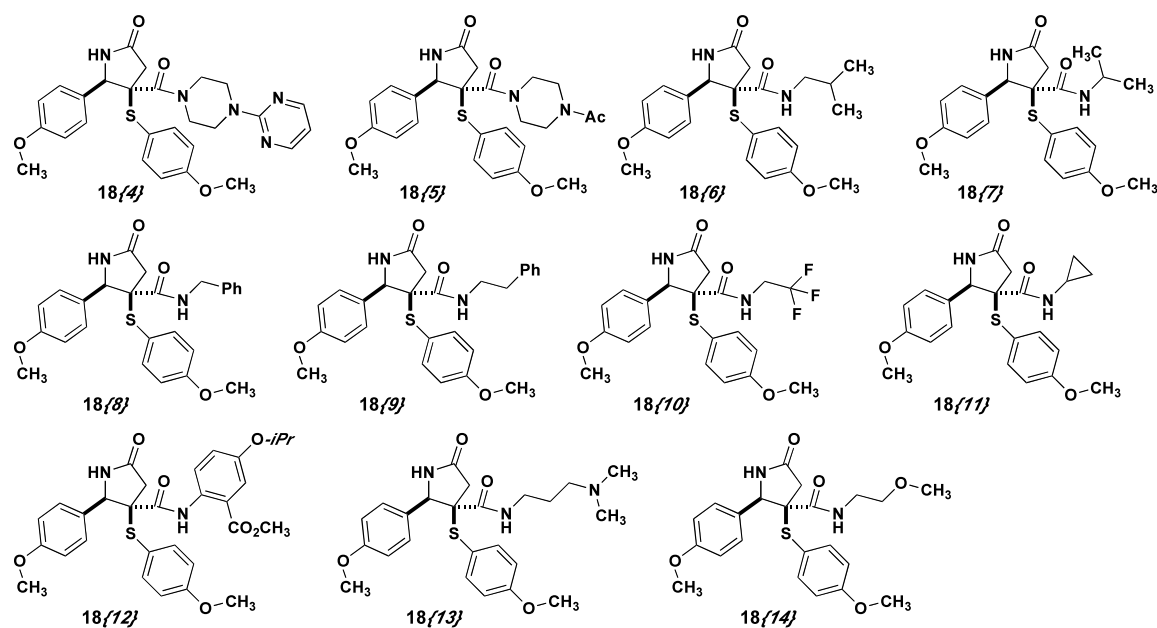

| Cmpd # | Formula                                                                        | M + | Calc'd Mass | Found Mass | %Purity HPLC |
|--------|--------------------------------------------------------------------------------|-----|-------------|------------|--------------|
| 18{4}  | C <sub>27</sub> H <sub>29</sub> N <sub>5</sub> O <sub>4</sub> S                | H   | 520.2013    | 520.2041   | 94.4         |
| 18{5}  | C <sub>25</sub> H <sub>29</sub> N <sub>3</sub> O <sub>5</sub> S                | H   | 484.1901    | 484.1877   | 96.2         |
| 18{6}  | C <sub>23</sub> H <sub>28</sub> N <sub>2</sub> O <sub>4</sub> S                | H   | 429.1843    | 429.1832   | 100          |
| 18{7}  | C <sub>22</sub> H <sub>26</sub> N <sub>2</sub> O <sub>4</sub> S                | H   | 415.1687    | 415.1664   | 99.5         |
| 18{8}  | C <sub>26</sub> H <sub>26</sub> N <sub>2</sub> O <sub>4</sub> S                | H   | 463.1683    | 463.1661   | 98.6         |
| 18{9}  | C <sub>27</sub> H <sub>28</sub> N <sub>2</sub> O <sub>4</sub> S                | H   | 477.1843    | 477.1876   | 96.9         |
| 18{10} | C <sub>21</sub> H <sub>21</sub> F <sub>3</sub> N <sub>2</sub> O <sub>4</sub> S | H   | 455.1247    | 455.1244   | 98.0         |
| 18{11} | C <sub>22</sub> H <sub>24</sub> N <sub>2</sub> O <sub>4</sub> S                | H   | 413.1530    | 413.1505   | 98.3         |
| 18{12} | C <sub>30</sub> H <sub>32</sub> N <sub>2</sub> O <sub>7</sub> S                | H   | 565.2003    | 565.1969   | 100.0        |
| 18{13} | C <sub>24</sub> H <sub>31</sub> N <sub>3</sub> O <sub>4</sub> S                | H   | 458.2108    | 458.2139   | 93.4         |
| 18{14} | C <sub>22</sub> H <sub>26</sub> N <sub>2</sub> O <sub>5</sub> S                | H   | 431.1635    | 431.1643   | 98.5         |

**General Experimental B: Arylation of lactams 18{1-4}**. Reaction vials for the Heidolph Carousel 12 reaction block were charged with a stir bar and 3 angstrom molecular sieves. Lactams **18{1-4}** were added to reaction vials followed by copper (II) acetate (2 equiv.) and arylboronic acids **27{1-8}** (4 equiv.). Reagents were then dissolved in CH<sub>3</sub>CN (0.05 M) and triethylamine (4 equiv.) and reaction was stirred at room temperature for 48 hours. CH<sub>3</sub>CN was removed *in vacuo* and the residue was taken up in DCM and water and the layers were separated. The aqueous layer was extracted twice more with DCM. The combined organic fractions were dried over Na<sub>2</sub>SO<sub>4</sub>, filtered and concentrated. Purification by flash column chromatography afforded the title compounds **19** in 4.5-69% yield.

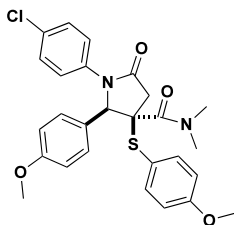

**19{1,7}**. The title compound was prepared from **18{1}** (0.040 g, 0.100 mmol) according to general experimental B. Flash column chromatography with 20%-100% EtOAc:hexanes afforded **19{1,7}** as an oil (0.021 g, 41%). <sup>1</sup>H NMR (600 MHz, CDCl<sub>3</sub>) δ 7.31 (d, J=9.0 Hz, 2H), 7.27-7.25 (m, 2H), 7.17 (d, J=8.9 Hz, 2H), 6.93 (d, J=8.7 Hz, 2H), 6.91 (d, J=8.8 Hz, 2H), 6.72 (d, J=8.8 Hz, 2H), 5.71 (s, 1H), 3.82 (s, 3H), 3.76 (s, 3H), 3.62-3.48 (bs, 3H), 3.51 (d, J=16.9, 1H), 3.03 (d, J=16.9, 1H), 3.02-2.85 (bs, 3H); <sup>13</sup>C NMR (151 MHz, CDCl<sub>3</sub>) δ 171.0, 169.0, 160.6, 160.0, 136.5, 136.4, 130.5, 129.6, 128.8, 127.5, 123.6, 120.4, 114.5, 114.1, 69.5, 58.4, 55.3, 55.2, 43.3, 39.4, 37.9; IR (neat) 2931, 2840, 1704, 1631, 1591, cm<sup>-1</sup> HRMS (ESI) *m/z* calcd for C<sub>30</sub>H<sub>32</sub>N<sub>2</sub>O<sub>5</sub>S (M+H)<sup>+</sup> 511.1453, found 511.1452.

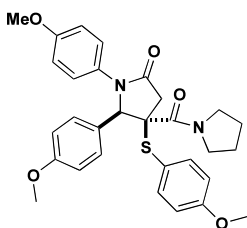

**19{2,3}**. The title compound was prepared from **18{2}** (0.050 g, 0.117 mmol) according to general experimental B. Flash column chromatography with 20%-100% EtOAc:hexanes afforded **19{2,3}** as a clear oil (0.043 g, 69%). <sup>1</sup>H NMR (600 MHz, CDCl<sub>3</sub>) δ 7.28 (d, J=8.6 Hz, 2H), 7.21 (d, J=9.0 Hz, 2H), 6.90 (d, J=8.7 Hz, 2H), 6.87 (d, J=8.7, 2H), 6.74 (d, J=8.9, 2H), 6.70 (d, J=8.7, 2H), 5.78 (s, 1H), 4.12 (bs, 1H), 4.02 (bs, 1H), 3.80 (s, 3H), 3.74 (s, 3H), 3.70 (s, 3H), 3.52 (d, J=16.9, 1H), 3.47 (bs, 1H), 3.40 (bs, 1H), 3.05 (d, J=16.9, 1H), 2.08-1.92 (m, 2H), 1.85-1.77 (m, 2H); <sup>13</sup>C NMR (151 MHz, CDCl<sub>3</sub>) δ 170.8, 167.5, 160.4, 159.7, 157.2, 136.1, 130.7, 130.1, 128.1, 124.7, 120.9, 114.3, 114.0, 113.8, 69.5, 59.4, 55.3, 55.2, 48.5, 42.5, 27.3, 23.3; IR (neat) 2960, 2832, 1688, 1592, 1507 cm<sup>-1</sup> HRMS (ESI) *m/z* calcd for C<sub>30</sub>H<sub>32</sub>N<sub>2</sub>O<sub>5</sub>S (M+H)<sup>+</sup> 533.2105, found 533.2105.

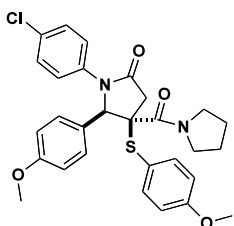

**19{2,7}**. The title compound was prepared from **18{2}** (0.050 g, 0.117 mmol) according to general experimental B. Flash column chromatography with 20%-100% EtOAc:hexanes afforded **19{2,7}** as a faint yellow oil (0.036 g, 57%).

$^1\text{H}$  NMR (600 MHz,  $\text{CDCl}_3$ )  $\delta$  7.31 (d,  $J=8.8$  Hz, 2H), 7.26-7.24 (m, 2H), 7.15 (d,  $J=8.8$  Hz, 2H), 6.90-6.86 (m, 4H), 6.69 (d,  $J=8.7$ , 2H), 5.81 (s, 1H), 4.14 (bs, 1H), 4.00 (bs, 1H), 3.79 (s, 3H), 3.73 (s, 3H), 3.50 (d,  $J=16.9$  Hz, 1H), 3.44 (bs, 1H), 3.38 (bs, 1H), 3.03 (d,  $J=16.9$ , 1H), 2.05-1.94 (bm, 2H), 1.88-1.78 (bm, 2H);  $^{13}\text{C}$  NMR (151 MHz,  $\text{CDCl}_3$ )  $\delta$  171.2, 167.6, 160.7, 160.1, 136.6, 136.4, 130.7, 130.1, 129.0, 127.8, 123.9, 120.8, 117.0, 114.6, 114.2, 69.1, 59.5, 55.5, 48.7, 42.8, 27.5, 23.5; IR (neat) 2975, 1708, 1639, 1366, 1249  $\text{cm}^{-1}$  HRMS (ESI)  $m/z$  calcd for  $\text{C}_{29}\text{H}_{29}\text{ClN}_2\text{O}_4\text{S}$  ( $\text{M}+\text{H}$ ) $^+$  537.1610, found 537.1608.

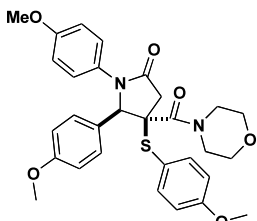

**19{3,3}**. The title compound was prepared from **18{3}** (0.040 g, 0.090 mmol) according to general experimental B. Flash column chromatography with 20%-100% EtOAc:hexanes afforded **19{3,3}** as a light brown solid (0.022 g, 45%). mp 180-185  $^{\circ}\text{C}$ ;  $^1\text{H}$  NMR (600 MHz,  $\text{CDCl}_3$ )  $\delta$  7.19-7.15 (m, 4H), 6.98 (d,  $J=8.4$  Hz, 2H), 6.89 (d,  $J=8.2$ , 2H), 6.74-6.72 (m, 4H), 5.52 (s, 1H), 3.95-3.72 (bm, 8H), 3.80 (s, 3H), 3.75 (s, 3H), 3.69 (s, 3H), 3.40 (d,  $J=16.7$  Hz, 1H), 2.98 (d,  $J=16.6$ , 1H);  $^{13}\text{C}$  NMR (151 MHz,  $\text{CDCl}_3$ )  $\delta$  170.6, 168.8, 160.5, 160.0, 157.4, 136.0, 130.6, 129.6, 127.8, 124.7, 120.6, 116.0, 114.5, 114.1, 70.6, 66.6, 58.0, 55.33, 55.30, 55.28, 42.8; IR (neat) 3060, 2966, 1706, 1635, 1233  $\text{cm}^{-1}$  HRMS (ESI)  $m/z$  calcd for  $\text{C}_{30}\text{H}_{32}\text{N}_2\text{O}_6\text{S}$  ( $\text{M}+\text{H}$ ) $^+$  549.2054, found 549.2051.

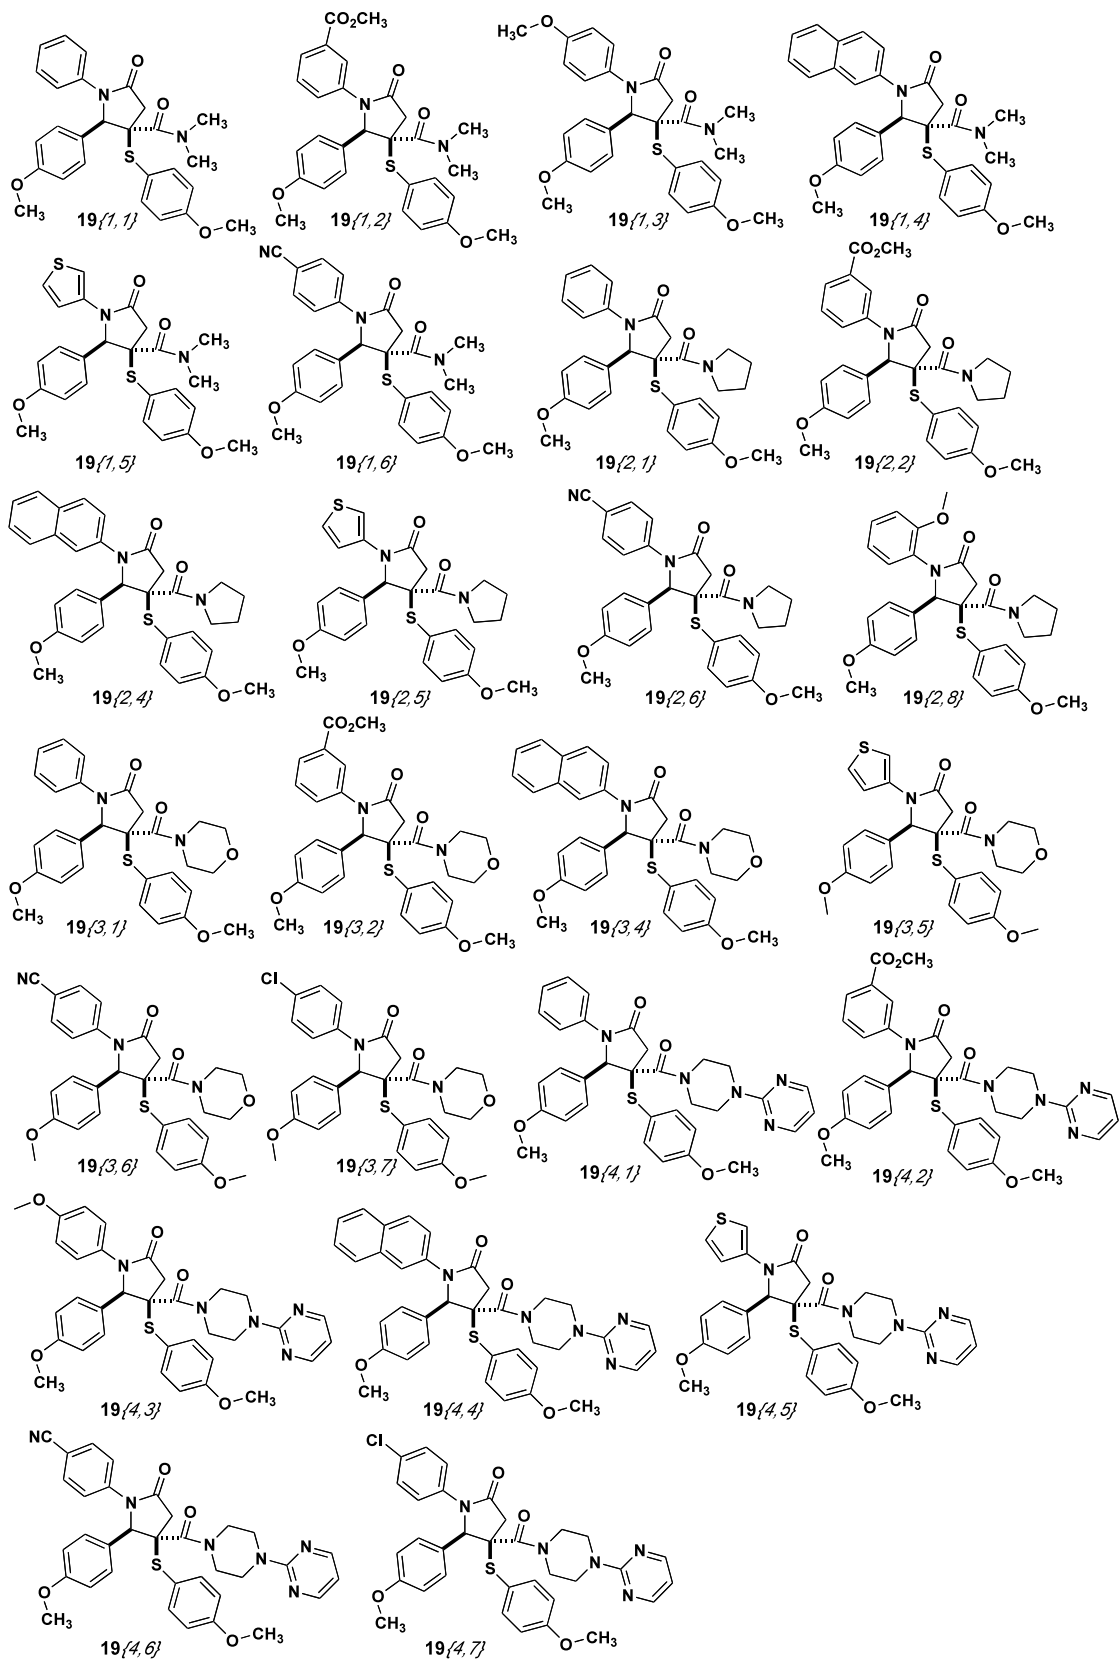



| Cmpd #  | Formula                                                                      | M + | Calc'd Mass | Found Mass | Purity HPLC |
|---------|------------------------------------------------------------------------------|-----|-------------|------------|-------------|
| 19{1,1} | C <sub>27</sub> H <sub>28</sub> N <sub>2</sub> O <sub>4</sub> S              | H   | 477.1843    | 477.1841   | 97.0        |
| 19{1,2} | C <sub>29</sub> H <sub>30</sub> N <sub>2</sub> O <sub>6</sub> S              | H   | 535.1897    | 535.1909   | 97.0        |
| 19{1,3} | C <sub>28</sub> H <sub>30</sub> N <sub>2</sub> O <sub>5</sub> S              | H   | 507.1948    | 507.1950   | 100.0       |
| 19{1,4} | C <sub>31</sub> H <sub>30</sub> N <sub>2</sub> O <sub>4</sub> S              | H   | 527.1999    | 527.2003   | 90.0        |
| 19{1,5} | C <sub>25</sub> H <sub>26</sub> N <sub>2</sub> O <sub>4</sub> S <sub>2</sub> | H   | 483.1407    | 483.1402   | 91.3        |
| 19{1,6} | C <sub>28</sub> H <sub>27</sub> N <sub>3</sub> O <sub>4</sub> S              | H   | 502.1798    | 502.1791   | 98.1        |
| 19{2,1} | C <sub>29</sub> H <sub>30</sub> N <sub>2</sub> O <sub>4</sub> S              | H   | 503.1999    | 503.2021   | 97.6        |
| 19{2,2} | C <sub>31</sub> H <sub>32</sub> N <sub>2</sub> O <sub>6</sub> S              | H   | 561.2054    | 561.2072   | 96.0        |
| 19{2,4} | C <sub>33</sub> H <sub>32</sub> N <sub>2</sub> O <sub>4</sub> S              | H   | 553.2156    | 553.2164   | 98.9        |
| 19{2,5} | C <sub>27</sub> H <sub>28</sub> N <sub>2</sub> O <sub>4</sub> S <sub>2</sub> | H   | 509.1563    | 509.1565   | 95.1        |
| 19{2,6} | C <sub>30</sub> H <sub>29</sub> N <sub>3</sub> O <sub>4</sub> S              | H   | 528.1952    | 528.1947   | 98.2        |
| 19{2,8} | C <sub>30</sub> H <sub>32</sub> N <sub>2</sub> O <sub>5</sub> S              | H   | 533.2105    | 533.2095   | 93.1        |
| 19{3,1} | C <sub>29</sub> H <sub>30</sub> N <sub>2</sub> O <sub>5</sub> S              | H   | 519.1948    | 519.1939   | 99.2        |
| 19{3,2} | C <sub>31</sub> H <sub>32</sub> N <sub>2</sub> O <sub>7</sub> S              | H   | 577.2003    | 577.1992   | 100.0       |
| 19{3,4} | C <sub>33</sub> H <sub>32</sub> N <sub>2</sub> O <sub>5</sub> S              | H   | 569.2105    | 569.2106   | 100.0       |
| 19{3,5} | C <sub>27</sub> H <sub>28</sub> N <sub>2</sub> O <sub>5</sub> S <sub>2</sub> | H   | 525.1512    | 525.1501   | 100.0       |
| 19{3,6} | C <sub>30</sub> H <sub>29</sub> N <sub>3</sub> O <sub>5</sub> S              | H   | 544.1901    | 544.1909   | 100.0       |
| 19{3,7} | C <sub>29</sub> H <sub>29</sub> ClN <sub>2</sub> O <sub>5</sub> S            | H   | 553.1558    | 553.1592   | 96.3        |
| 19{4,1} | C <sub>33</sub> H <sub>33</sub> N <sub>5</sub> O <sub>4</sub> S              | H   | 596.2326    | 596.2321   | 94.6        |
| 19{4,2} | C <sub>35</sub> H <sub>35</sub> N <sub>5</sub> O <sub>6</sub> S              | H   | 654.2381    | 654.2383   | 100.0       |
| 19{4,3} | C <sub>35</sub> H <sub>35</sub> N <sub>5</sub> O <sub>5</sub> S              | H   | 626.2432    | 626.2418   | 97.4        |
| 19{4,4} | C <sub>37</sub> H <sub>35</sub> N <sub>5</sub> O <sub>4</sub> S              | H   | 646.2483    | 646.2473   | 95.9        |
| 19{4,5} | C <sub>31</sub> H <sub>31</sub> N <sub>5</sub> O <sub>4</sub> S <sub>2</sub> | H   | 602.1890    | 602.1886   | 100.0       |
| 19{4,6} | C <sub>34</sub> H <sub>32</sub> N <sub>6</sub> O <sub>4</sub> S              | H   | 621.2279    | 621.2263   | 94.2        |
| 19{4,7} | C <sub>33</sub> H <sub>32</sub> ClN <sub>5</sub> O <sub>4</sub> S            | H   | 630.1936    | 630.1924   | 100.0       |

**General Experimental C: Acylation of Amides 18{1-5}.** Reaction vials for the Heidolph Carousel 12 reaction block were charged with a stir bar. Lactams **18{1-5}** were added to reaction vial and dissolved in THF (0.05 M) and cool to -78 °C in a dry ice:acetone bath. *n*-BuLi (2.5 M in hexanes, 1.2 equiv.) was then added and reaction was allowed to stir at -78 °C for two hours. Acylating agent **28{1-8}** were then added and reaction was allowed to warm to room temperature and run overnight. After 12-16 hours THF was removed *in vacuo* and the residue was taken up in DCM and water and the layers were separated. The aqueous layer was extracted twice more with DCM. The combined organic fractions were dried over Na<sub>2</sub>SO<sub>4</sub>, filtered and concentrated. Purification by flash column chromatography afforded the title compounds **20** in 12-90% yield.

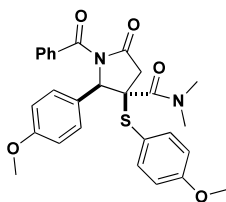

**20{1,1}** The title compound was prepared from **18{1}** (0.066 g, 0.165 mmol) according to general experimental C. Flash column chromatography with 20%-100% EtOAc:hexanes afforded **20{1,1}** as an oil (0.058 g, 70%). <sup>1</sup>H NMR (400 MHz, CDCl<sub>3</sub>) δ 7.54-7.51 (m, 2H), 7.49-7.45 (m, 1H), 7.38-7.34 (m, 4H), 7.03 (d, J=8.8 Hz, 2H), 6.98 (d, J=8.7 Hz, 2H), 6.75 (d, J=8.7 Hz, 2H), 5.79 (s, 1H), 3.83 (s, 3H), 3.75 (s, 3H), 3.70-3.56 (bs, 3H), 3.60 (d, J=17.2 Hz, 1H), 3.08-2.92 (bs, 3H), 3.03 (d, J=17.2 Hz, 1H); <sup>13</sup>C NMR (151 MHz, CDCl<sub>3</sub>) δ 172.0, 169.6, 161.1, 160.2, 137.3, 134.2, 133.7, 132.3, 130.3, 129.1, 128.8, 128.1, 120.2, 114.9, 114.4, 66.1, 57.8, 55.6, 55.6, 45.2, 40.1, 38.3; IR (neat) 2939, 2841, 1761, 1674, 1616 cm<sup>-1</sup>; HRMS (ESI) *m/z* calcd for C<sub>30</sub>H<sub>32</sub>N<sub>2</sub>O<sub>5</sub>S (M+H)<sup>+</sup> 505.1792, found 505.1782.

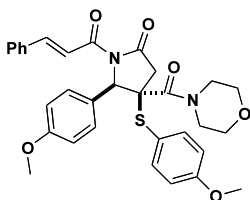

**20{3,2}** The title compound was prepared from **18{3}** (0.098 g, 0.221 mmol) according to general experimental C. Flash column chromatography with 20%-100% EtOAc:hexanes afforded **20{3,2}** as an oil (0.114g, 95%). <sup>1</sup>H NMR (600 MHz, CDCl<sub>3</sub>) δ 7.92 (d, J=15.7 Hz, 1H), 7.71 (d, J=15.8 Hz, 1H), 7.58-7.52 (m, 2H), 7.37-7.32 (m, 3H), 7.24 (d, J=8.6 Hz, 2H), 7.09 (d, J=8.9, 2H), 6.96 (d, J=8.0 Hz, 2H), 6.77 (d, J=8.2 Hz, 2H), 5.76 (s, 1H), 4.12-3.70 (bm, 8H), 3.82 (s, 3H), 3.77 (s, 3H), 3.55 (d, J=17.0, 1H), 3.05 (d, J=17.0, 1H); <sup>13</sup>C NMR (151 MHz, CDCl<sub>3</sub>) δ 172.2, 168.7, 165.1, 160.9, 160.0, 146.5, 137.1, 134.6, 130.6, 128.8, 128.6, 128.5, 127.5, 119.7, 118.9, 114.7, 114.3, 66.5, 65.4, 56.5, 55.3, 55.2, 45.2; IR (neat) 2927, 2843, 1750, 1685, 1642 cm<sup>-1</sup>; HRMS (ESI) *m/z* calcd for C<sub>32</sub>H<sub>32</sub>N<sub>2</sub>O<sub>6</sub>S (M+H)<sup>+</sup> 573.2054, found 573.2035.

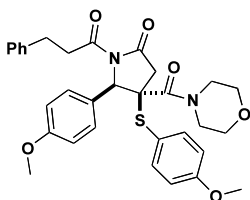

**20{3,5}** The title compound was prepared from **18{3}** (0.104 g, 0.235 mmol) according to general experimental C. Flash column chromatography with 20%-100% EtOAc:hexanes afforded **20{3,5}** as an oil (0.106 g, 79%). <sup>1</sup>H NMR (400 MHz, CDCl<sub>3</sub>) δ 8.25-8.21 (m, 2H), 8.18-8.12 (m, 5H), 8.06 (d, J=8.5 Hz, 2H), 7.95 (d, J=8.6 Hz, 2H), 7.75 (d, J=8.9 Hz, 2H), 6.63 (s, 1H), 5.02-4.70 (bm, 8H), 4.84 (s, 3H), 4.76 (s, 3H), 4.49 (d, J=17.0 Hz, 1H), 4.29-4.13 (m, 2H), 3.98 (d, J=17.1 Hz, 1H), 3.91-3.80 (m, 2H); <sup>13</sup>C NMR (101 MHz,

CDCl<sub>3</sub>) δ 172.5, 172.2, 169.0, 161.2, 160.3, 140.7, 137.2, 128.7, 128.6, 128.0, 127.7, 126.3, 120.0, 115.0, 114.5, 66.7, 65.3, 56.8, 55.6, 55.5, 45.1, 39.1, 30.2, ; IR (neat) 2918, 2859, 1752, 1684, 1515 cm<sup>-1</sup> HRMS (ESI) *m/z* calcd for C<sub>32</sub>H<sub>34</sub>N<sub>2</sub>O<sub>6</sub>S (M+H<sub>2</sub>O) 592.2243, found 592.2484.

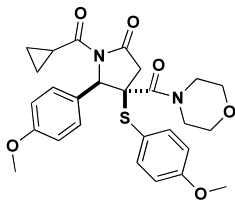

**20{3,6}** The title compound was prepared from **18{3}** (0.100 g, 0.226 mmol) according to general experimental C. Flash column chromatography with 20%-100% EtOAc:hexanes afforded **20{3,6}** as a yellow oil (0.104 g, 90%) that solidified after freezing. mp 229-232 °C; <sup>1</sup>H NMR (400 MHz, CDCl<sub>3</sub>) δ 7.18 (d, J=8.7 Hz, 2H), 7.08 (d, J=8.8 Hz, 2H), 6.95 (d, J= 8.7 Hz, 2H), 6.76 (d, J=8.8 Hz, 2H), 5.63 (s, 1H), 4.14-3.70 (bm, 8H), 3.83 (s, 3H), 3.77 (s, 3H), 3.53 (d, J=17.0 Hz, 1H), 3.22-3.16 (m, 1H), 3.03 (d, J=17 Hz, 1H), 1.09-1.04 (m, 1H), 1.00-0.87 (m, 3H); <sup>13</sup>C NMR (101 MHz, CDCl<sub>3</sub>) δ 174.4, 172.6, 168.9, 161.2, 160.2, 137.2, 128.6, 127.9, 120.0, 114.9, 114.5, 66.7, 65.7, 56.5, 55.5, 45.4, 14.2, 11.5, 10.9; IR (neat) 2969, 1760, 1740, 1690, 1638 cm<sup>-1</sup>; HRMS (ESI) *m/z* calcd for C<sub>27</sub>H<sub>30</sub>N<sub>2</sub>O<sub>6</sub>S (M+H)<sup>+</sup> 511.1897, found 511.1859.



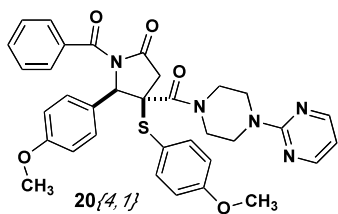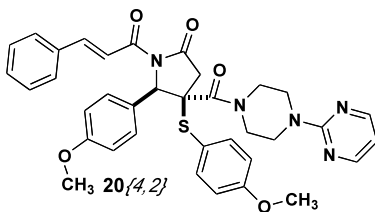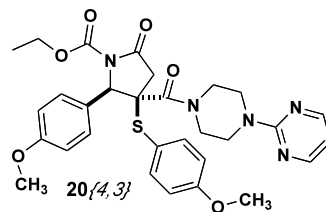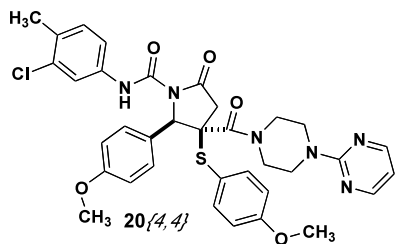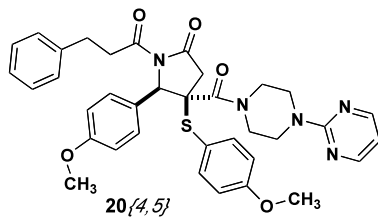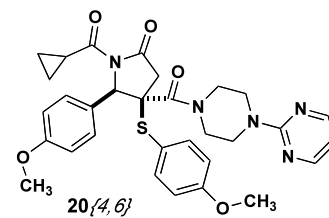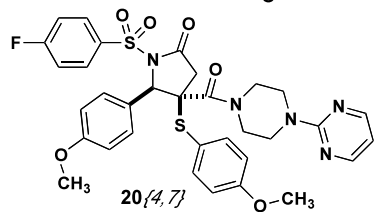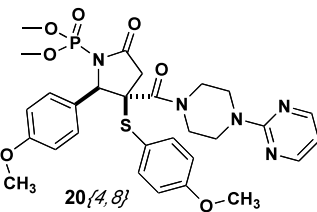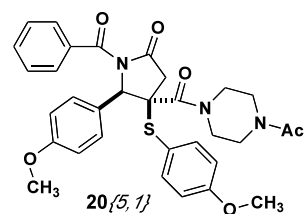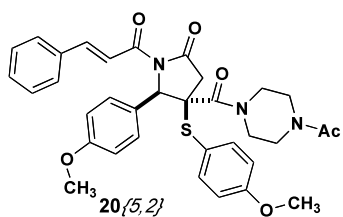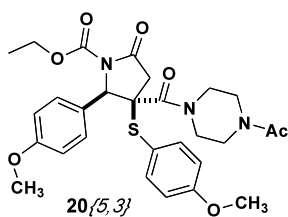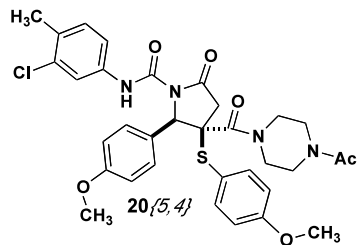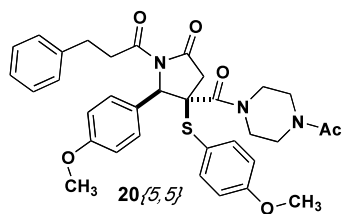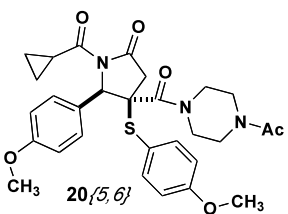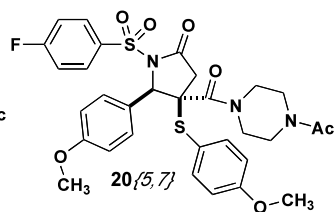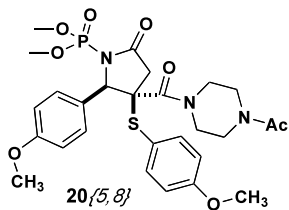

| Cmpd #  | Formula                                                                       | M +             | Calc'd Mass | Found Mass | %Purity HPLC |
|---------|-------------------------------------------------------------------------------|-----------------|-------------|------------|--------------|
| 20{1,2} | C <sub>30</sub> H <sub>30</sub> N <sub>2</sub> O <sub>5</sub> S               | H               | 531.1948    | 531.1944   | 97.0         |
| 20{1,3} | C <sub>24</sub> H <sub>28</sub> N <sub>2</sub> O <sub>6</sub> S               | H               | 473.1741    | 473.1755   | 100.0        |
| 20{1,4} | C <sub>29</sub> H <sub>30</sub> ClN <sub>3</sub> O <sub>5</sub> S             | H               | 568.1667    | 568.1619   | 94.6         |
| 20{1,5} | C <sub>30</sub> H <sub>32</sub> N <sub>2</sub> O <sub>5</sub> S               | H               | 533.2105    | 533.2104   | 98.3         |
| 20{1,6} | C <sub>25</sub> H <sub>30</sub> N <sub>2</sub> O <sub>5</sub> S               | H               | 469.1792    | 469.1782   | 100.0        |
| 20{1,7} | C <sub>27</sub> H <sub>27</sub> FN <sub>2</sub> O <sub>6</sub> S <sub>2</sub> | H               | 559.1367    | 559.1381   | 99.6         |
| 20{1,8} | C <sub>23</sub> H <sub>29</sub> N <sub>2</sub> O <sub>7</sub> PS              | H               | 509.1506    | 509.1500   | 98.5         |
| 20{2,1} | C <sub>30</sub> H <sub>30</sub> N <sub>2</sub> O <sub>5</sub> S               | H               | 531.1948    | 531.1935   | 100.0        |
| 20{2,2} | C <sub>32</sub> H <sub>32</sub> N <sub>2</sub> O <sub>5</sub> S               | H               | 557.2105    | 557.2109   | 96.7         |
| 20{2,3} | C <sub>26</sub> H <sub>30</sub> N <sub>2</sub> O <sub>6</sub> S               | NH <sub>4</sub> | 516.2168    | 516.2154   | 95.4         |
| 20{2,4} | C <sub>31</sub> H <sub>32</sub> ClN <sub>3</sub> O <sub>5</sub> S             | H               | 594.1824    | 594.1813   | 99.8         |
| 20{2,5} | C <sub>32</sub> H <sub>34</sub> N <sub>2</sub> O <sub>5</sub> S               | NH <sub>4</sub> | 576.2532    | 576.2523   | 98.4         |
| 20{2,6} | C <sub>27</sub> H <sub>30</sub> N <sub>2</sub> O <sub>5</sub> S               | H               | 495.1948    | 495.1949   | 98.2         |
| 20{2,7} | C <sub>29</sub> H <sub>29</sub> FN <sub>2</sub> O <sub>6</sub> S <sub>2</sub> | H               | 585.1524    | 585.1548   | 92.8         |
| 20{2,8} | C <sub>25</sub> H <sub>31</sub> N <sub>2</sub> O <sub>7</sub> PS              | NH <sub>4</sub> | 552.1933    | 552.1912   | 92.5         |
| 20{3,1} | C <sub>30</sub> H <sub>30</sub> N <sub>2</sub> O <sub>6</sub> S               | H               | 547.1897    | 547.1895   | 100.0        |
| 20{3,3} | C <sub>26</sub> H <sub>30</sub> N <sub>2</sub> O <sub>7</sub> S               | H               | 515.1846    | 515.1840   | 100.0        |
| 20{3,4} | C <sub>31</sub> H <sub>32</sub> ClN <sub>3</sub> O <sub>6</sub> S             | H               | 610.1773    | 610.1766   | 97.1         |
| 20{3,7} | C <sub>29</sub> H <sub>29</sub> FN <sub>2</sub> O <sub>7</sub> S <sub>2</sub> | H               | 601.1473    | 601.1369   | 100.0        |
| 20{3,8} | C <sub>25</sub> H <sub>31</sub> N <sub>2</sub> O <sub>8</sub> PS              | H               | 551.1611    | 551.1632   | 98.9         |
| 20{4,1} | C <sub>34</sub> H <sub>33</sub> N <sub>5</sub> O <sub>5</sub> S               | H               | 624.2275    | 624.2255   | 99.3         |
| 20{4,2} | C <sub>36</sub> H <sub>35</sub> N <sub>5</sub> O <sub>5</sub> S               | H               | 650.2432    | 650.2452   | 90.7         |
| 20{4,3} | C <sub>30</sub> H <sub>33</sub> N <sub>5</sub> O <sub>6</sub> S               | H               | 592.2224    | 592.2276   | 95.9         |
| 20{4,4} | C <sub>35</sub> H <sub>35</sub> ClN <sub>6</sub> O <sub>5</sub> S             | H               | 687.2151    | 687.2177   | 99.4         |
| 20{4,5} | C <sub>36</sub> H <sub>37</sub> N <sub>5</sub> O <sub>5</sub> S               | H               | 652.2588    | 652.2590   | 92.4         |
| 20{4,6} | C <sub>31</sub> H <sub>33</sub> N <sub>5</sub> O <sub>5</sub> S               | H               | 588.2275    | 588.2281   | 100.0        |
| 20{4,7} | C <sub>33</sub> H <sub>32</sub> FN <sub>5</sub> O <sub>6</sub> S <sub>2</sub> | H               | 678.1851    | 678.1839   | 100.0        |
| 20{4,8} | C <sub>29</sub> H <sub>34</sub> N <sub>5</sub> O <sub>7</sub> PS              | H               | 628.1989    | 628.2016   | 99.9         |
| 20{5,1} | C <sub>32</sub> H <sub>33</sub> N <sub>3</sub> O <sub>6</sub> S               | H               | 588.2163    | 588.2127   | 100.0        |
| 20{5,2} | C <sub>34</sub> H <sub>35</sub> N <sub>3</sub> O <sub>6</sub> S               | H               | 614.2319    | 614.2289   | 99.4         |
| 20{5,3} | C <sub>28</sub> H <sub>33</sub> N <sub>3</sub> O <sub>7</sub> S               | H               | 556.2112    | 556.2090   | 99.9         |
| 20{5,4} | C <sub>33</sub> H <sub>35</sub> ClN <sub>4</sub> O <sub>6</sub> S             | H               | 651.2039    | 651.2021   | 99.7         |
| 20{5,5} | C <sub>34</sub> H <sub>37</sub> N <sub>3</sub> O <sub>6</sub> S               | H               | 616.2476    | 616.2476   | 99.5         |
| 20{5,6} | C <sub>29</sub> H <sub>33</sub> N <sub>3</sub> O <sub>6</sub> S               | H               | 552.2163    | 552.2157   | 99.6         |
| 20{5,7} | C <sub>31</sub> H <sub>32</sub> FN <sub>3</sub> O <sub>7</sub> S <sub>2</sub> | H               | 642.1738    | 642.1762   | 100.0        |
| 20{5,8} | C <sub>27</sub> H <sub>34</sub> N <sub>3</sub> O <sub>8</sub> PS              | H               | 592.1877    | 592.1893   | 97.6         |

### Preparation of desulfurized amides **31**{3}.

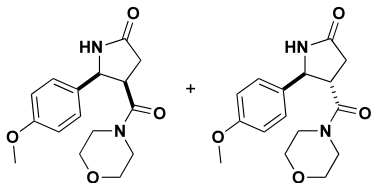

**31**{3}. NH amide **18**{3} (1.5 g, 3.39 mmol) was added to a round bottom flask and dissolved in 136 ml (0.025 M) of a 1:2 mixture of THF and EtOH at room temperature. 10 ml of Raney Nickel 2800 (Sigma Aldrich) in water was then added as a slurry and the reaction was stirred at room temperature. After 24 hours the reaction was filtered through celite and solvent was removed *in vacuo* and the residue was taken up in EtOAc and water and the layers were separated. The aqueous layer was extracted twice more with EtOAc. The combined organic fractions were dried over Na<sub>2</sub>SO<sub>4</sub>, filtered and concentrated. Purification by flash column chromatography with 50%-100% EtOAc:hexanes afforded a 10:90 mixture of diastereomers as a brown foam (0.618 g, 60%). Treatment of the mixture with 40% EtOAc:hexanes led to crystallization of some of the minor diastereomer and x-ray crystallography revealed it to be the *syn* diastereomer of **31**{3}.

**Syn diastereomer:** mp 193-197 °C; <sup>1</sup>H NMR (600 MHz, CDCl<sub>3</sub>) δ 7.18 (d, J=8.7 Hz, 2H), 6.87 (d, J=8.7 Hz, 2H), 6.03 (s, 1H), 4.93 (d, J=8.4 Hz, 1H), 3.86-3.80 (m, 1H), 3.80 (s, 3H), 3.56-3.48 (m, 2H), 3.40-3.37 (m, 2H), 3.30-3.26 (m, 1H), 3.19 (dd, J=17.2, 6.0 Hz, 1H), 3.21-3.15 (m, 2H), 3.08-3.05 (m, 1H), 2.48 (dd, 17.1, 8.8 Hz, 1H); <sup>13</sup>C NMR (151 MHz,) δ 176.8, 168.3, 160.0, 129.3, 128.5, 114.0, 66.4, 66.0, 59.4, 55.3, 45.7, 42.0, 41.9, 33.3; IR (neat) 3177, 3077, 1686, 1639, 1519 cm<sup>-1</sup>; HRMS (ESI) *m/z* calcd for C<sub>16</sub>H<sub>21</sub>N<sub>2</sub>O<sub>4</sub> (M+H)<sup>+</sup> 305.1496, found 305.1494.

**Anti diastereomer:** <sup>1</sup>H NMR (600 MHz, CDCl<sub>3</sub>) δ 7.26 (d, J=8.6 Hz, 2H), 6.90 (d, J=8.6 Hz, 2H), 6.23 (s, 1H), 4.96 (d, J=7.6 Hz, 1H), 3.81 (s, 3H), 3.72-3.64 (m, 2H), 3.58-3.52 (m, 2H), 3.46-3.42 (m, 1H), 3.32-3.27 (m, 1H), 3.24-3.15 (m, 2H), 3.03-3.00 (m, 1H), 2.86 (dd, J=16.7, 9.8 Hz, 1H), 2.60 (dd, J=16.7, 8.9 Hz, 1H); <sup>13</sup>C NMR (151 MHz,) δ 175.2, 170.0, 160.0, 132.3, 127.4, 114.5, 66.7, 66.4, 60.8, 55.4, 46.9, 46.1, 42.6, 35.2; IR (neat) 3253, 2969, 1694, 1633, 1513 cm<sup>-1</sup>; HRMS (ESI) *m/z* calcd for C<sub>16</sub>H<sub>21</sub>N<sub>2</sub>O<sub>4</sub> (M+H)<sup>+</sup> 305.1496, found 305.1514.

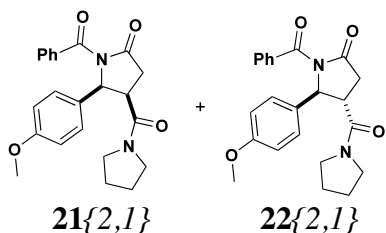

**21{2,1}** and **22{2,1}**. The title compounds were prepared from acylation **31{2}** (0.058 g, 0.201 mmol) according to general experimental C. Flash column chromatography with 50%-100% EtOAc:hexanes afforded **21{2,1}** as a off white foam (0.016 g, 19%) and **22{2,1}** as a yellow oil (0.014 g, 18%).

**21{2,1}**:  $^1\text{H NMR}$  (600 MHz,  $\text{CDCl}_3$ )  $\delta$  7.80-7.78 (m, 2H), 7.54-7.50 (m, 1H), 7.44-7.39 (m, 2H), 7.29 (d,  $J=8.5$  Hz, 2H), 6.80 (d,  $J=8.8$  Hz, 2H), 5.61 (d,  $J=7.8$  Hz, 1H), 3.74 (s, 3H), 3.64-3.61 (m, 1H), 3.36-3.32 (m, 1H), 3.27-3.22 (m, 2H), 3.01-2.96 (m, 1H), 2.93-2.90 (m, 1H), 2.68 (dd,  $J=17.5, 8.2$  Hz, 1H), 1.77-1.71 (m, 1H), 1.69-1.62 (m, 1H), 1.54-1.49 (m, 1H), 1.44-1.38 (m, 1H);  $^{13}\text{C NMR}$  (151 MHz,  $\text{CDCl}_3$ )  $\delta$  174.1, 170.6, 168.4, 159.6, 134.2, 133.4, 132.7, 130.1, 129.8, 128.4, 128.0, 127.8, 113.8, 62.9, 55.3, 46.4, 45.7, 41.4, 35.8, 25.8, 24.0; IR (neat) 2955, 2875, 1751, 1673, 1643  $\text{cm}^{-1}$  HRMS (ESI)  $m/z$  calcd for  $\text{C}_{23}\text{H}_{24}\text{N}_2\text{O}_4$  (M+H) $^+$  393.1809 found 393.1823.

**22{2,1}**:  $^1\text{H NMR}$  (600 MHz,  $\text{CDCl}_3$ )  $\delta$  7.71-7.69 (m, 2H), 7.51-7.50 (m, 1H), 7.42-7.39 (m, 2H), 7.29 (d,  $J=8.6$  Hz, 2H), 6.87 (d,  $J=8.6$  Hz, 2H), 5.49 (d,  $J=6.5$  Hz, 1H), 3.77 (s, 3H), 3.51-3.49 (m, 2H), 3.30-3.27 (m, 2H), 3.07 (dd,  $J=17.6, 7.9$  Hz, 1H), 2.93-2.89 (m, 1H), 2.84 (dd,  $J=17.7, 8.4$  Hz, 1H), 1.97-1.78 (m, 4H);  $^{13}\text{C NMR}$  (151 MHz,  $\text{CDCl}_3$ )  $\delta$  173.3, 170.0, 169.2, 159.4, 134.2, 133.4, 132.4, 130.1, 129.4, 128.4, 127.9, 126.9, 114.5, 64.5, 55.3, 46.6, 46.3, 45.2, 35.6, 26.0, 24.2; IR (neat) 2976, 2881, 1742, 1682, 1638  $\text{cm}^{-1}$  HRMS (ESI)  $m/z$  calcd for  $\text{C}_{23}\text{H}_{24}\text{N}_2\text{O}_4$  (M+H) $^+$  393.1809 found 393.1838.



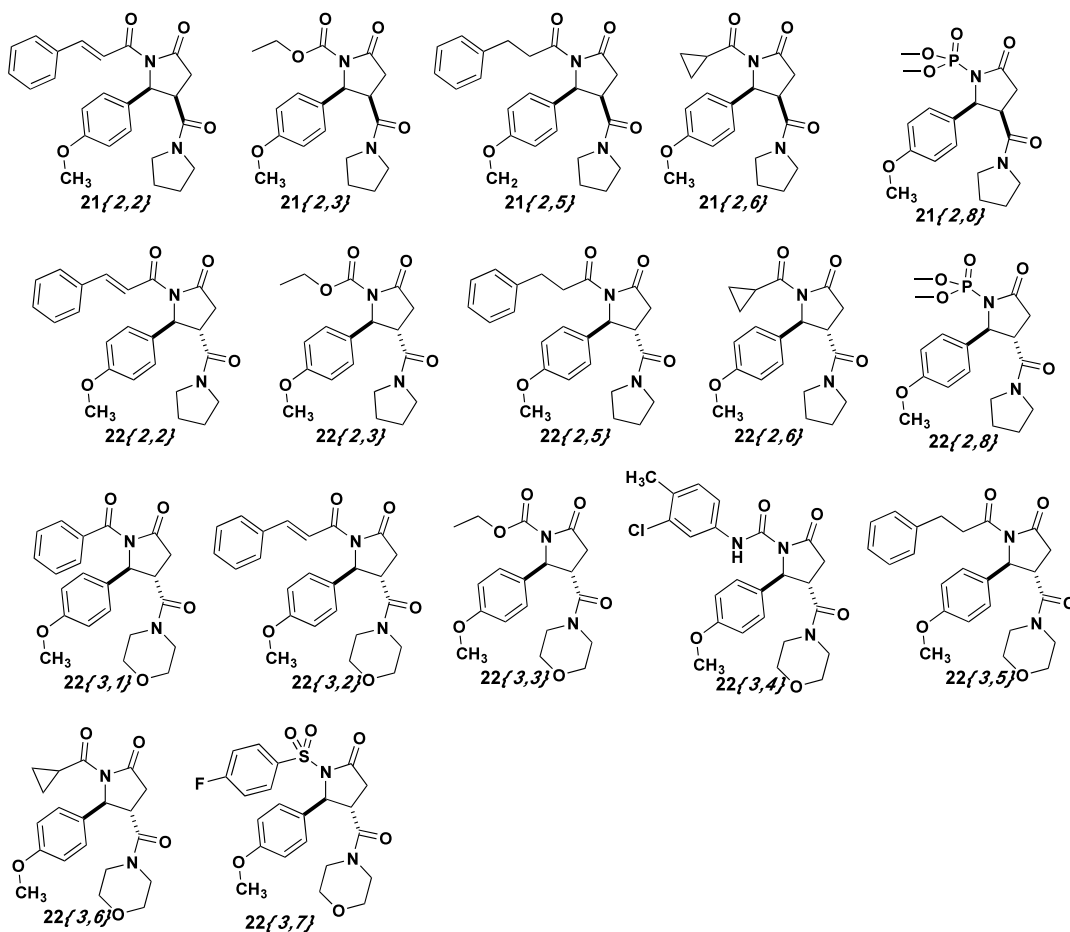

| Cmpd #  | Formula                                                          | M +             | Calc'd Mass | Found Mass | Purity HPLC |
|---------|------------------------------------------------------------------|-----------------|-------------|------------|-------------|
| 21{2,2} | C <sub>25</sub> H <sub>26</sub> N <sub>2</sub> O <sub>4</sub>    | H               | 419.1965    | 419.1983   | 90.6        |
| 21{2,3} | C <sub>19</sub> H <sub>24</sub> N <sub>2</sub> O <sub>5</sub>    | H               | 361.1758    | 361.1742   | 100.0       |
| 21{2,5} | C <sub>25</sub> H <sub>28</sub> N <sub>2</sub> O <sub>4</sub>    | H               | 421.2122    | 421.2130   | 98.8        |
| 21{2,6} | C <sub>20</sub> H <sub>24</sub> N <sub>2</sub> O <sub>4</sub>    | H               | 357.1809    | 357.1797   | 93.0        |
| 21{2,8} | C <sub>18</sub> H <sub>25</sub> N <sub>2</sub> O <sub>6</sub> P  | H               | 397.1523    | 357.1526   | 76.0        |
| 22{2,2} | C <sub>25</sub> H <sub>26</sub> N <sub>2</sub> O <sub>4</sub>    | H               | 419.1965    | 419.1954   | 98.8        |
| 22{2,3} | C <sub>19</sub> H <sub>24</sub> N <sub>2</sub> O <sub>5</sub>    | H               | 361.1758    | 362.1752   | 97.9        |
| 22{2,5} | C <sub>25</sub> H <sub>28</sub> N <sub>2</sub> O <sub>4</sub>    | H               | 421.2122    | 421.2143   | 97.0        |
| 22{2,6} | C <sub>20</sub> H <sub>24</sub> N <sub>2</sub> O <sub>4</sub>    | H               | 357.1809    | 357.1855   | 93.0        |
| 22{2,8} | C <sub>18</sub> H <sub>25</sub> N <sub>2</sub> O <sub>6</sub> P  | H               | 397.1523    | 357.1584   | 94.6        |
| 22{3,1} | C <sub>23</sub> H <sub>24</sub> N <sub>2</sub> O <sub>5</sub>    | NH <sub>4</sub> | 426.2029    | 426.2039   | 100.0       |
| 22{3,2} | C <sub>25</sub> H <sub>26</sub> N <sub>2</sub> O <sub>5</sub>    | H               | 435.1914    | 435.1913   | 96.8        |
| 22{3,3} | C <sub>19</sub> H <sub>24</sub> N <sub>2</sub> O <sub>6</sub>    | H               | 377.1707    | 377.1716   | 96.4        |
| 22{3,4} | C <sub>24</sub> H <sub>26</sub> ClN <sub>3</sub> O <sub>5</sub>  | H               | 472.1634    | 472.1657   | 100.0       |
| 22{3,5} | C <sub>25</sub> H <sub>28</sub> N <sub>2</sub> O <sub>5</sub>    | H               | 437.2071    | 437.2069   | 100.0       |
| 22{3,6} | C <sub>20</sub> H <sub>24</sub> N <sub>2</sub> O <sub>5</sub>    | H               | 373.1758    | 373.1773   | 96.5        |
| 22{3,7} | C <sub>22</sub> H <sub>23</sub> FN <sub>2</sub> O <sub>6</sub> S | H               | 463.1334    | 463.1349   | 100.0       |

**General Experimental D: Preparation of 1,2,4-oxadiazoles **23**{1-3}**. Acid chloride was prepared according to procedure for the preparation of **15**. The acid chloride was then dissolved in DCM (0.05 M) and oxime **29**{1-3} (1 equiv) and DIPEA (5 equiv) were added and reaction allowed to warm to room temperature and stirred overnight. DCM was removed *in vacuo* and residue taken up in water and extracted twice more with DCM. Organic layers were combined, dried over Na<sub>2</sub>SO<sub>4</sub> and concentrated *in vacuo*. The residue was then dissolved in toluene and refluxed with a Dean Stark trap for 2 hours. Toluene was removed *in vacuo* and the residue was taken up in DCM and water and the layers were separated. The aqueous layer was extracted twice more with DCM. The combined organic fractions were dried over Na<sub>2</sub>SO<sub>4</sub>, filtered and concentrated. Purification by flash column chromatography afforded the title compounds **23**{1-3} in 10-40% yield over two steps.

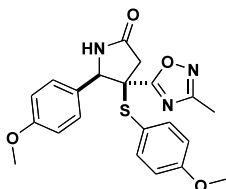

**23**{1} The title compound was prepared from **15** (0.095 g, 0.253 mmol) according to general experimental D. Flash column chromatography with 50%-100% EtOAc:hexanes afforded **23**{1} as a blue foam (0.040 g, 40%). <sup>1</sup>H NMR (600 MHz, CDCl<sub>3</sub>) δ 7.50 (d, J=8.9 Hz, 2H), 7.01 (d, J=8.9 Hz, 2H), 6.98 (d, J= 8.7 Hz, 2H), 6.76 (s, 1H), 6.73 (d, J=8.9 Hz, 2H), 5.36 (s, 1H), 3.84 (s, 3H), 3.76 (s, 3H), 3.24 (d, J=17.3, 1H), 2.97 (d, J=17.5, 1H), 2.37 (s, 3H); <sup>13</sup>C NMR (151 MHz, CDCl<sub>3</sub>) δ 180.0, 174.2, 167.4, 161.5, 160.7, 138.7, 129.8, 126.5, 119.5, 114.9, 114.0, 64.5, 55.7, 55.6, 55.5, 41.8, 11.8; IR (neat) 1724, 1689, 1515, 1497, 1250 cm<sup>-1</sup>; HRMS (ESI) *m/z* calcd for C<sub>21</sub>H<sub>21</sub>N<sub>3</sub>O<sub>4</sub>S (M+H)<sup>+</sup> 412.1326, found 412.1342.

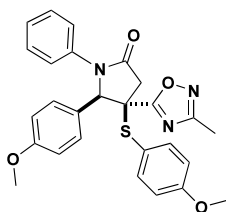

**24**{1,1}. The title compound was prepared from **23**{1} (0.038 g, 0.092 mmol) according to general experimental B. Flash column chromatography with 20%-100% EtOAc:hexanes afforded **24**{1,1} as an oil (0.009 g, 20%). <sup>1</sup>H NMR (600 MHz, CDCl<sub>3</sub>) δ 7.41-7.39 (m, 2H), 7.36-7.34 (m, 2H), 7.24-7.21 (m, 2H), 7.09-7.06 (m, 1H), 7.03-7.01 (m, 2H), 6.96-6.94 (m, 2H), 6.74-6.72 (m, 2H), 5.86 (s, 1H), 3.83 (s, 3H), 3.77 (s, 3H), 3.49 (d, J=17.1 Hz, 1H), 3.33 (d, J=17.1 Hz, 1H), 2.33 (s, 3H); <sup>13</sup>C NMR (151 MHz, CDCl<sub>3</sub>) δ 179.9, 170.3, 167.2, 161.2, 160.3, 138.0, 137.4, 129.4, 128.8, 125.9, 125.5, 122.2, 119.2, 114.6, 114.1, 70.4, 55.3, 55.3, 53.6, 42.8, 11.6 IR (neat) 2931, 2848, 1714,

1516, 1256  $\text{cm}^{-1}$  HRMS (ESI)  $m/z$  calcd for  $\text{C}_{27}\text{H}_{25}\text{N}_3\text{O}_4\text{S}$  ( $\text{M}+\text{H}$ )<sup>+</sup> 488.1639 found 488.1653

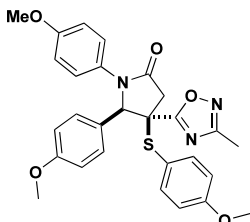

**24{1,3}**. The title compound was prepared from **23{1}** (0.038 g, 0.092 mmol) according to general experimental B. Flash column chromatography with 20%-100% EtOAc:hexanes afforded **24{1,3}** as an oil (0.015 g, 31%). <sup>1</sup>H NMR (600 MHz,  $\text{CDCl}_3$ )  $\delta$  7.38 (d,  $J=8.2$  Hz, 2H), 7.21 (d,  $J=9.5$  Hz, 2H), 7.01 (d,  $J=8.8$  Hz, 2H), 6.95 (d,  $J=8.8$  Hz, 2H), 6.75 (d,  $J=9.2$  Hz, 2H), 6.72 (d,  $J=8.8$  Hz, 2H), 5.75 (s, 1H), 3.83 (s, 3H), 3.77 (s, 3H), 3.71 (s, 3H), 3.47 (d,  $J=17.1$  Hz, 1H), 3.32 (d,  $J=17.1$  Hz, 1H), 2.34 (s, 3H); <sup>13</sup>C NMR (151 MHz,  $\text{CDCl}_3$ )  $\delta$  180.0, 170.2, 167.2, 161.3, 160.3, 157.3, 138.0, 130.3, 129.6, 126.1, 124.3, 119.3, 114.6, 114.1, 70.9, 55.4, 55.3, 55.3, 53.7, 42.7, 11.6; IR (neat) 2932, 2852, 1698, 1509, 1244  $\text{cm}^{-1}$  HRMS (ESI)  $m/z$  calcd for  $\text{C}_{28}\text{H}_{27}\text{N}_3\text{O}_5\text{S}$  ( $\text{M}+\text{H}$ )<sup>+</sup> 518.1744 found 518.1754.

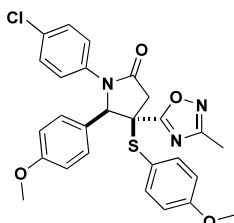

**24{1,7}**. The title compound was prepared from **23{1}** (0.04 g, 0.097 mmol) according to general experimental B. Flash column chromatography with 20%-100% EtOAc:hexanes afforded **24{1,7}** as an oil (0.041 g, 41%). <sup>1</sup>H NMR (600 MHz,  $\text{CDCl}_3$ )  $\delta$  7.36 (d,  $J=8.2$  Hz, 2H), 7.32 (d,  $J=9.0$  Hz, 2H), 7.18 (d,  $J=9.0$  Hz, 2H), 7.01 (d,  $J=8.7$  Hz, 2H), 6.95 (d,  $J=9.0$  Hz, 2H), 6.73 (d,  $J=8.8$  Hz, 2H), 5.82 (s, 1H), 3.83 (s, 3H), 3.77 (s, 3H), 3.48 (d,  $J=17.1$  Hz, 1H), 3.31 (d,  $J=16.9$  Hz, 1H), 2.33 (s, 3H); <sup>13</sup>C NMR (151 MHz,  $\text{CDCl}_3$ )  $\delta$  170.3, 167.2, 161.3, 160.4, 138.0, 136.0, 130.7, 129.4, 128.9, 125.4, 123.2, 119.0, 114.7, 114.2, 70.2, 55.3, 55.2, 53.5, 42.7, 11.6; IR (neat) 2939, 2840, 1710, 1591, 1256  $\text{cm}^{-1}$  HRMS (ESI)  $m/z$  calcd for  $\text{C}_{27}\text{H}_{24}\text{ClN}_3\text{O}_4\text{S}$  ( $\text{M}+\text{H}$ )<sup>+</sup> 522.1249 found 522.1263.

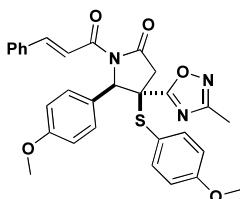

**25{1,2}**. The title compound was prepared from **23{1}** (0.03 g, 0.073 mmol) according to general experimental C. Flash column chromatography with 20%-100% EtOAc:hexanes afforded **25{1,2}** as a brown foam (0.040 g, 58%). <sup>1</sup>H NMR (600 MHz, CDCl<sub>3</sub>) δ 7.85 (d, J=15.8 Hz, 1H), 7.72 (d, J=15.7 Hz, 1H), 7.55-7.54 (m, 2H), 7.40 (d, J=8.6 Hz, 2H), 7.37-7.35 (m, 3H), 7.01 (d, J=8.7, 2H), 6.98 (d, J=9.0 Hz, 2H), 6.72 (d, J=8.8 Hz, 2H), 6.10 (s, 1H), 3.83 (s, 3H), 3.76 (s, 3H), 3.56 (d, J=17.4, 1H), 3.46 (d, J=17.4, 1H), 2.29 (s, 3H); <sup>13</sup>C NMR (151 MHz, CDCl<sub>3</sub>) δ 179.3, 171.4, 167.2, 164.7, 161.3, 160.2, 146.9, 137.8, 134.5, 130.7, 128.8, 128.7, 128.6, 126.7, 119.0, 118.5, 114.7, 114.1, 67.1, 55.3, 55.2, 52.4, 44.5, 11.5; IR (neat) 2962, 2936, 1741, 1680, 1248 cm<sup>-1</sup> HRMS (ESI) *m/z* calcd for C<sub>30</sub>H<sub>27</sub>N<sub>3</sub>O<sub>5</sub>S (M+H)<sup>+</sup> 542.1744, found 542.1735.

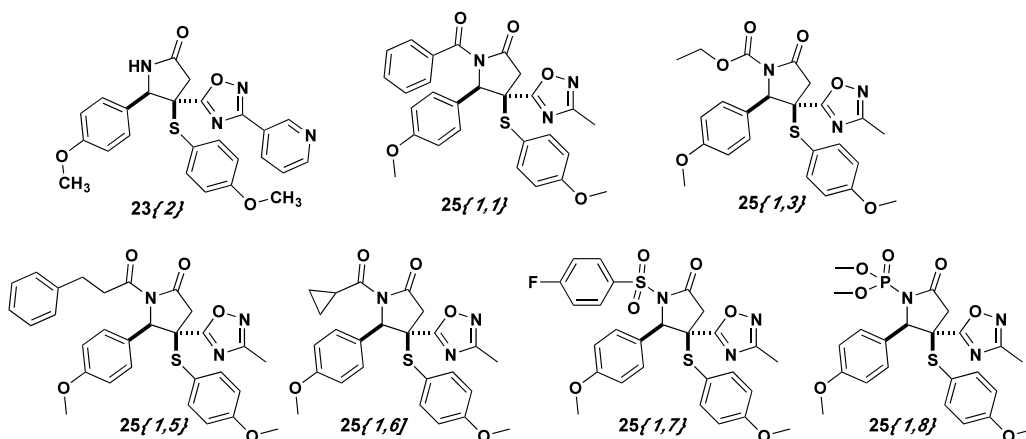

| Cmpd #         | Formula                                                                       | M + | Calc'd Mass | Found Mass | Purity HPLC |
|----------------|-------------------------------------------------------------------------------|-----|-------------|------------|-------------|
| <b>23{2}</b>   | C <sub>25</sub> H <sub>22</sub> N <sub>4</sub> O <sub>4</sub> S               | H   | 475.1435    | 475.1454   | 93.0        |
| <b>25{1,1}</b> | C <sub>28</sub> H <sub>25</sub> N <sub>3</sub> O <sub>5</sub> S               | H   | 516.1588    | 516.1607   | 97.3        |
| <b>25{1,3}</b> | C <sub>24</sub> H <sub>25</sub> N <sub>3</sub> O <sub>6</sub> S               | H   | 484.1537    | 484.1554   | 100.0       |
| <b>25{1,5}</b> | C <sub>30</sub> H <sub>29</sub> N <sub>3</sub> O <sub>5</sub> S               | H   | 544.1901    | 544.1899   | 97.5        |
| <b>25{1,6}</b> | C <sub>25</sub> H <sub>25</sub> N <sub>3</sub> O <sub>5</sub> S               | H   | 480.1588    | 480.1594   | 100.0       |
| <b>25{1,7}</b> | C <sub>27</sub> H <sub>24</sub> FN <sub>3</sub> O <sub>6</sub> S <sub>2</sub> | H   | 570.1163    | 570.1147   | 100.0       |
| <b>25{1,8}</b> | C <sub>23</sub> H <sub>26</sub> N <sub>3</sub> O <sub>7</sub> PS              | H   | 520.1302    | 520.1299   | 100.0       |

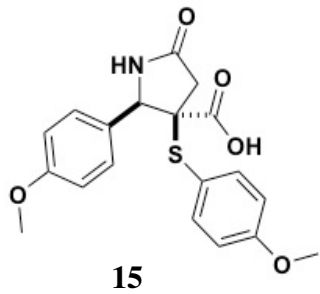

8.33

7.30  
7.29  
7.18  
7.16  
6.93  
6.90  
6.85  
6.83

5.11

3.73  
3.70

2.79  
2.75  
2.46  
2.42

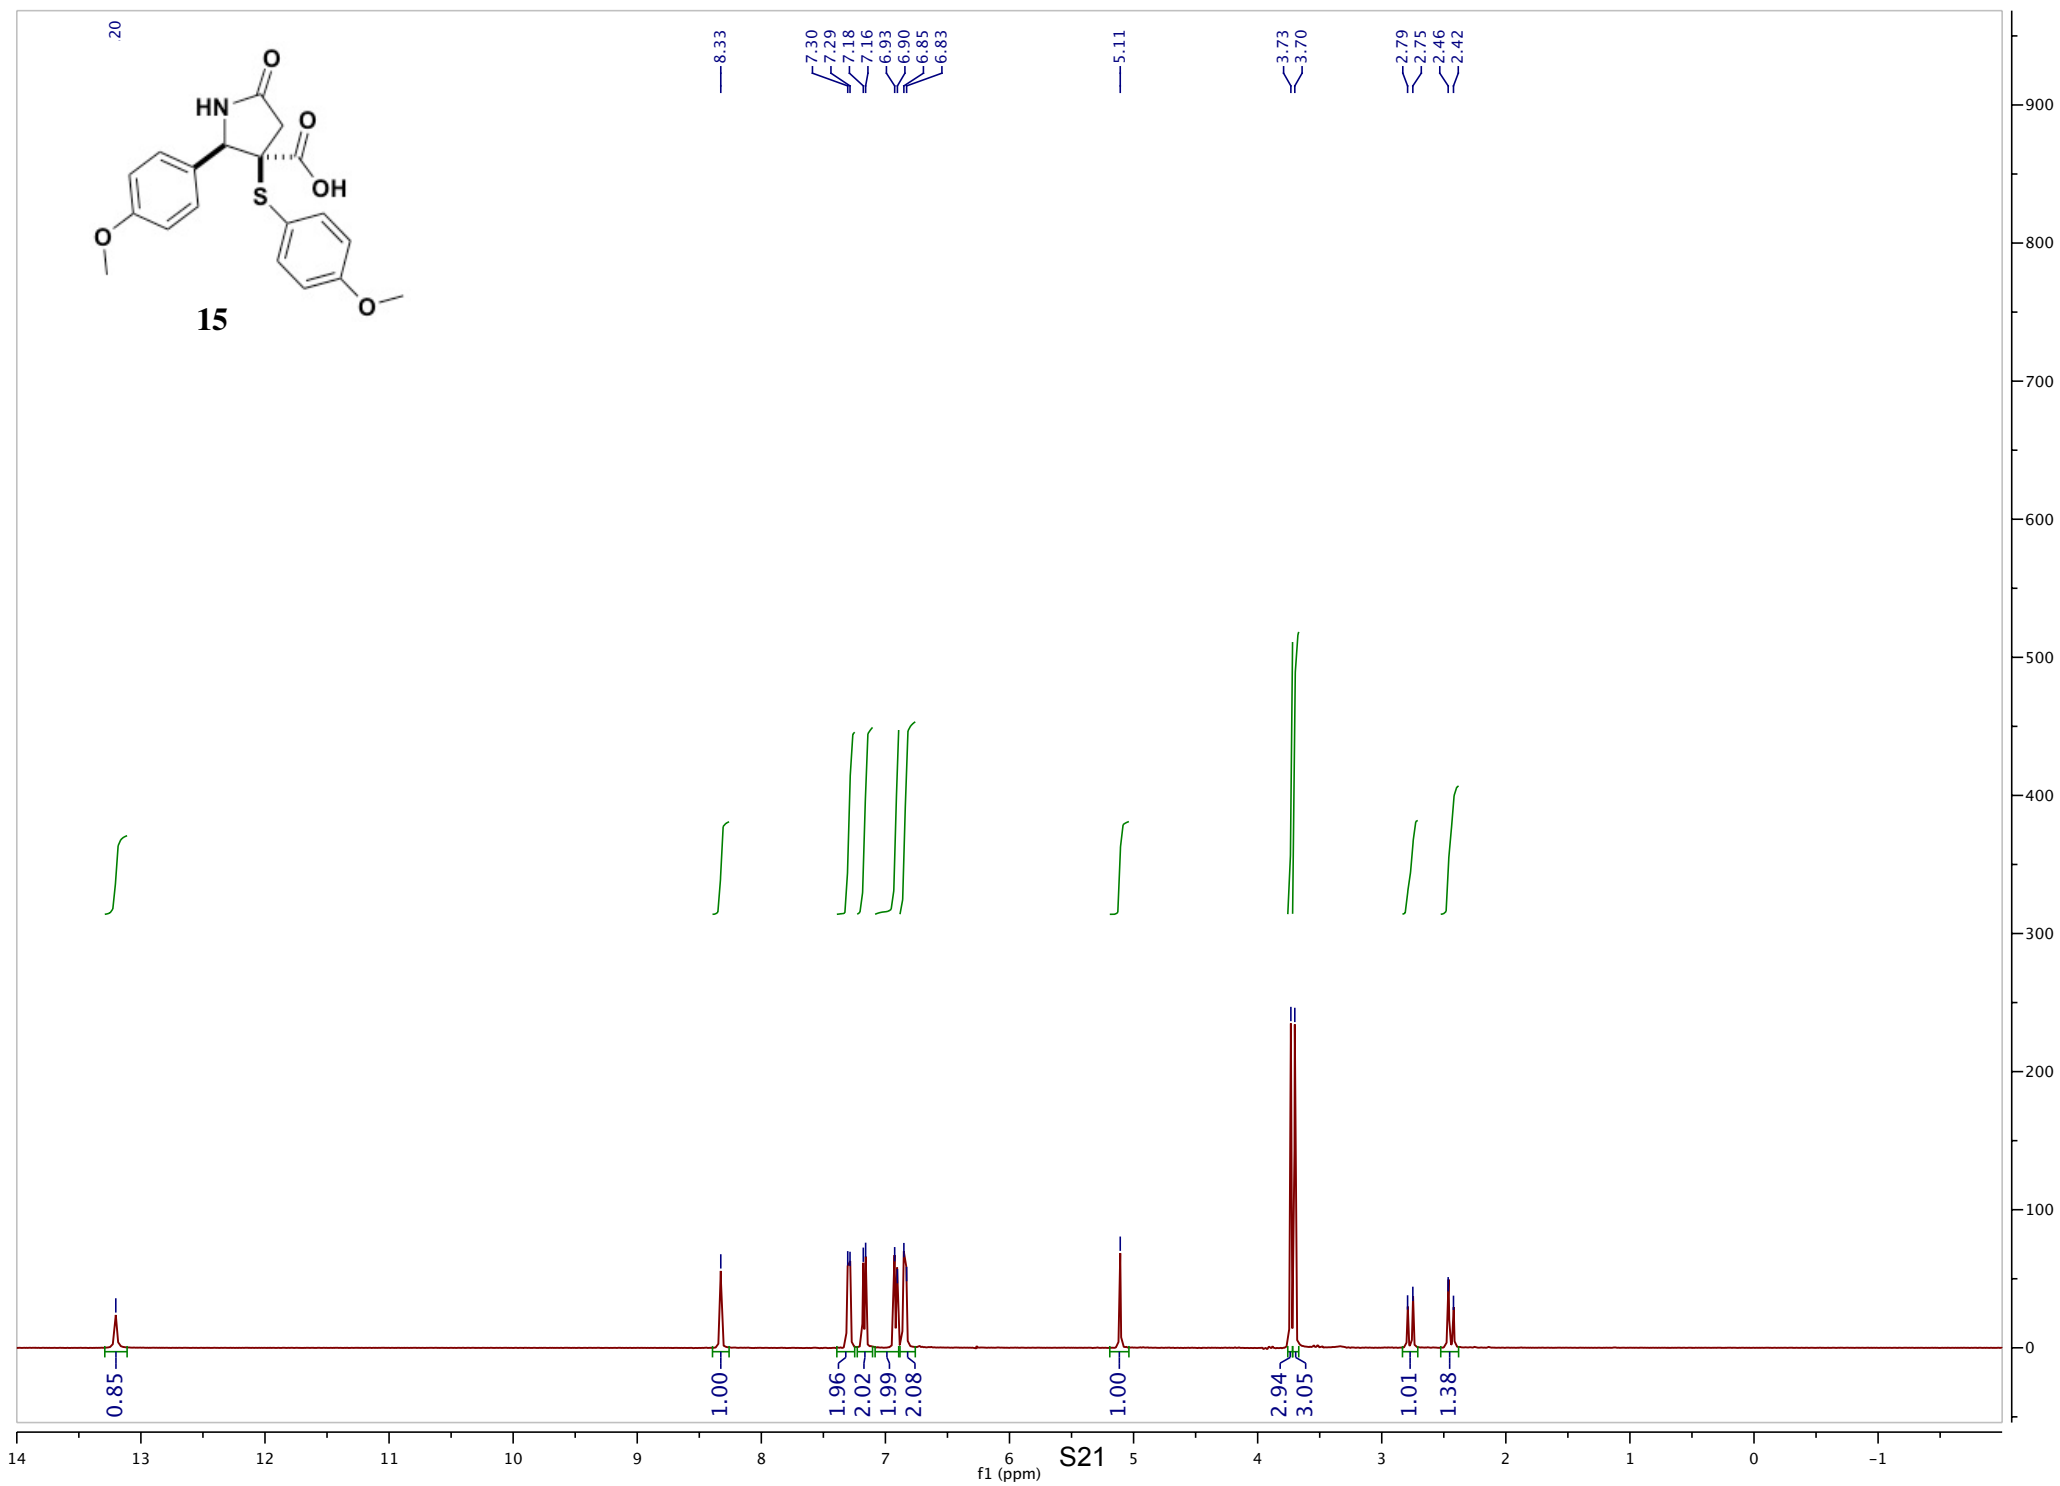

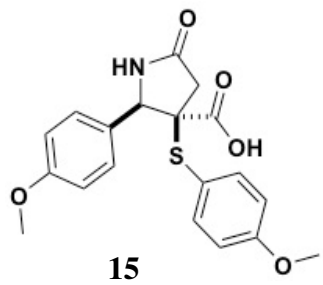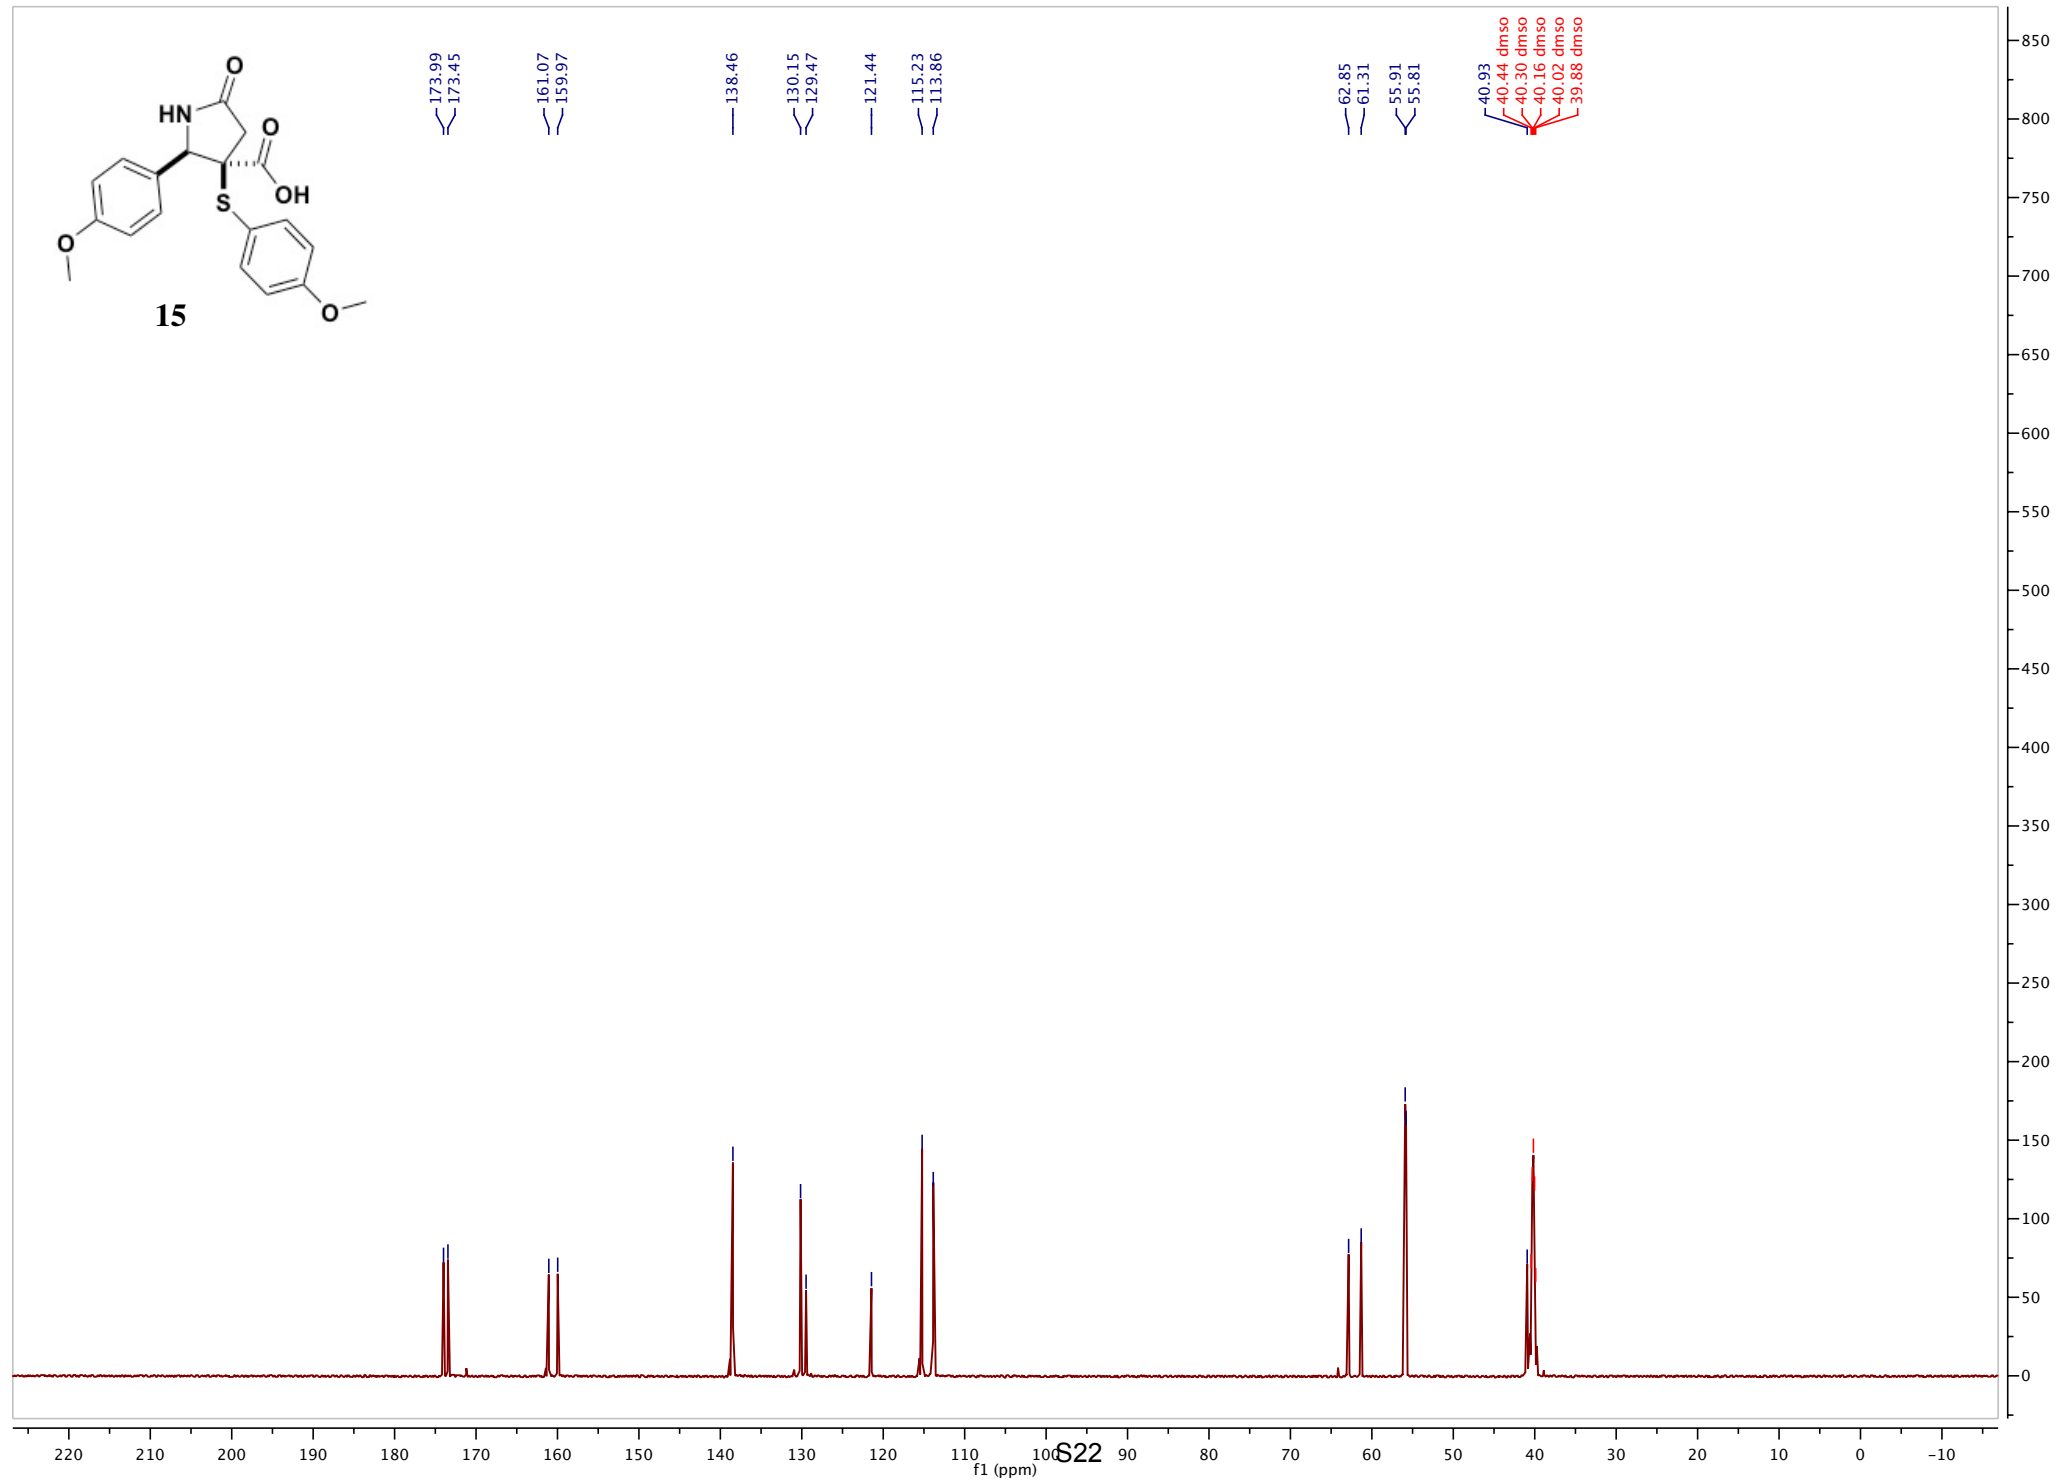

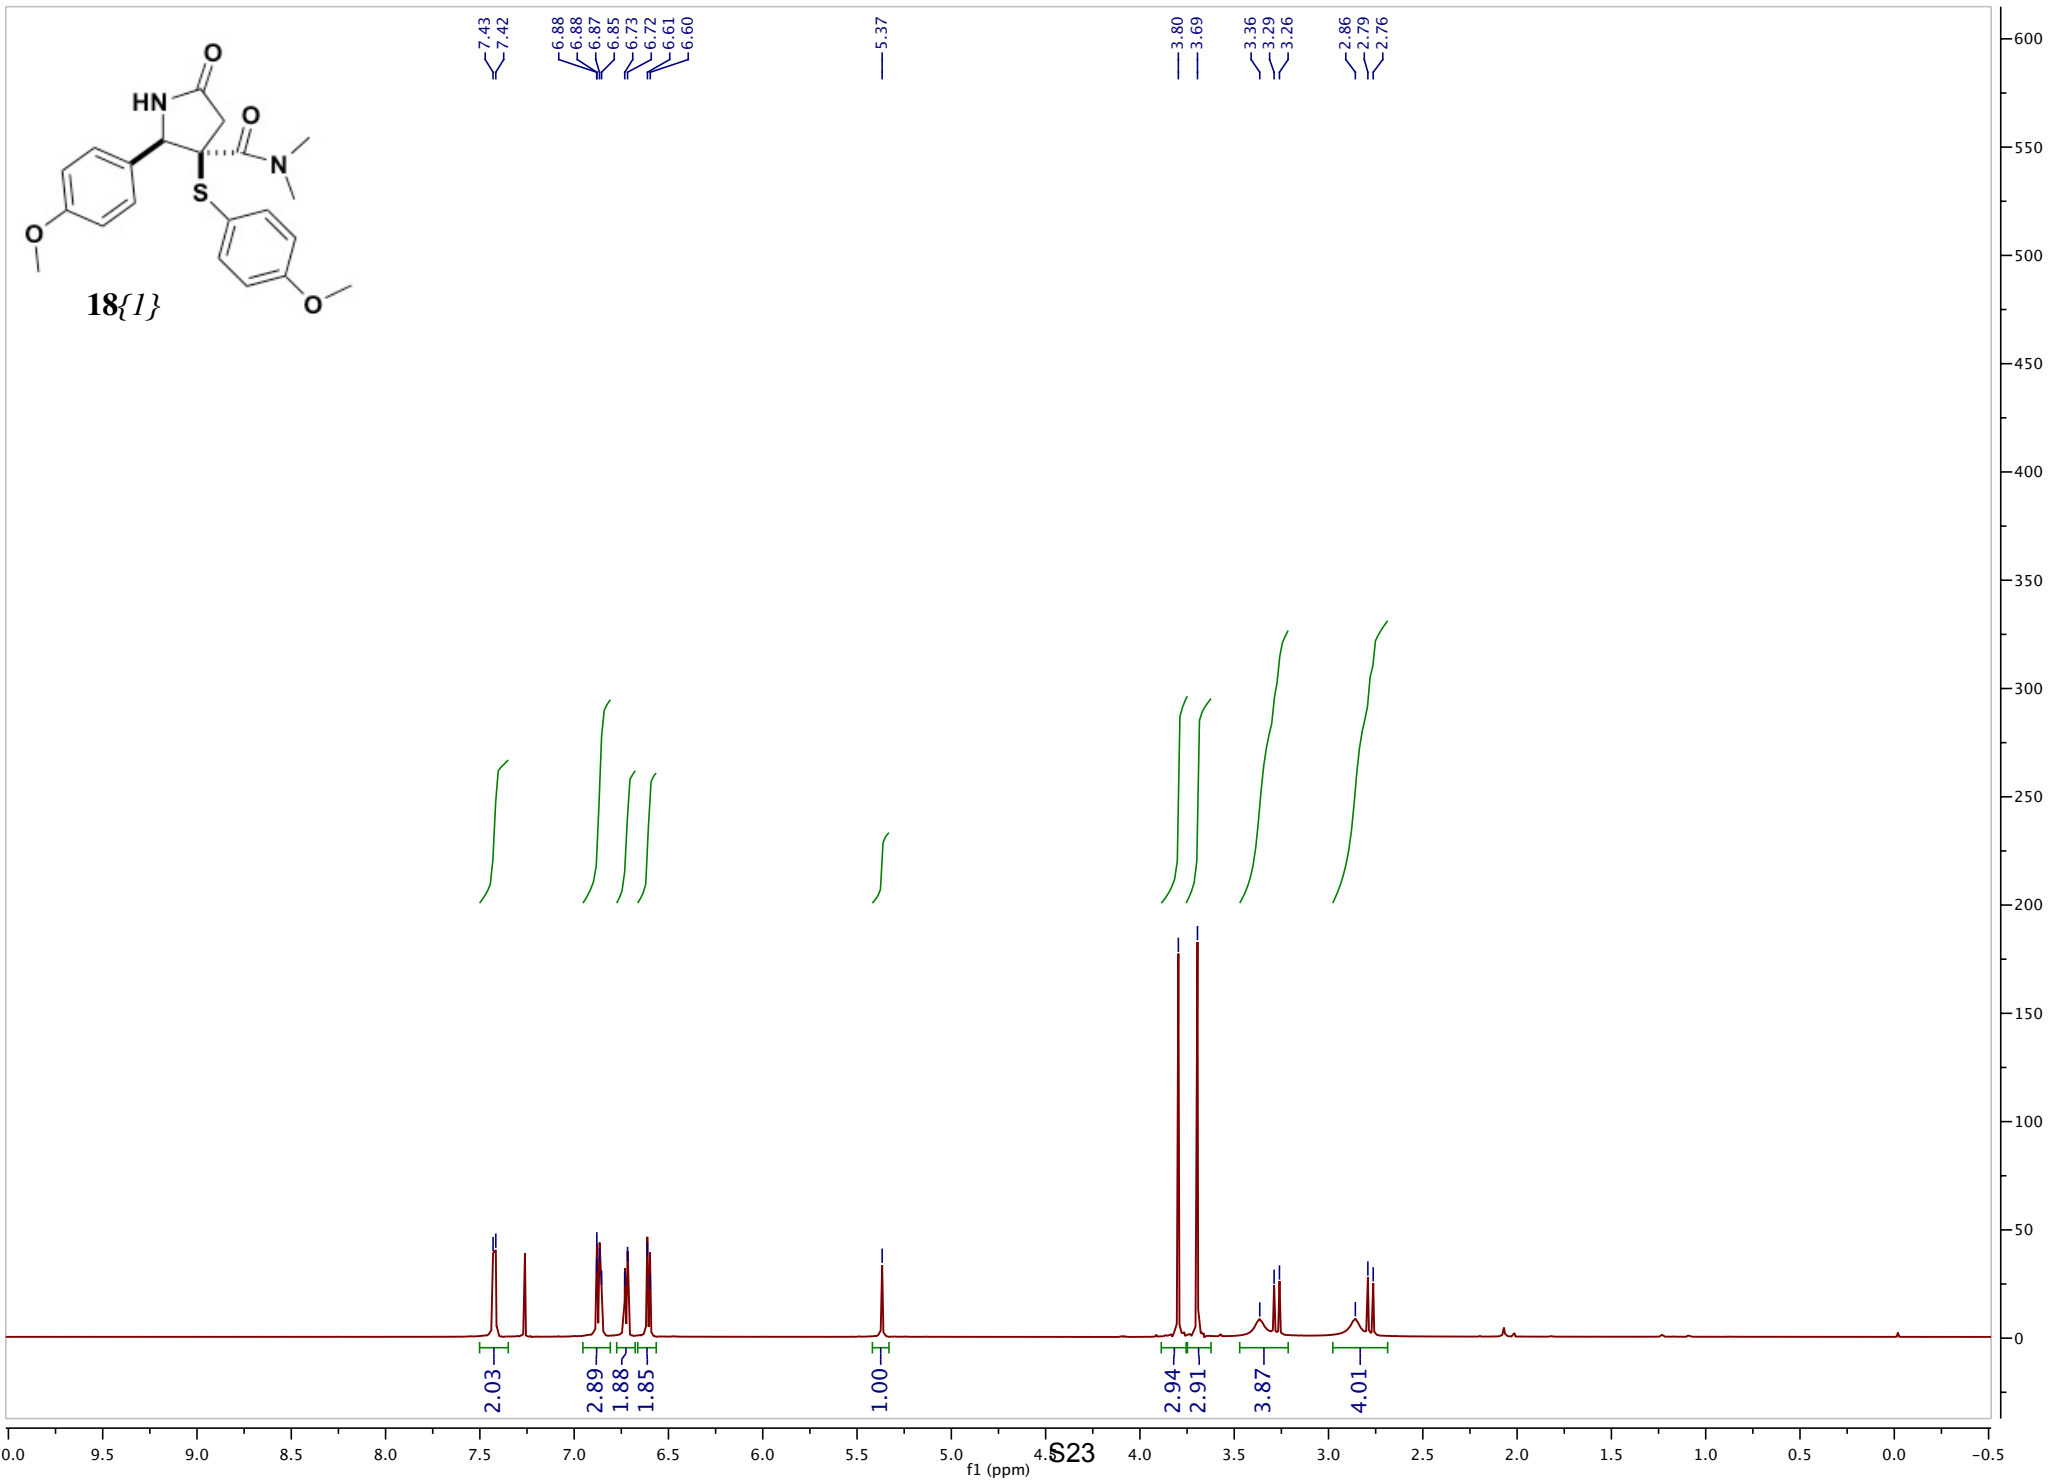

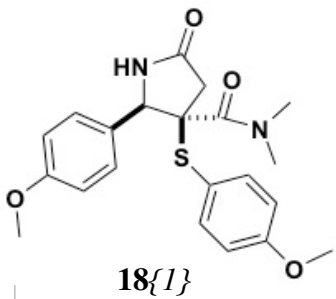

— 174.22

— 169.38

— 160.33

— 159.82

— 136.38

— 130.27

— 129.07

— 120.99

— 114.16

— 113.54

77.32 cdcl3

77.11 cdcl3

76.90 cdcl3

— 63.40

— 61.59

— 55.32

— 55.19

— 43.13

— 39.17

— 37.84

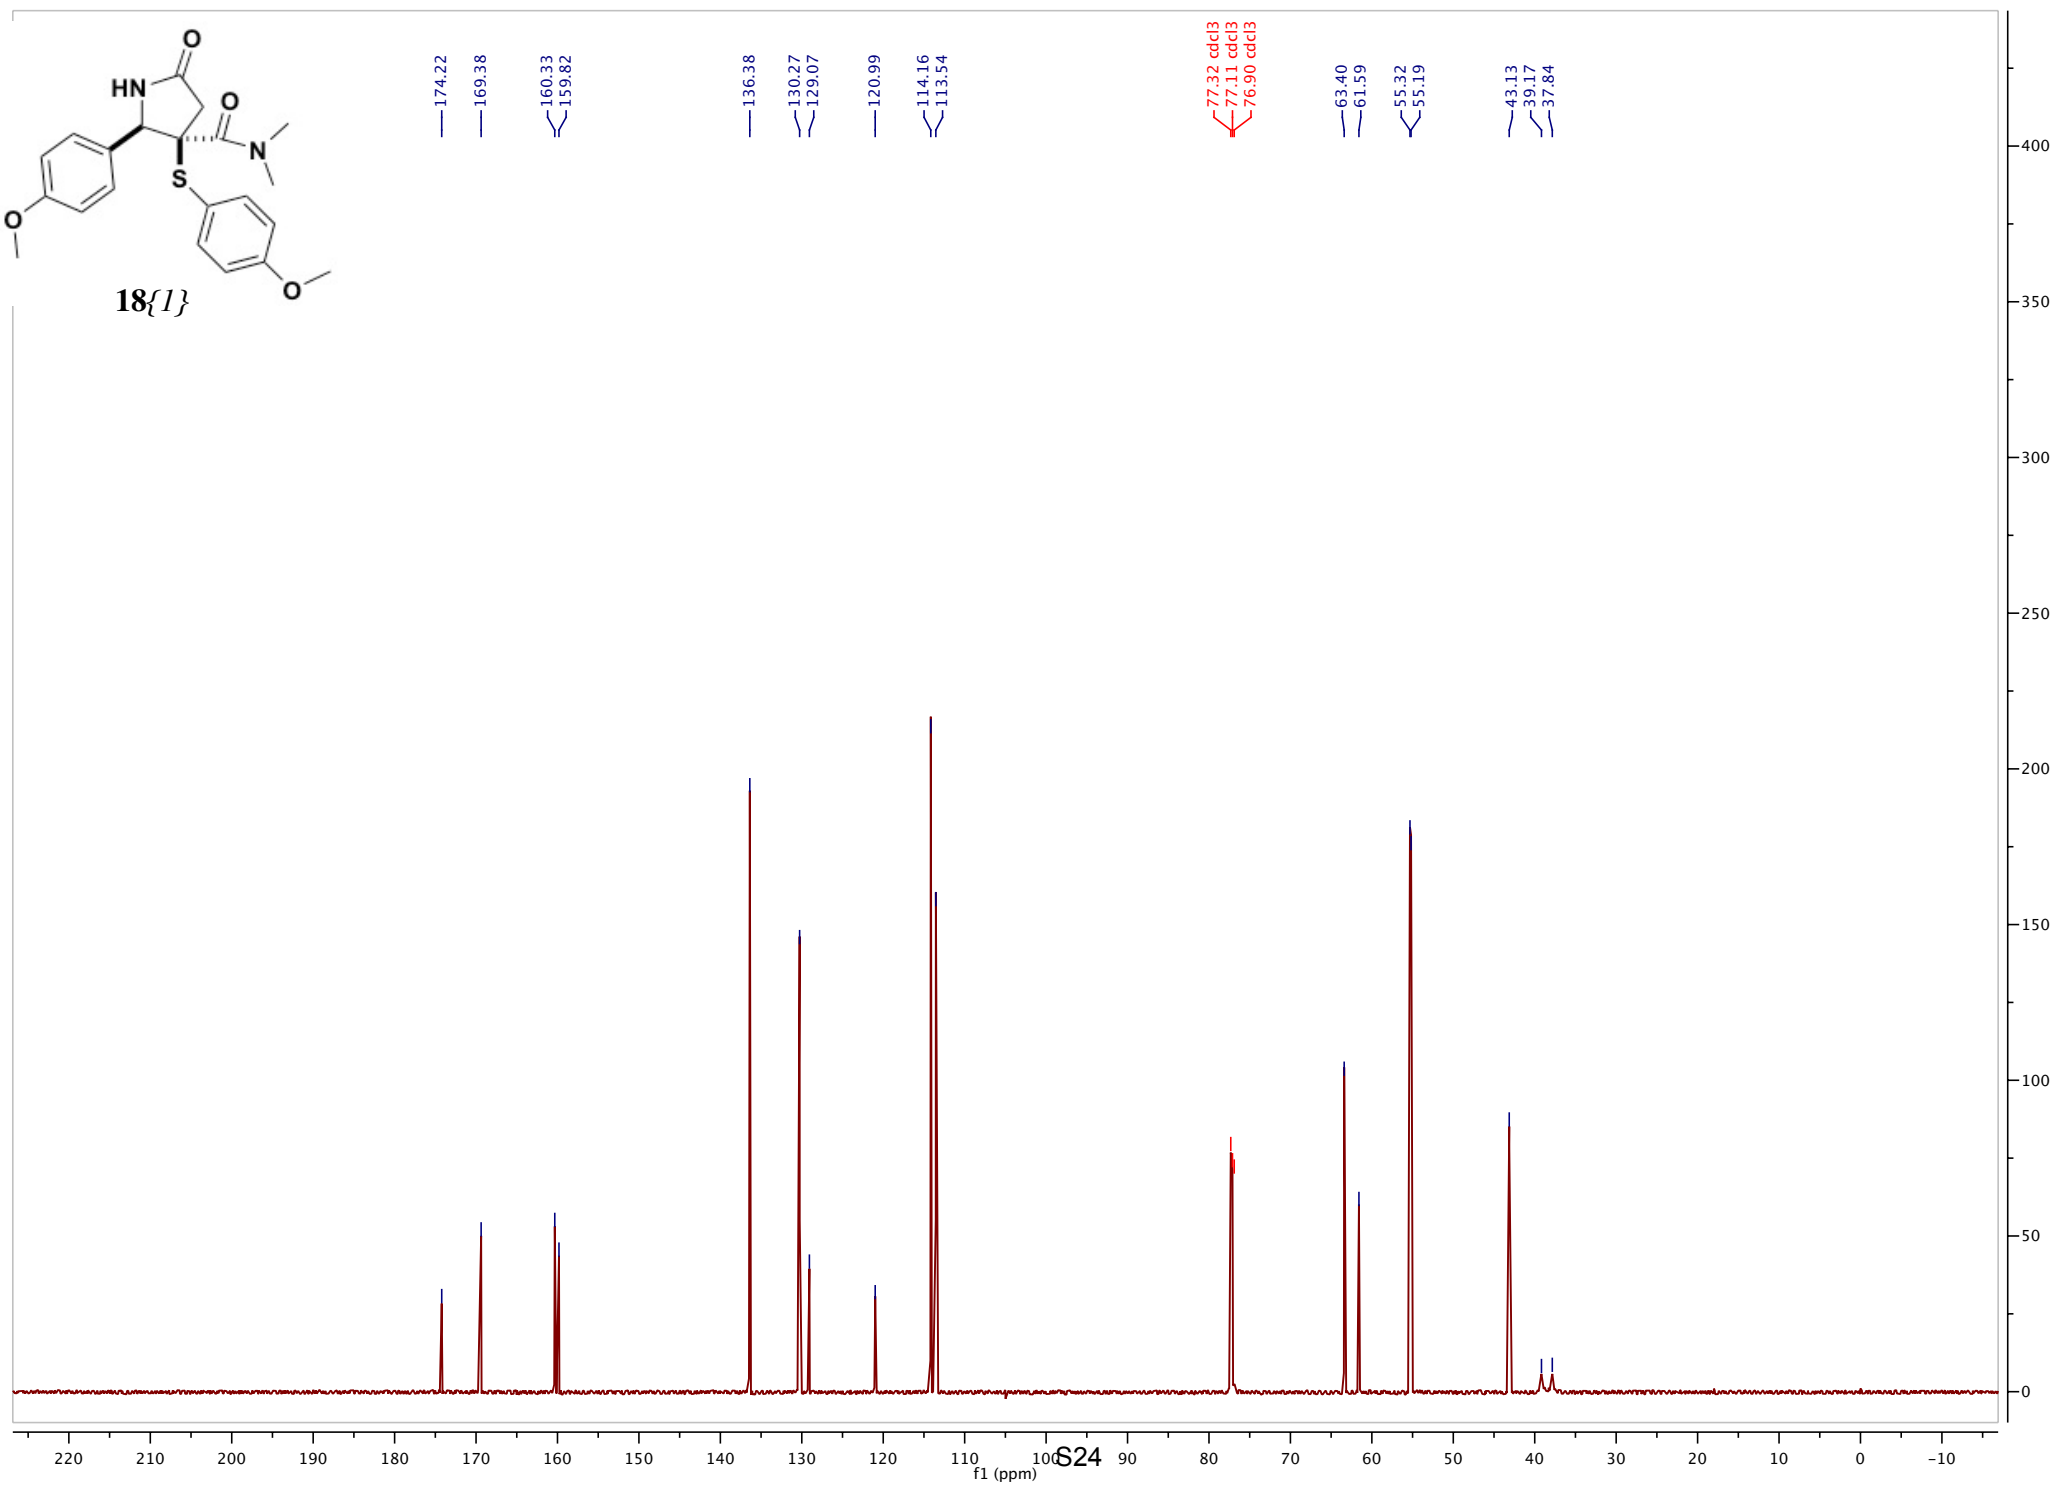

f1 (ppm)

S24



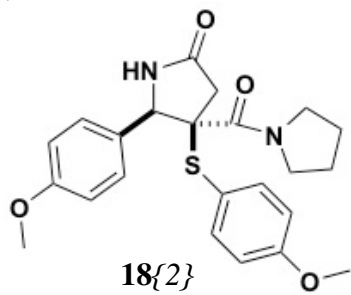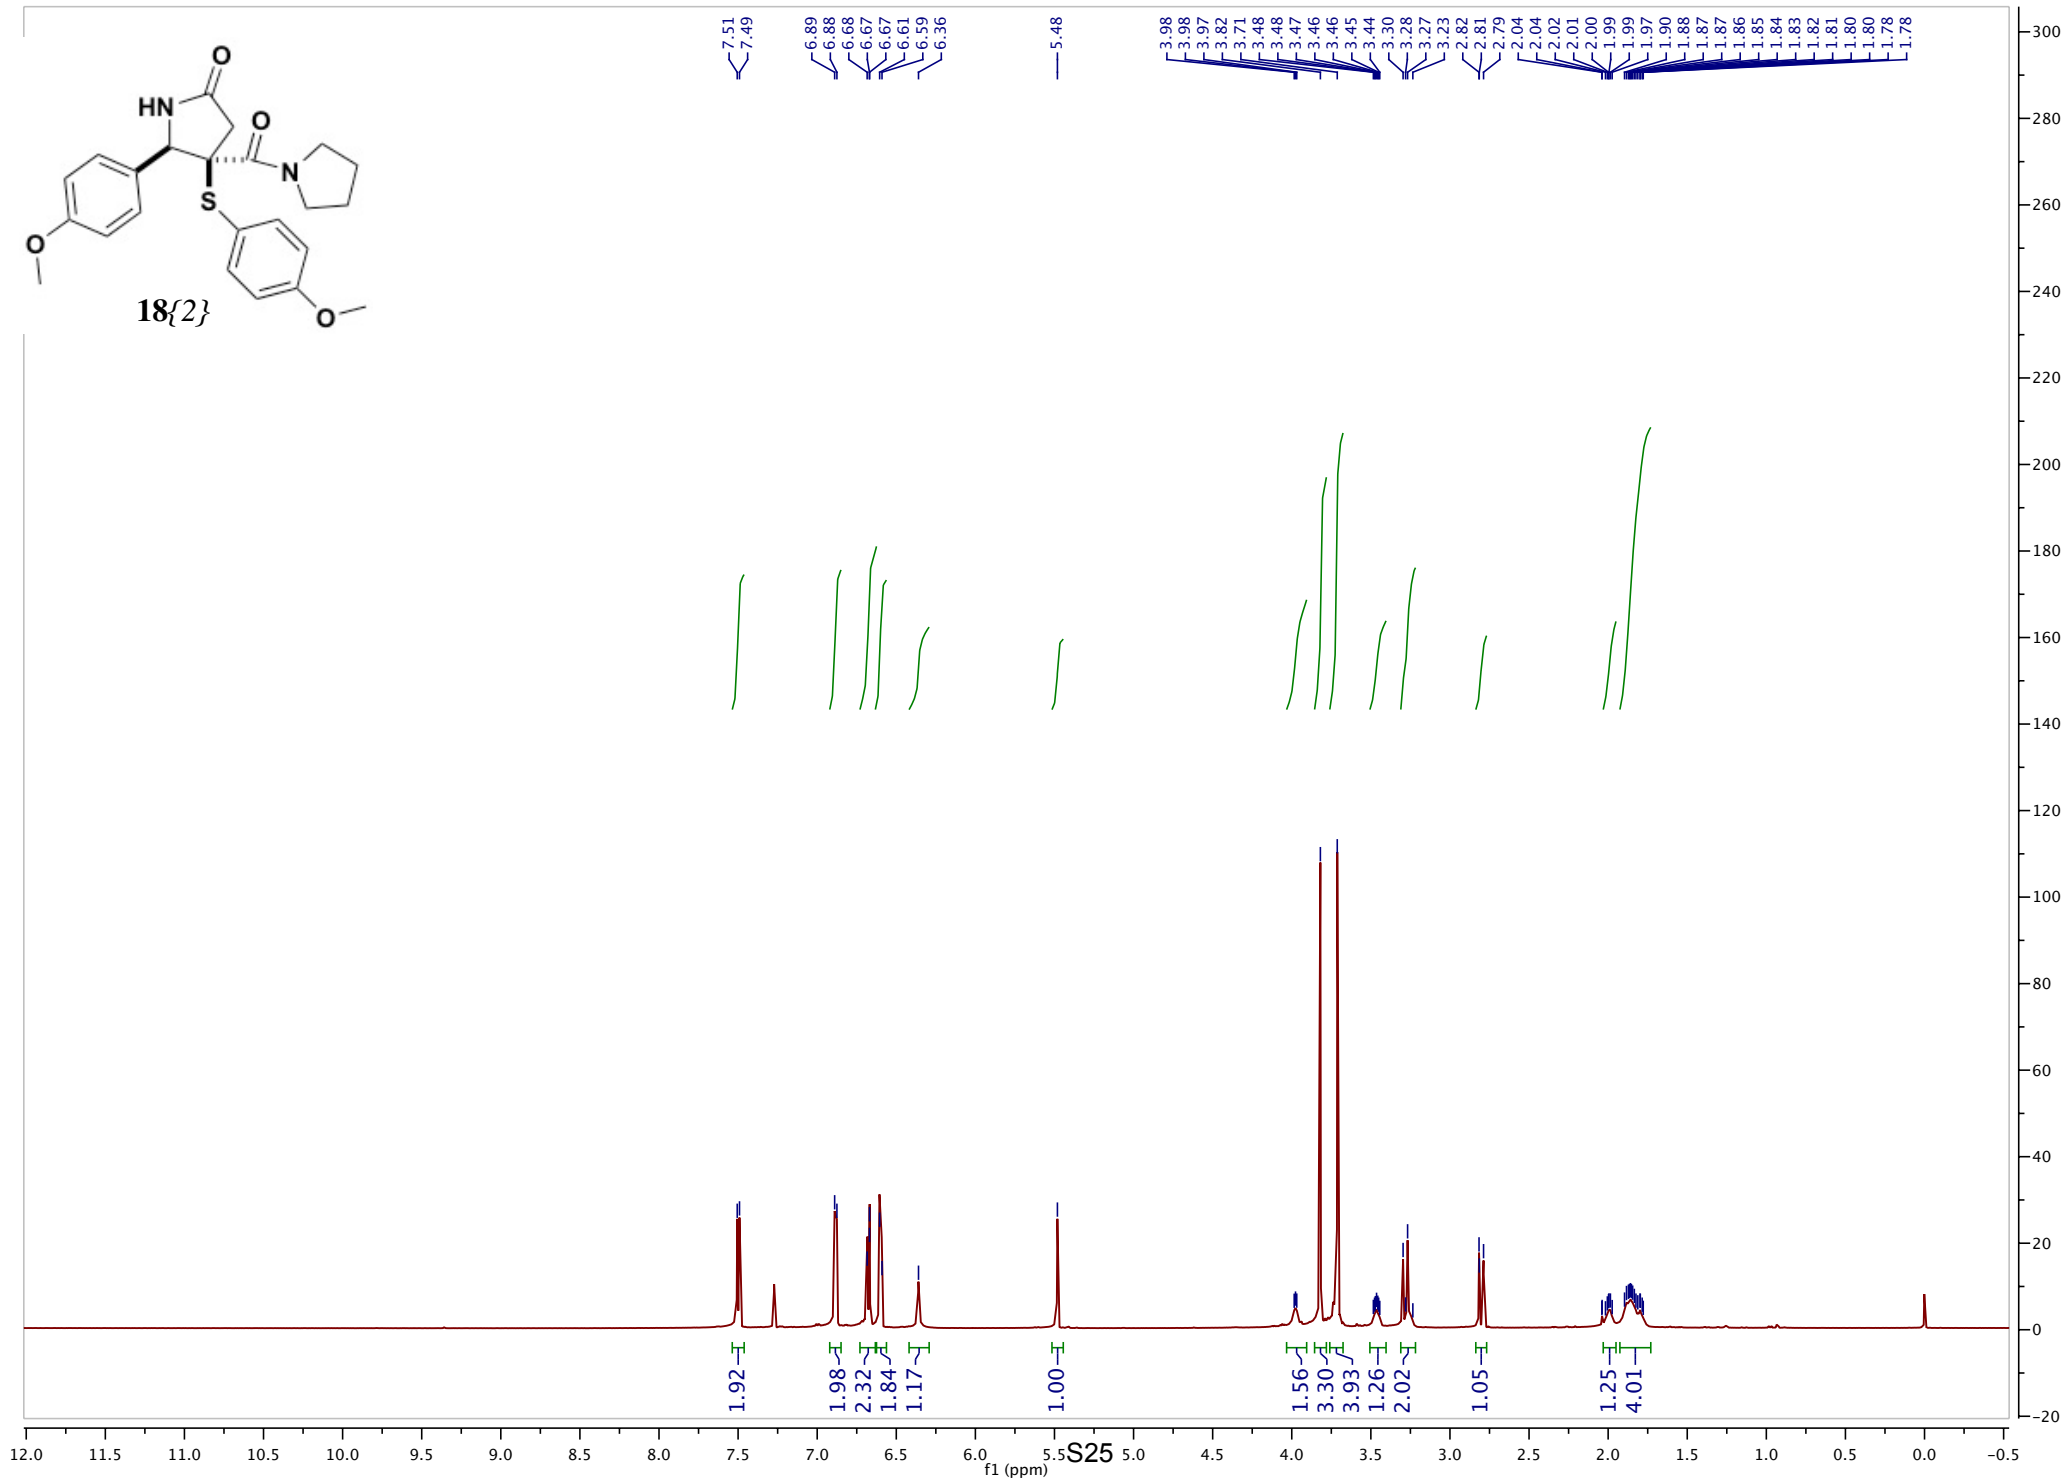

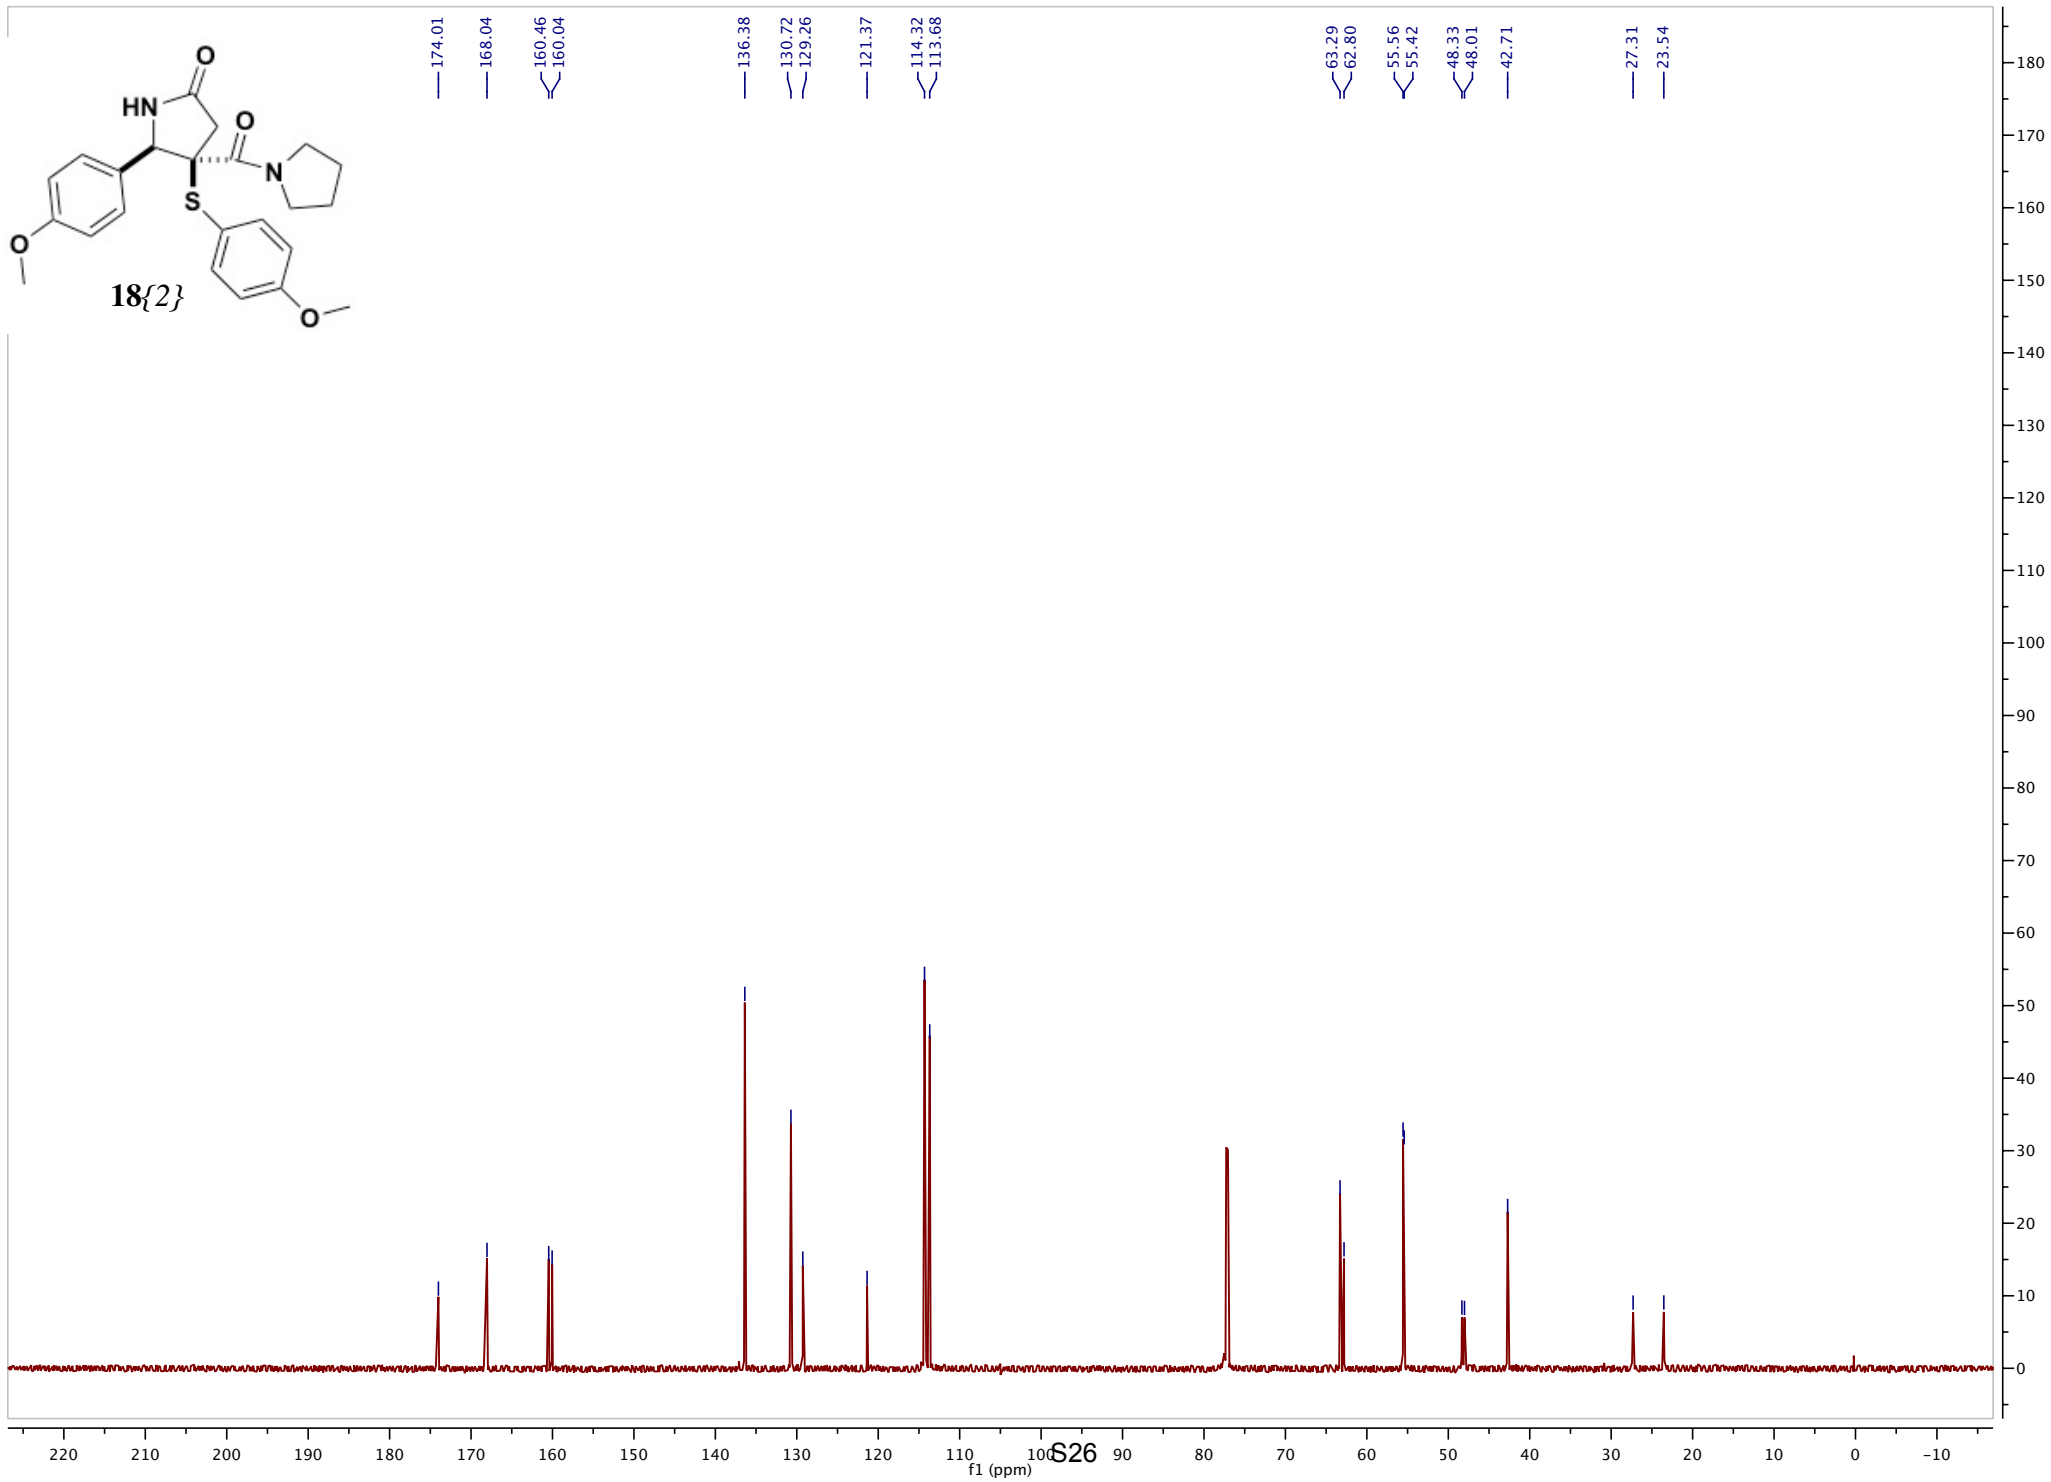

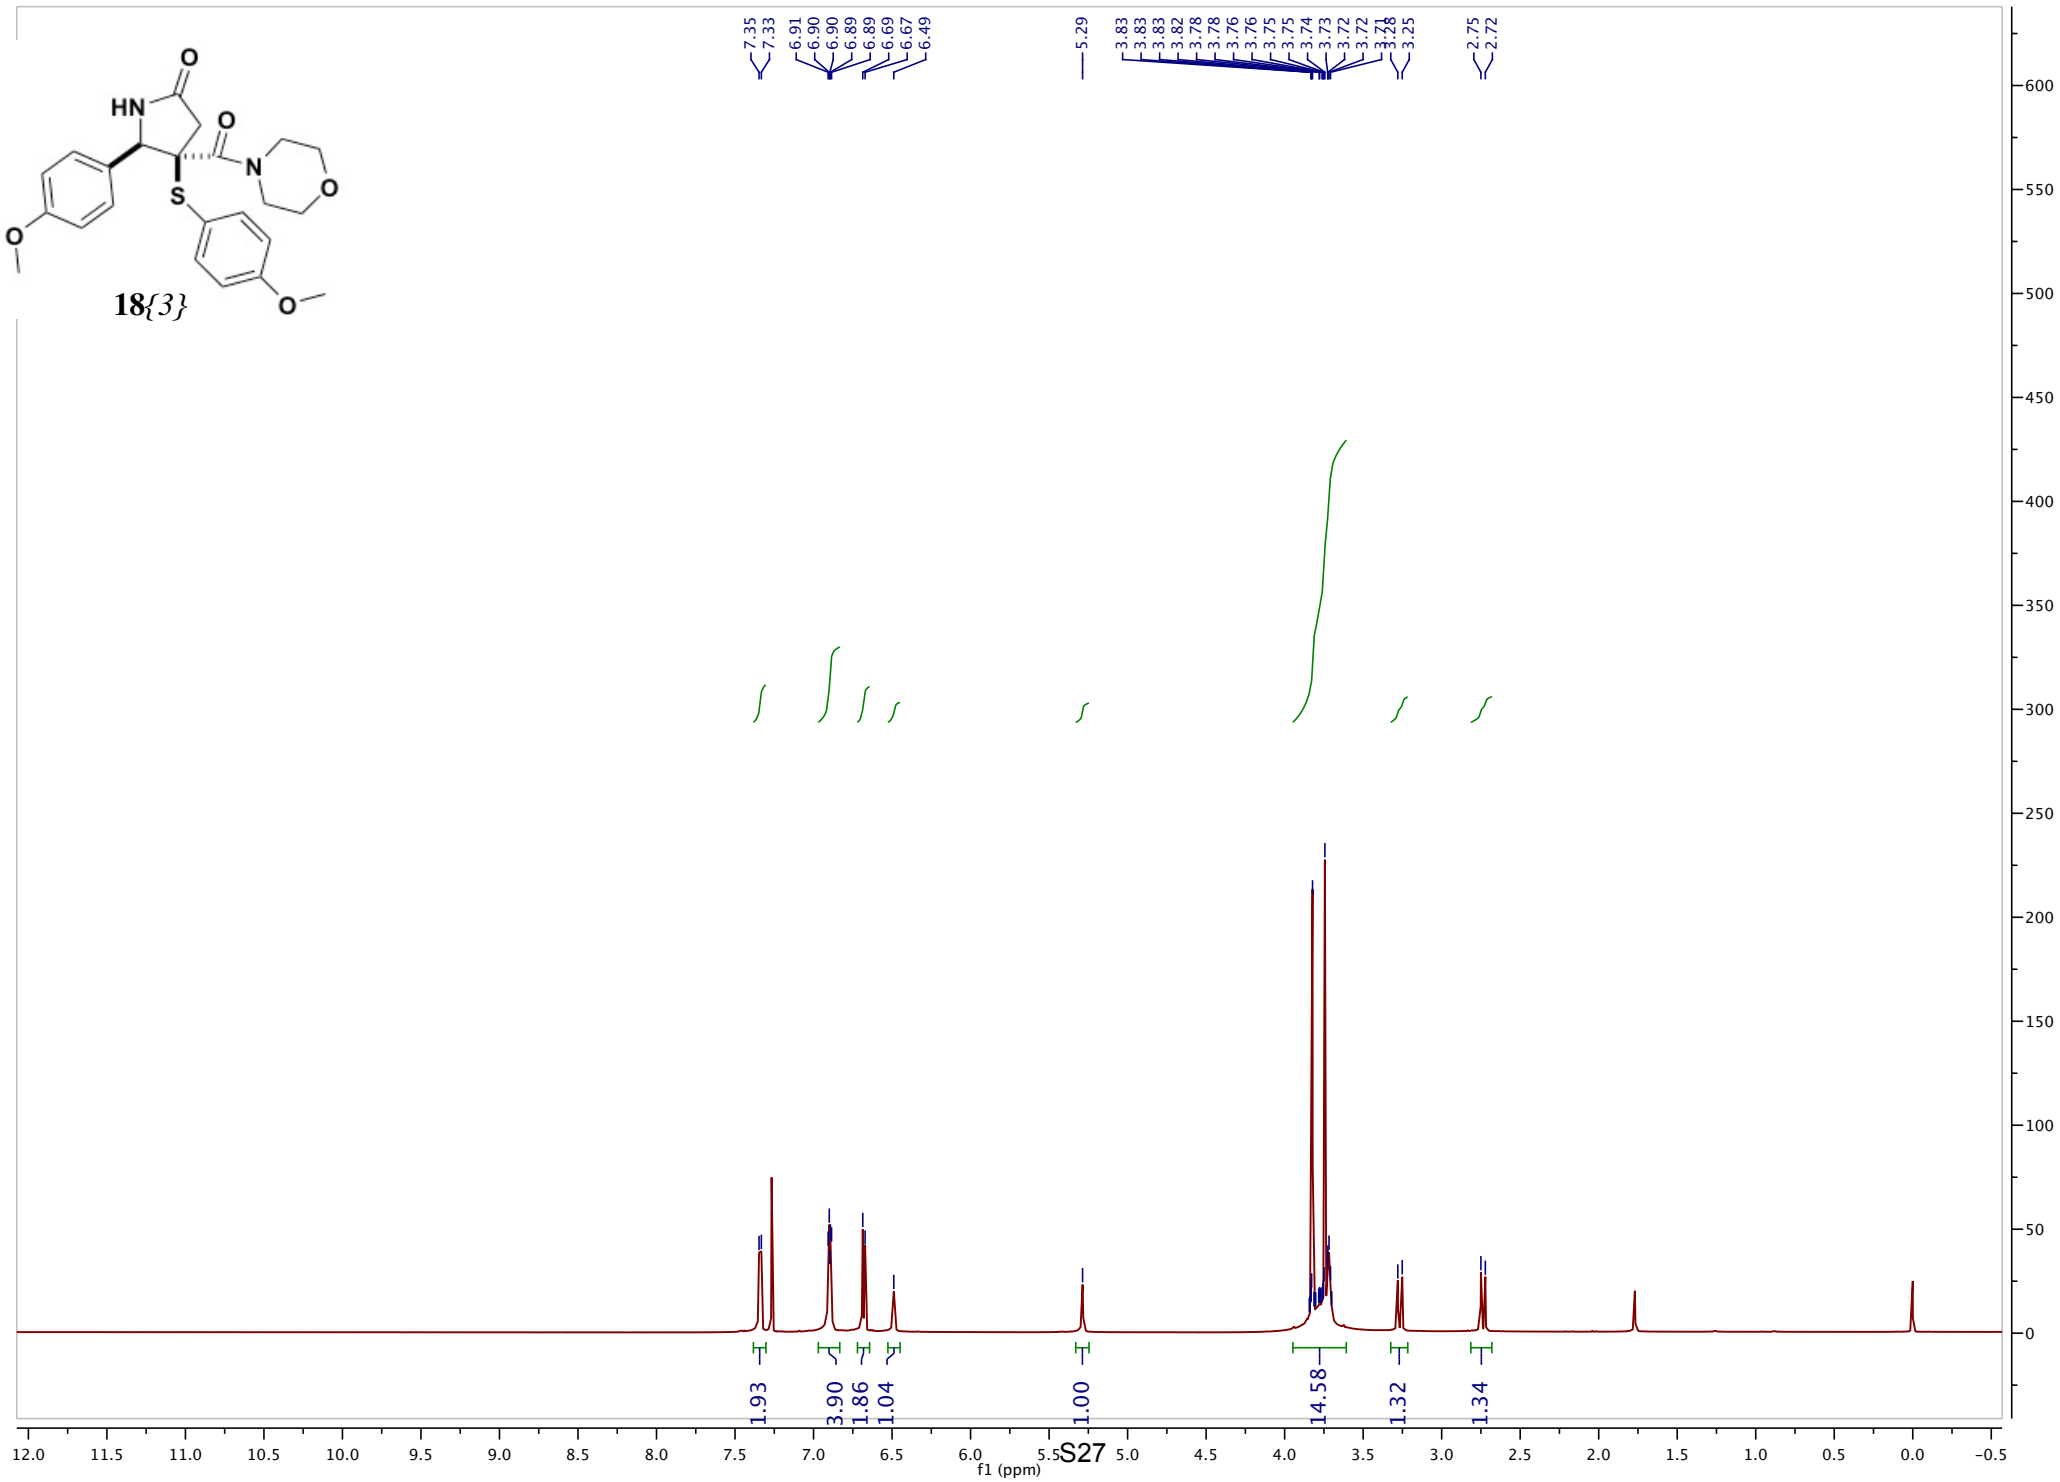

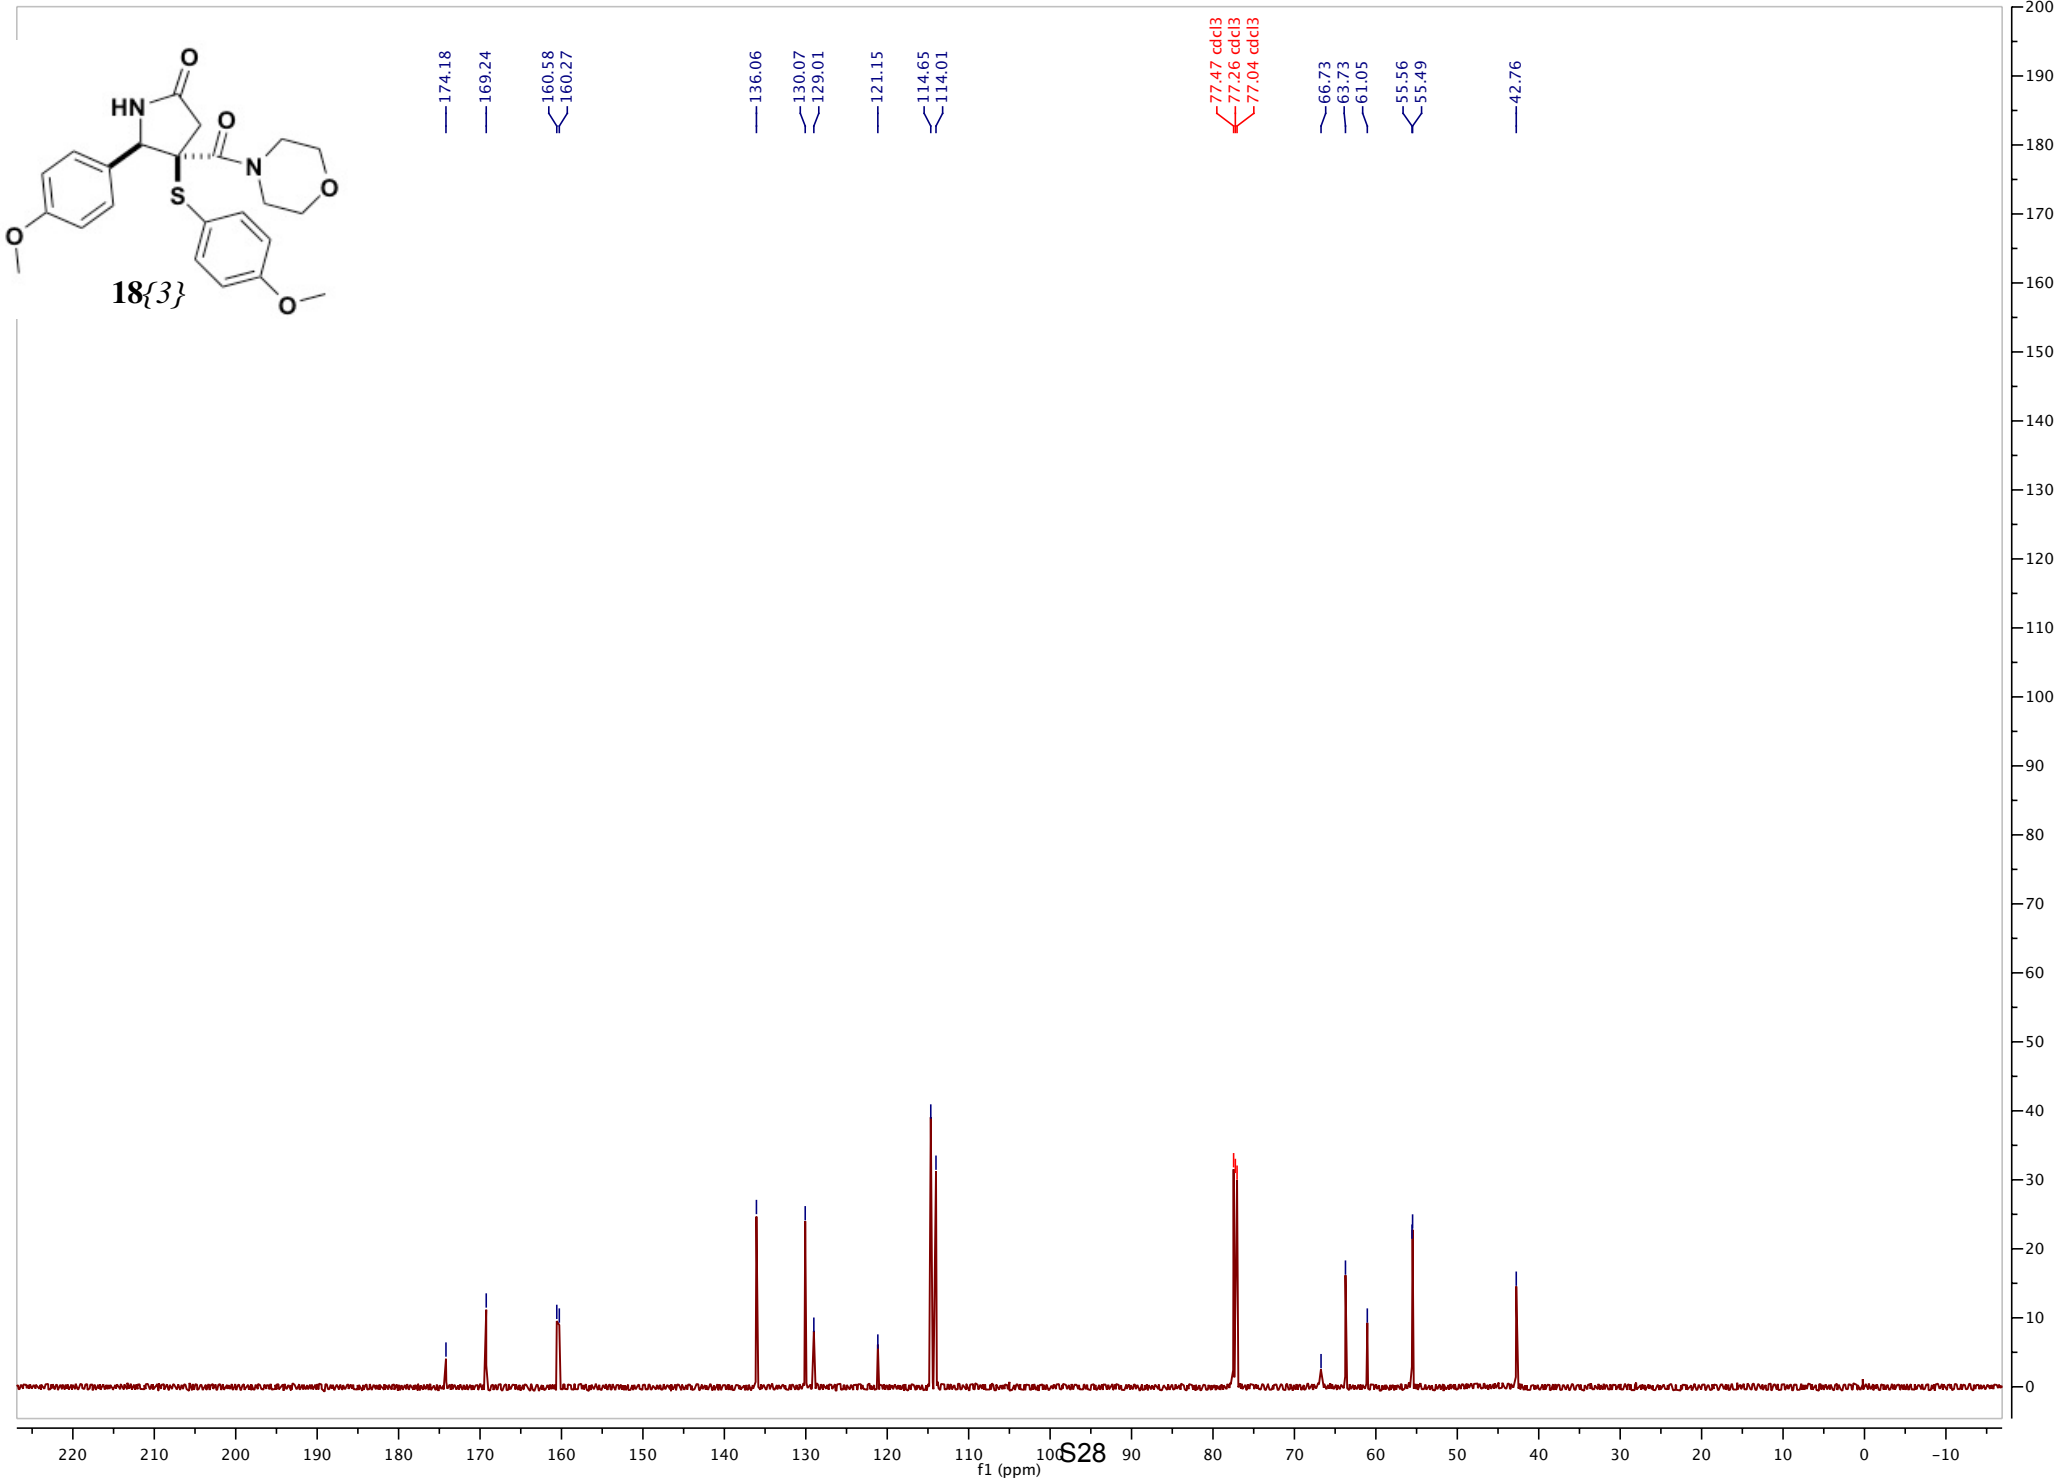

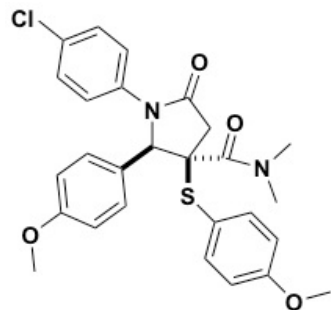

19{1,7}

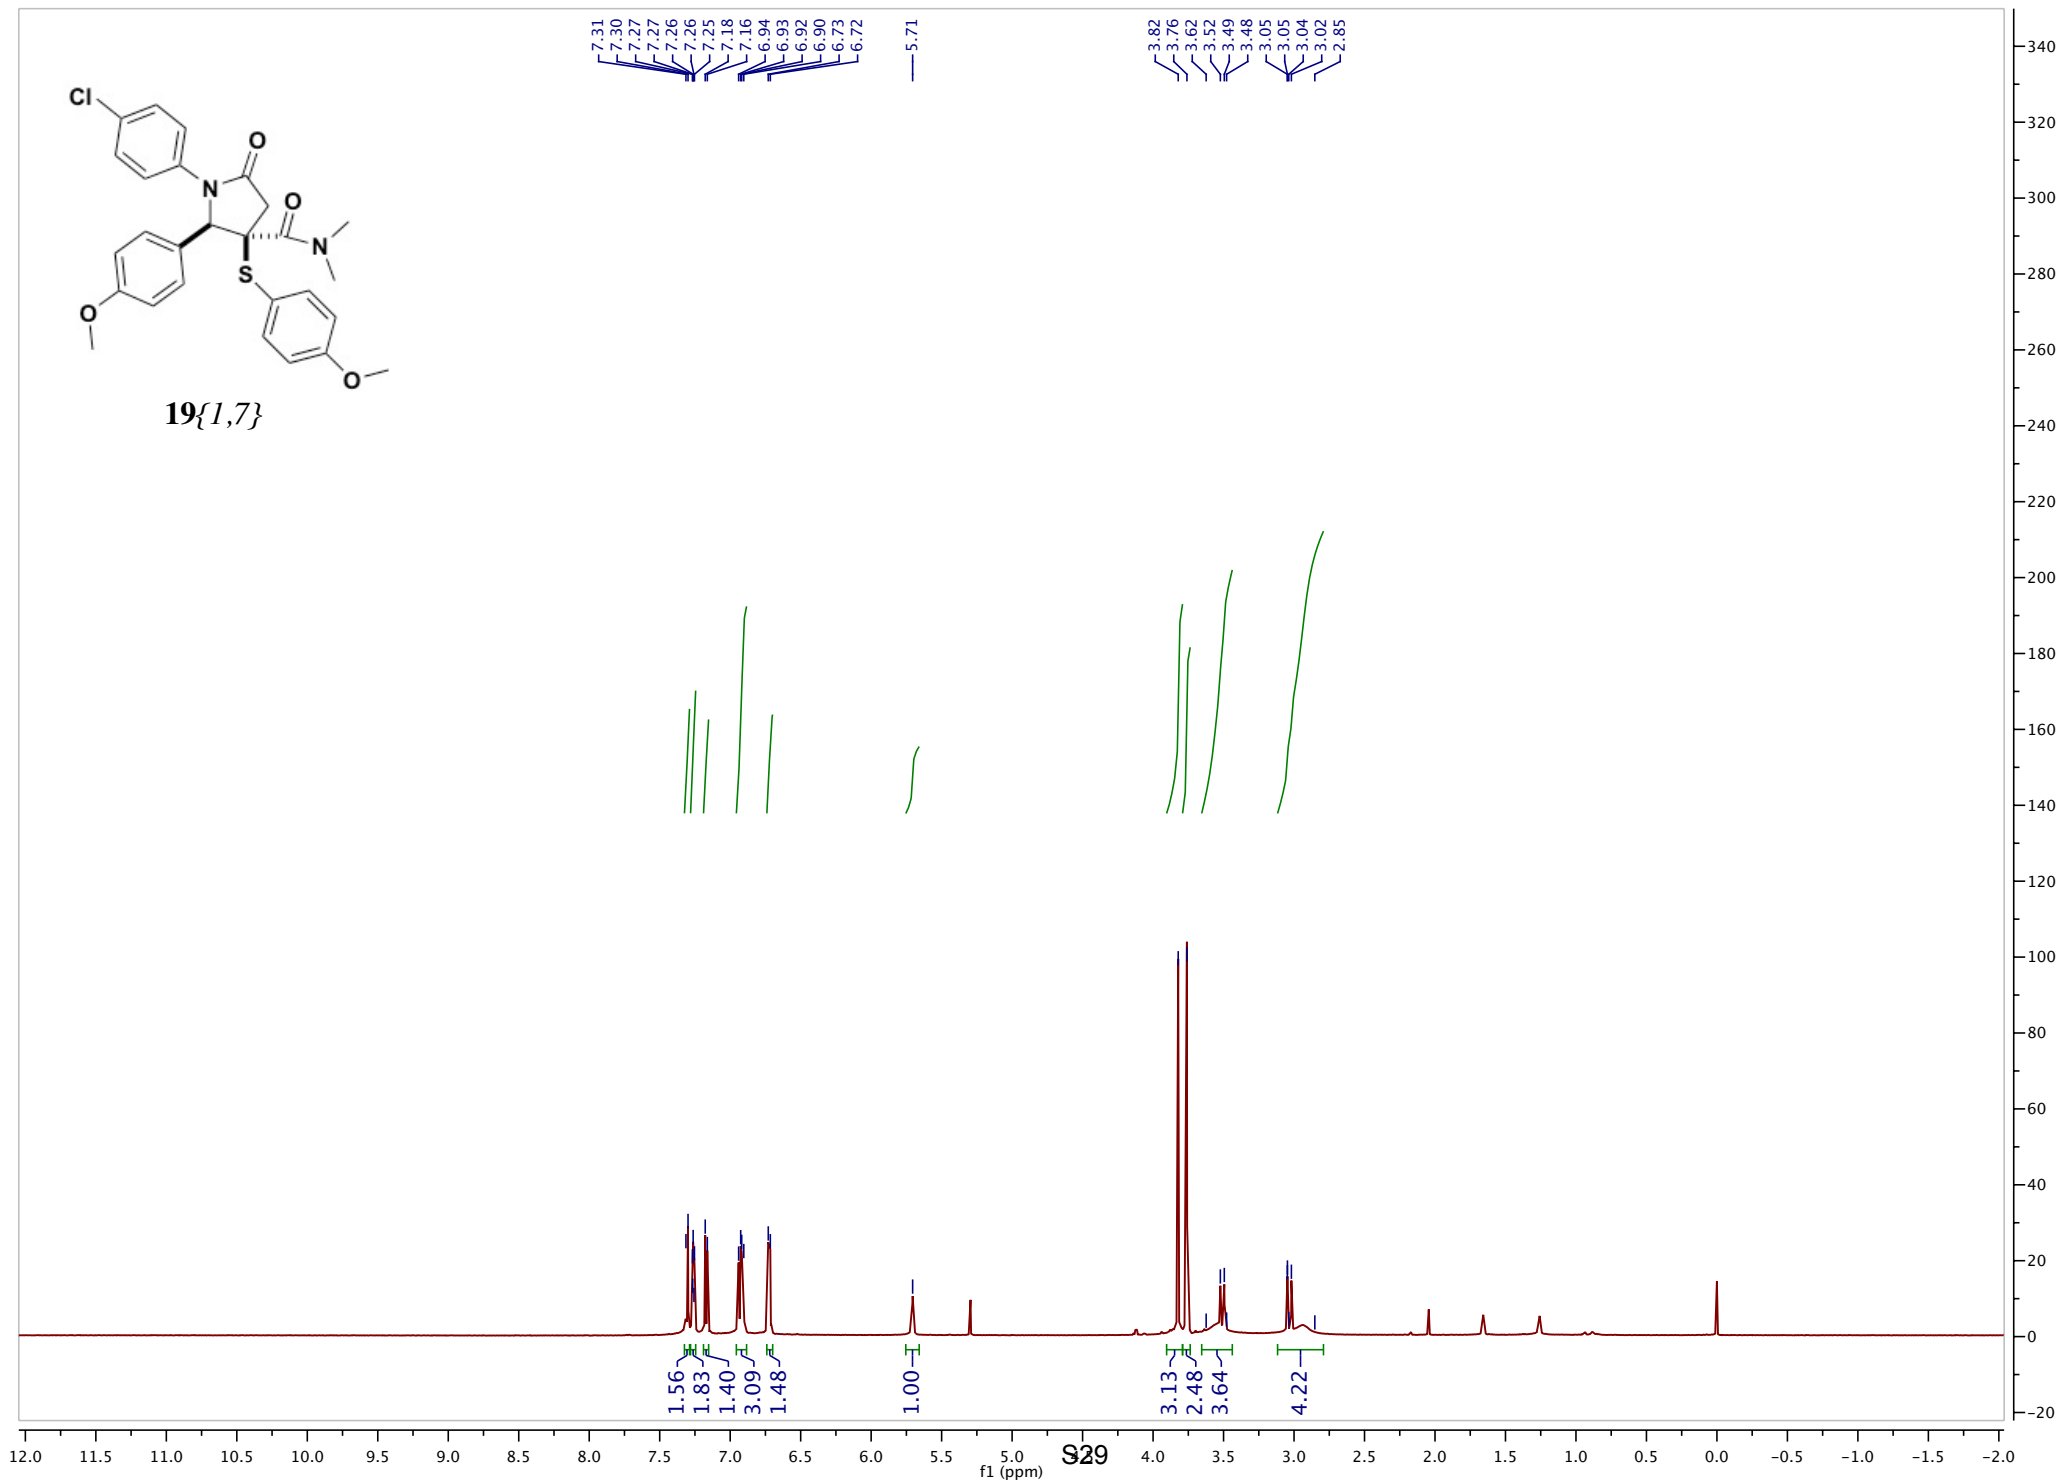

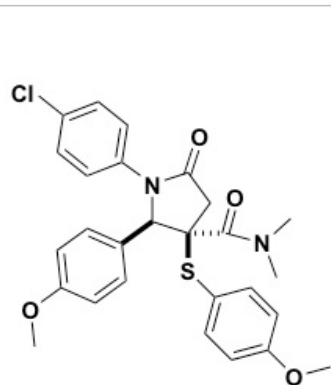

**19{1,7}**

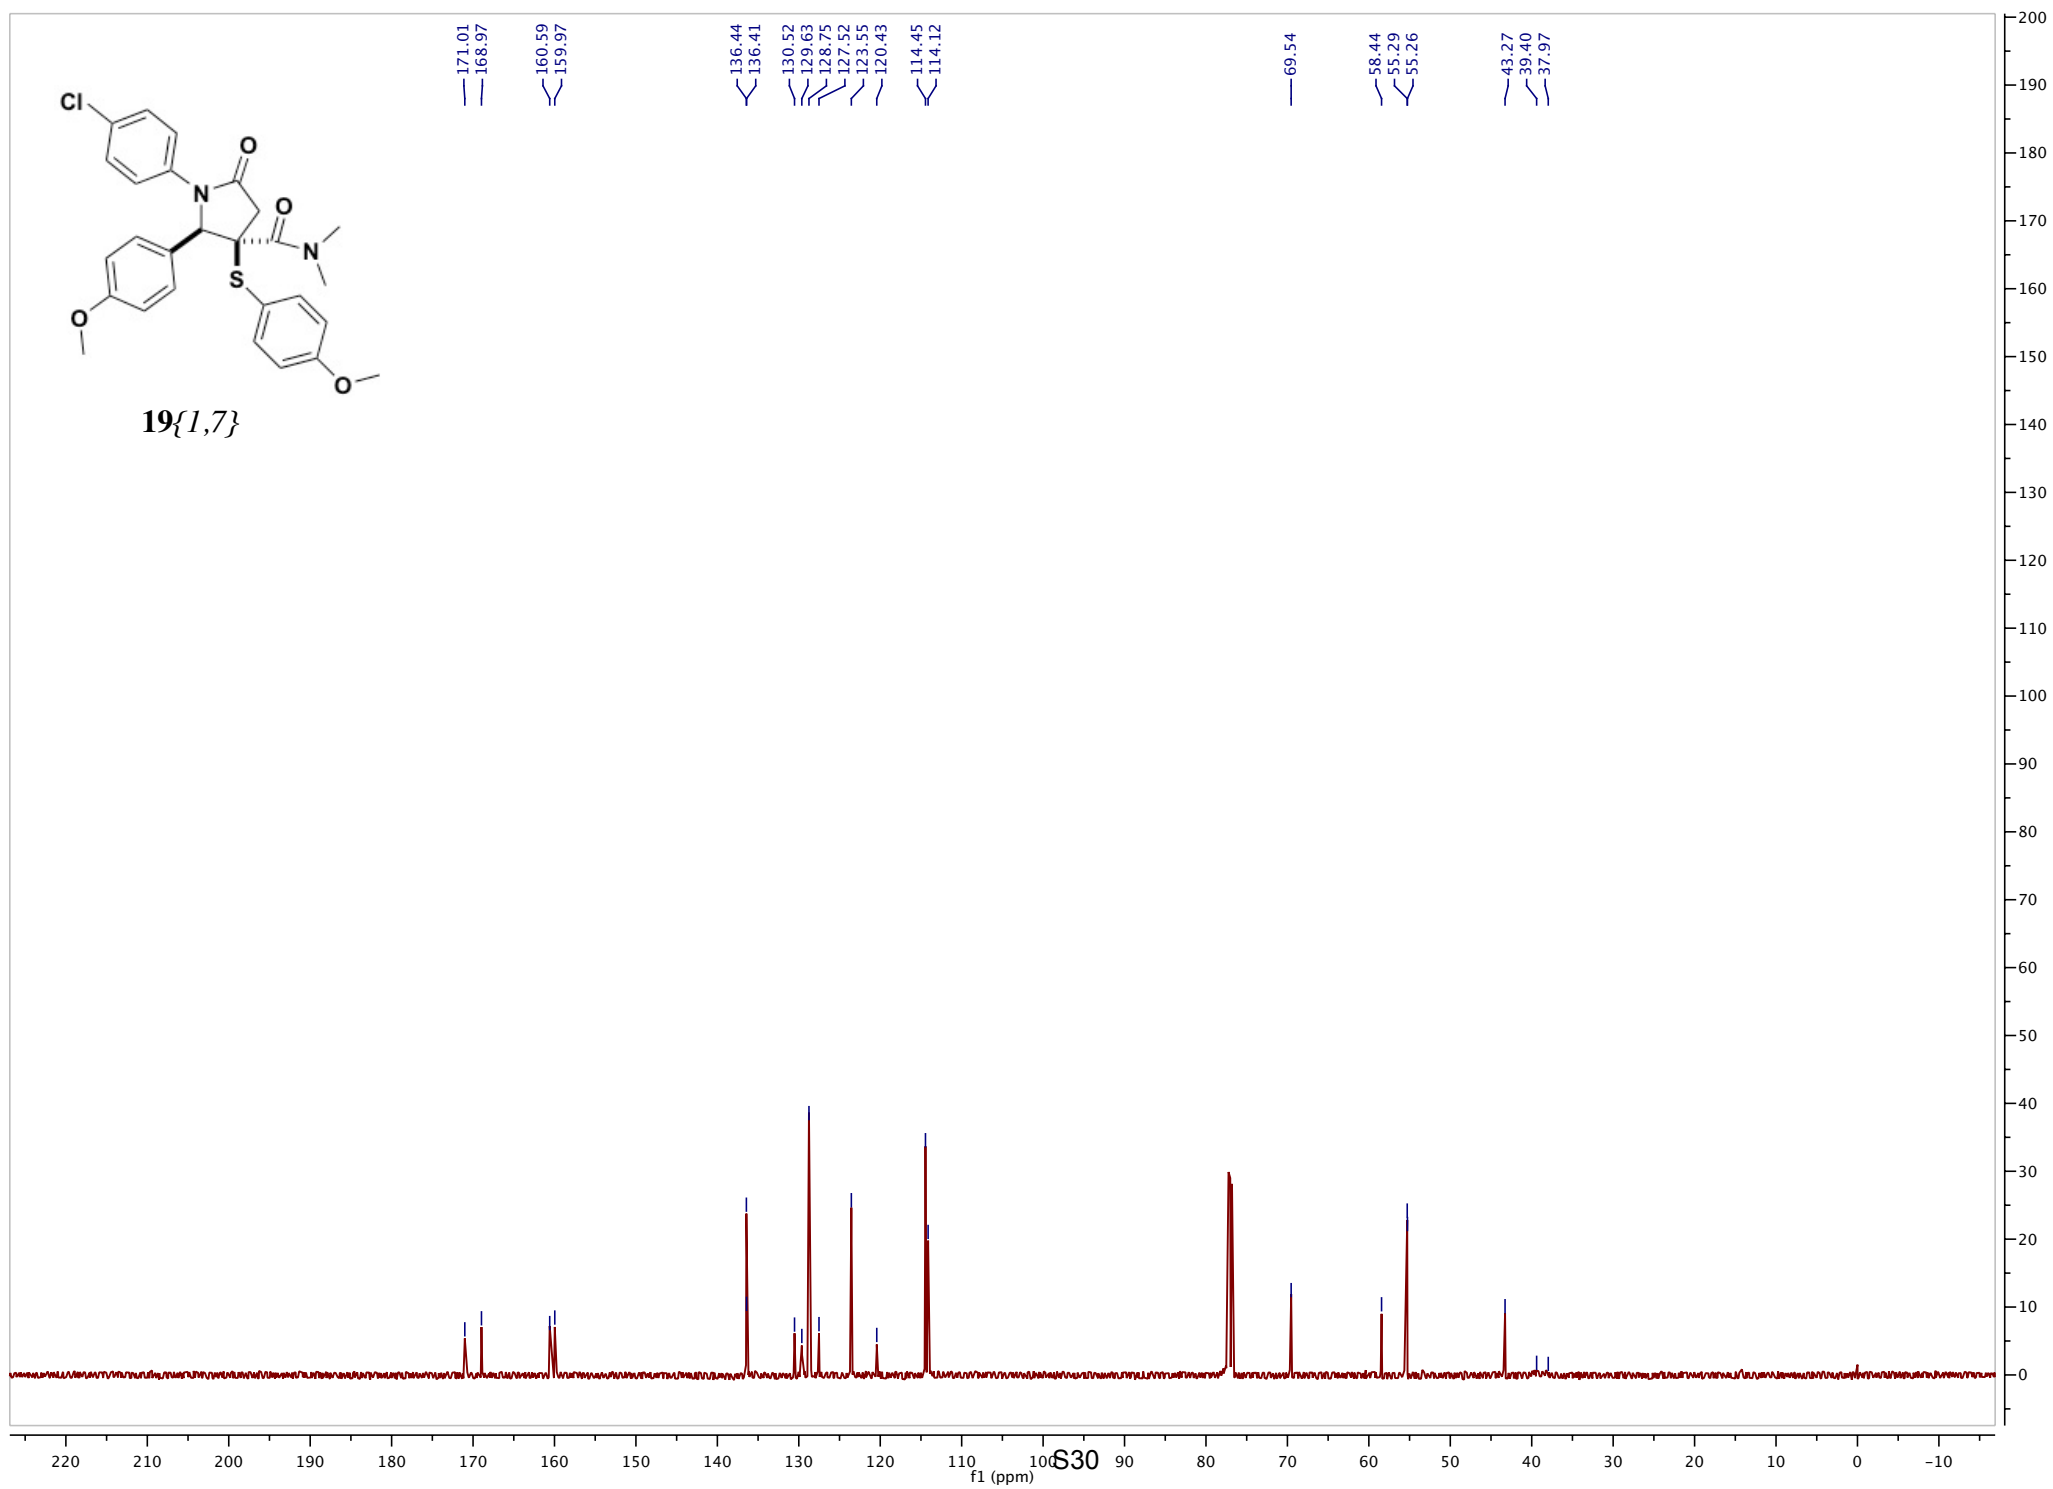

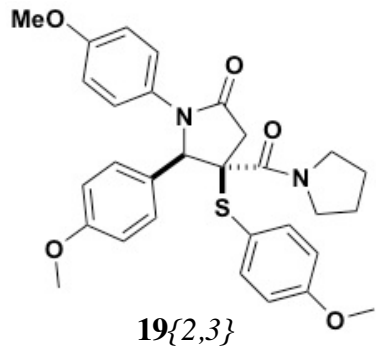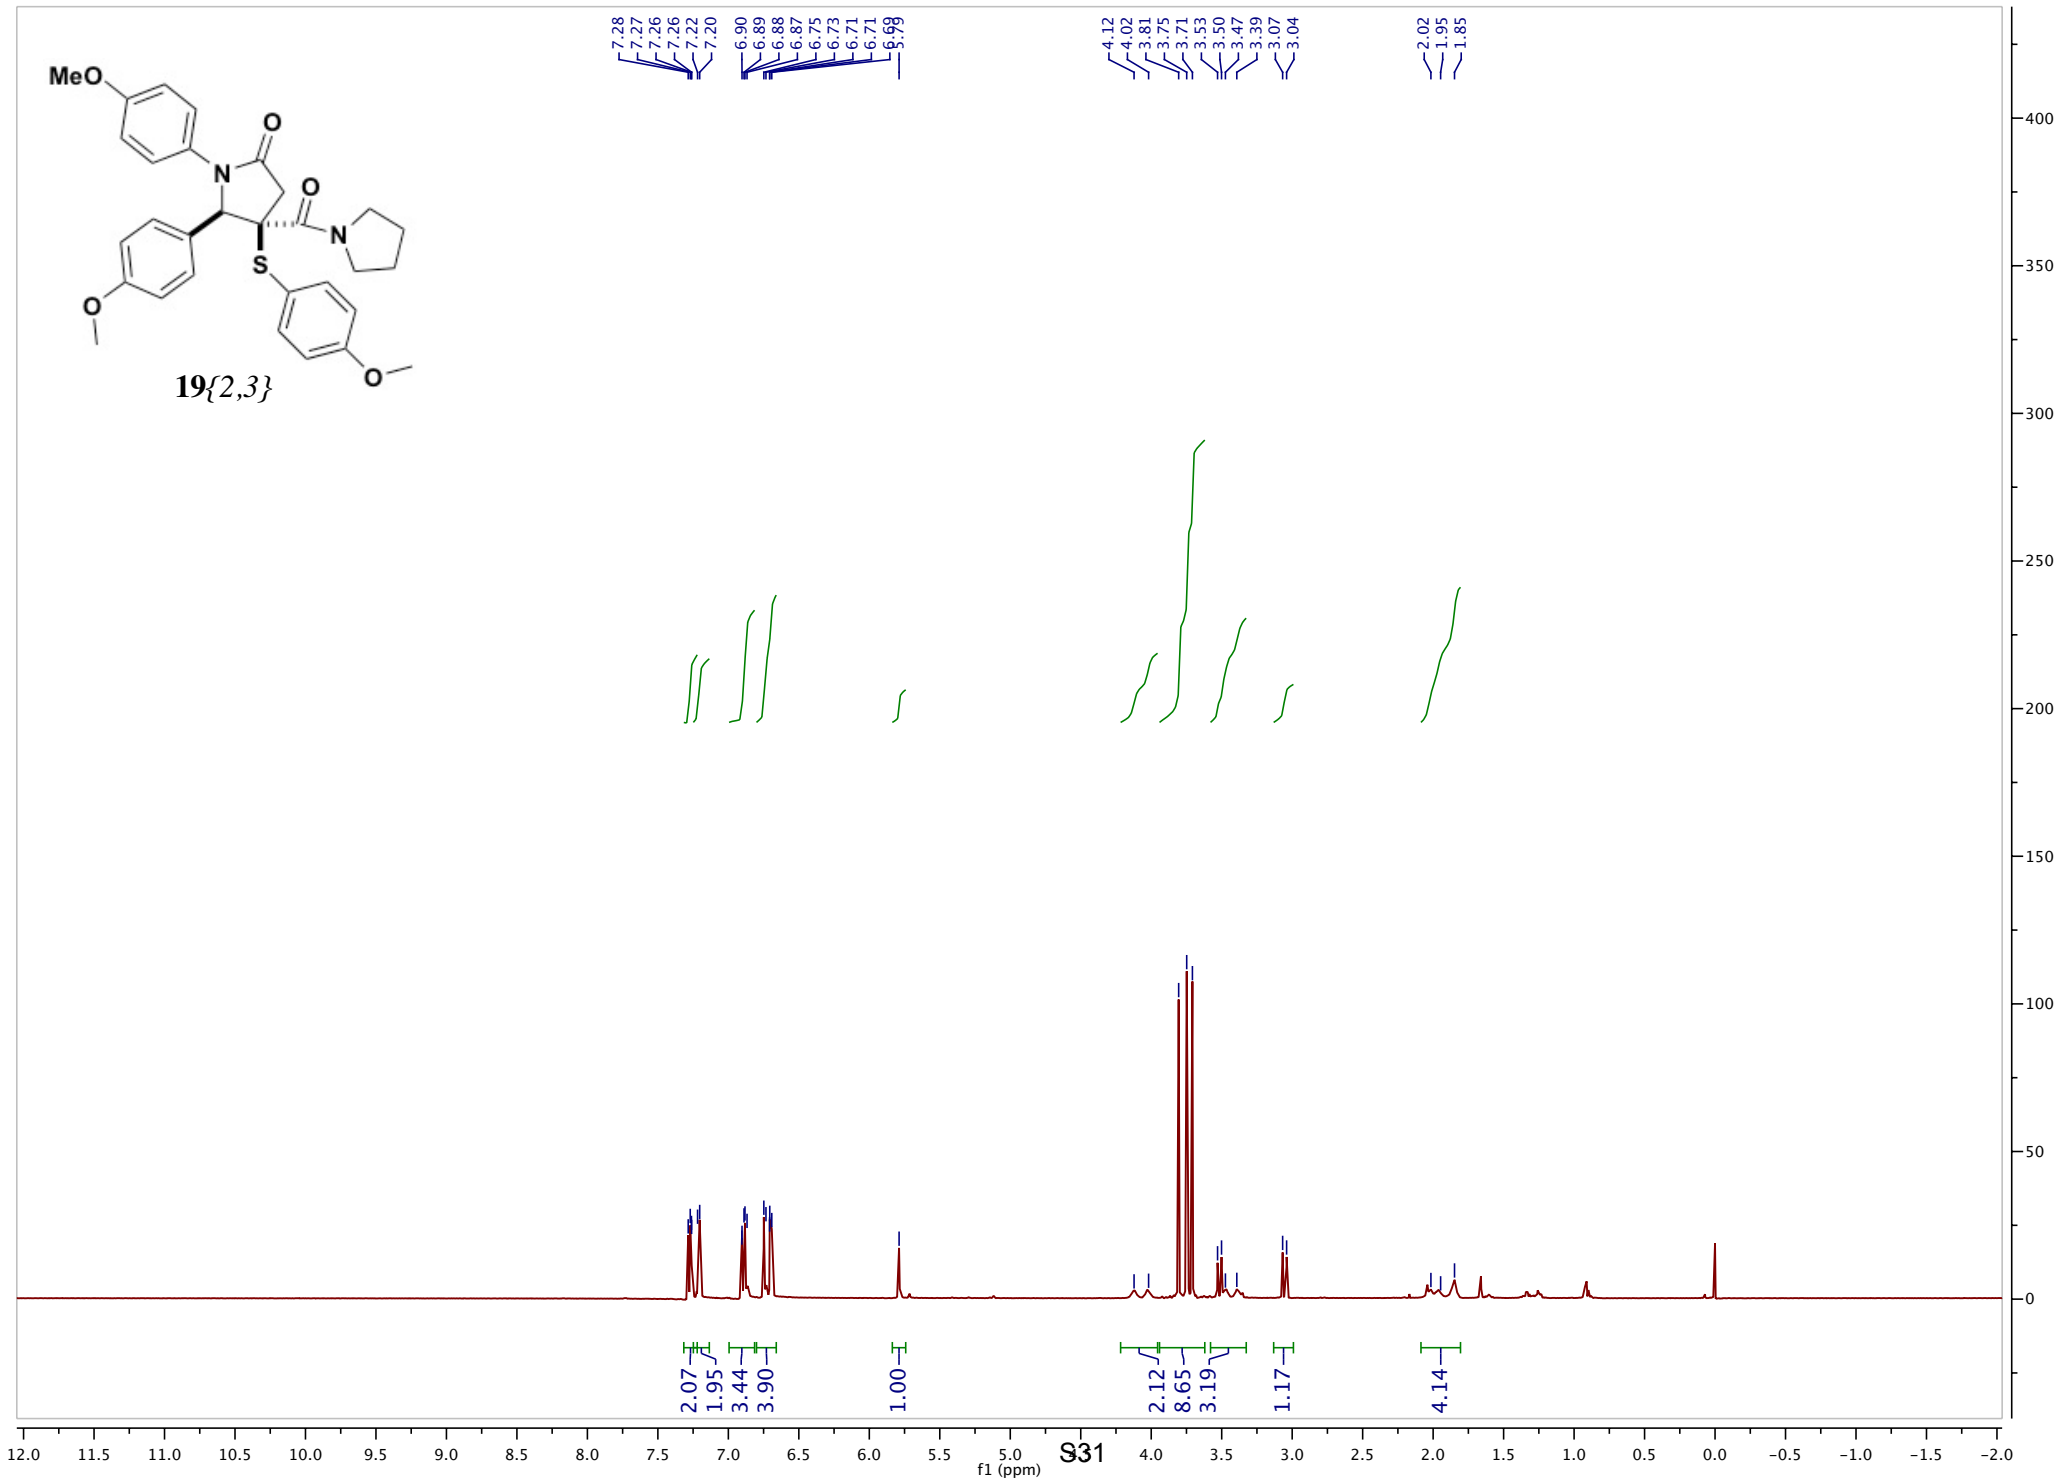

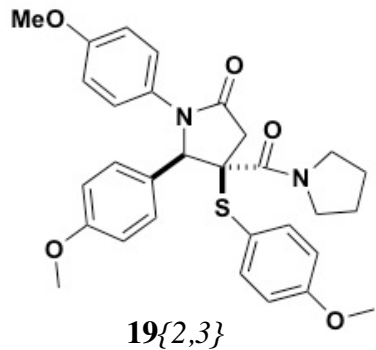

170.83  
167.50  
160.38  
159.73  
157.20

136.08  
130.74  
130.09  
128.14  
124.73  
120.87

114.33  
113.95  
113.78

69.54

59.42  
55.33  
55.25

48.46  
42.46

27.26  
23.30

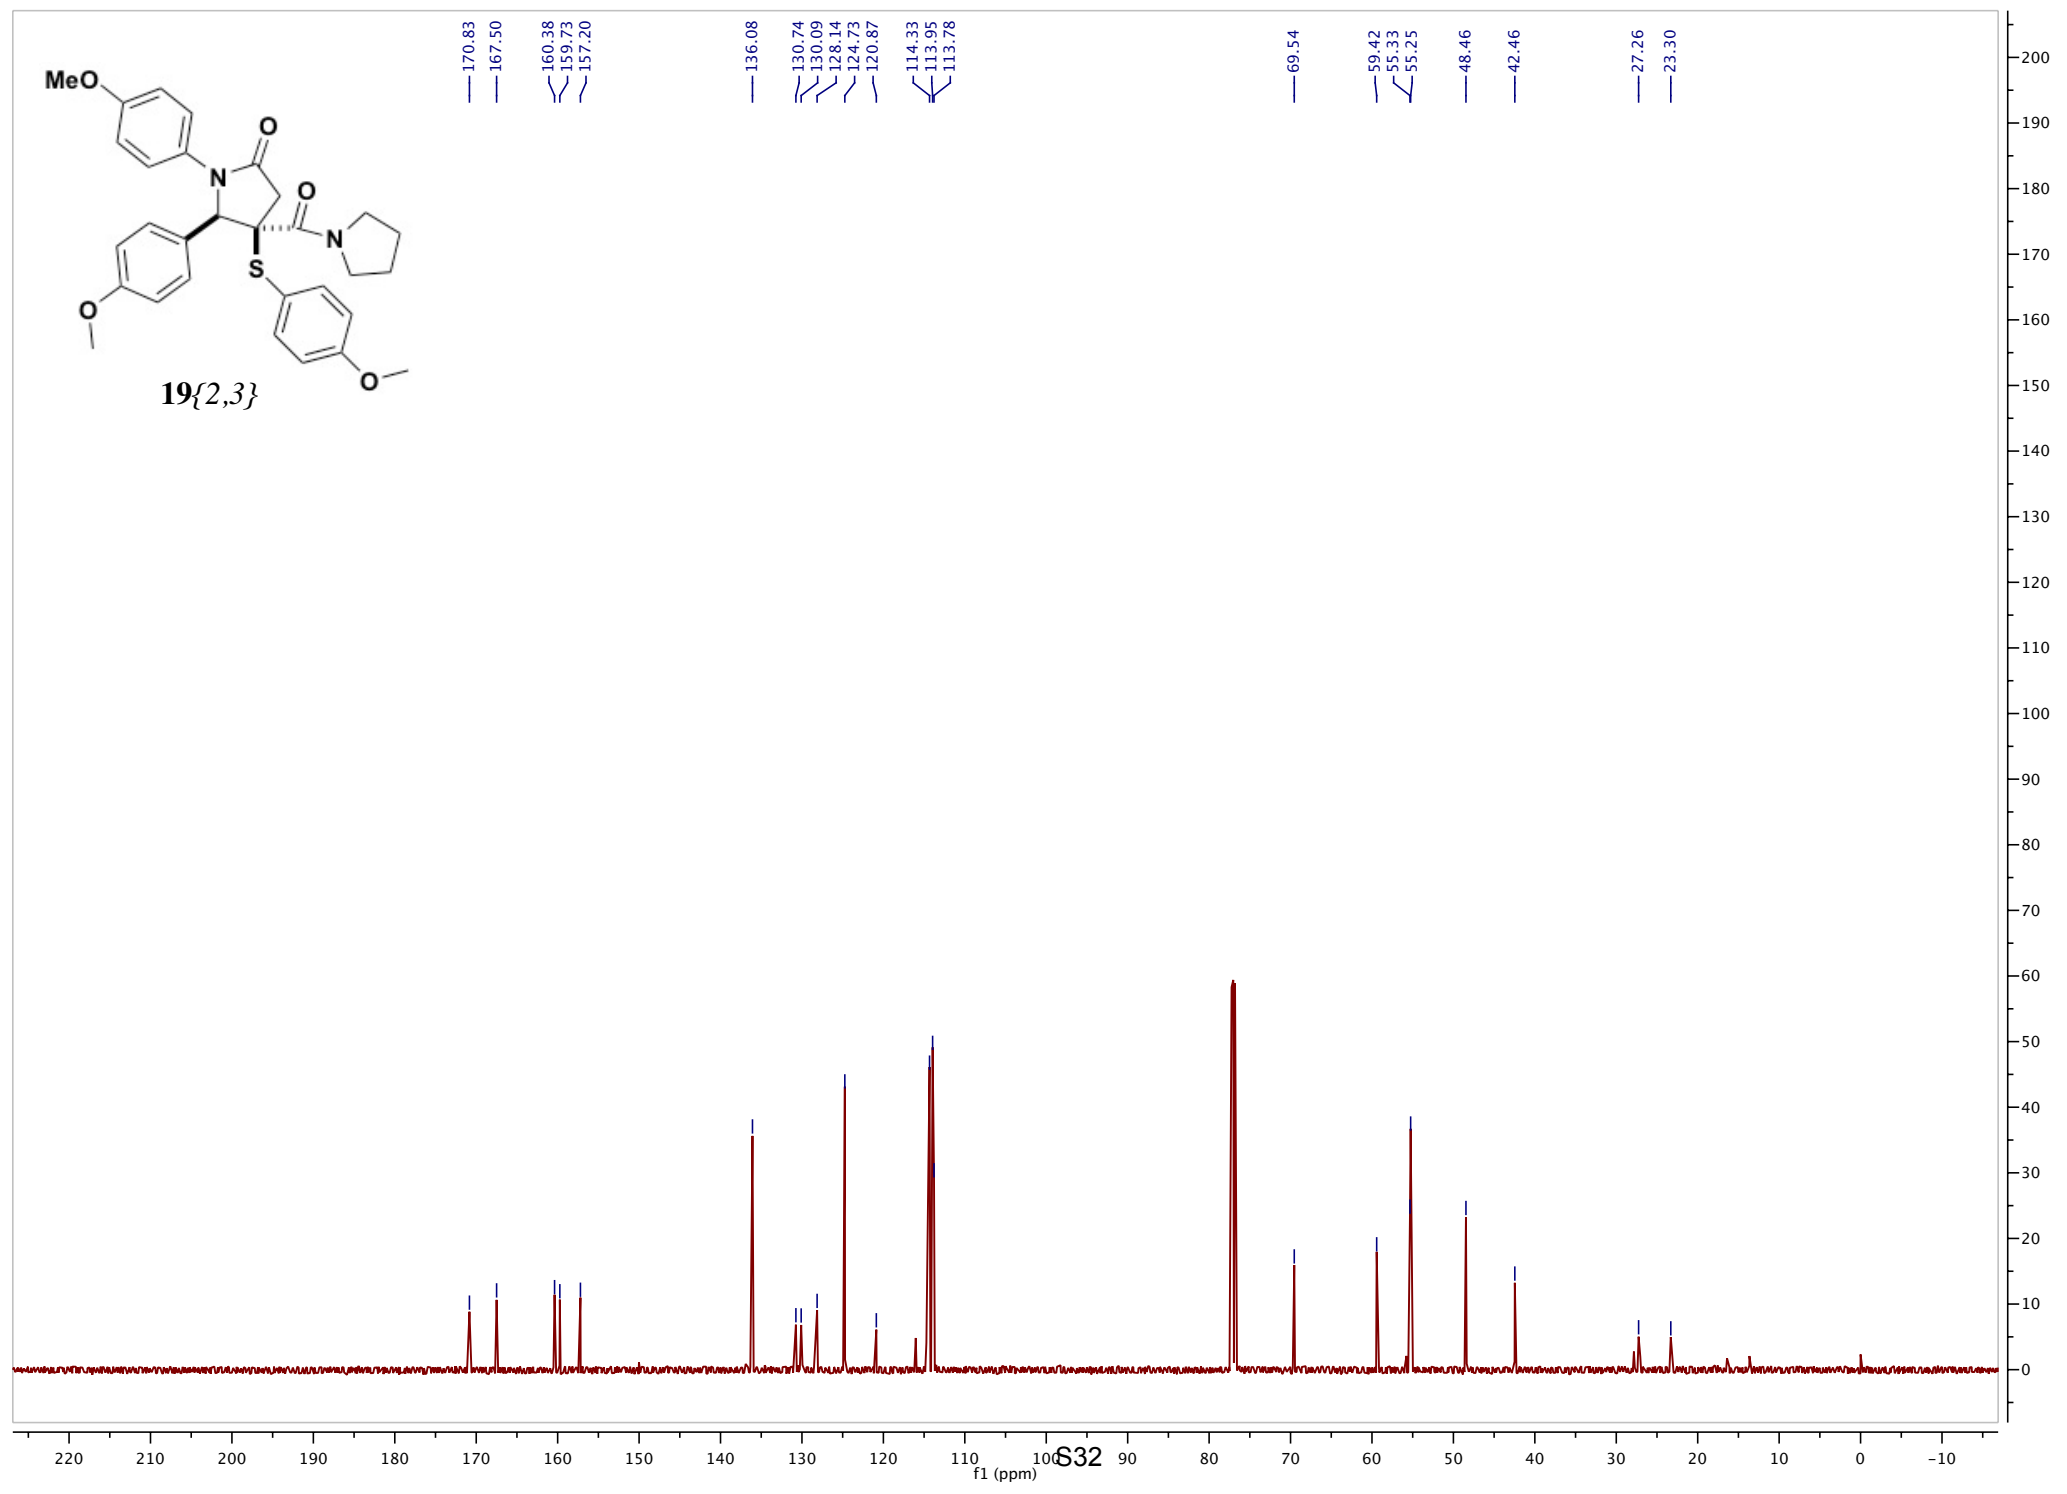



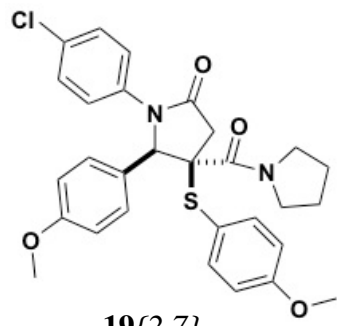

19{2,7}

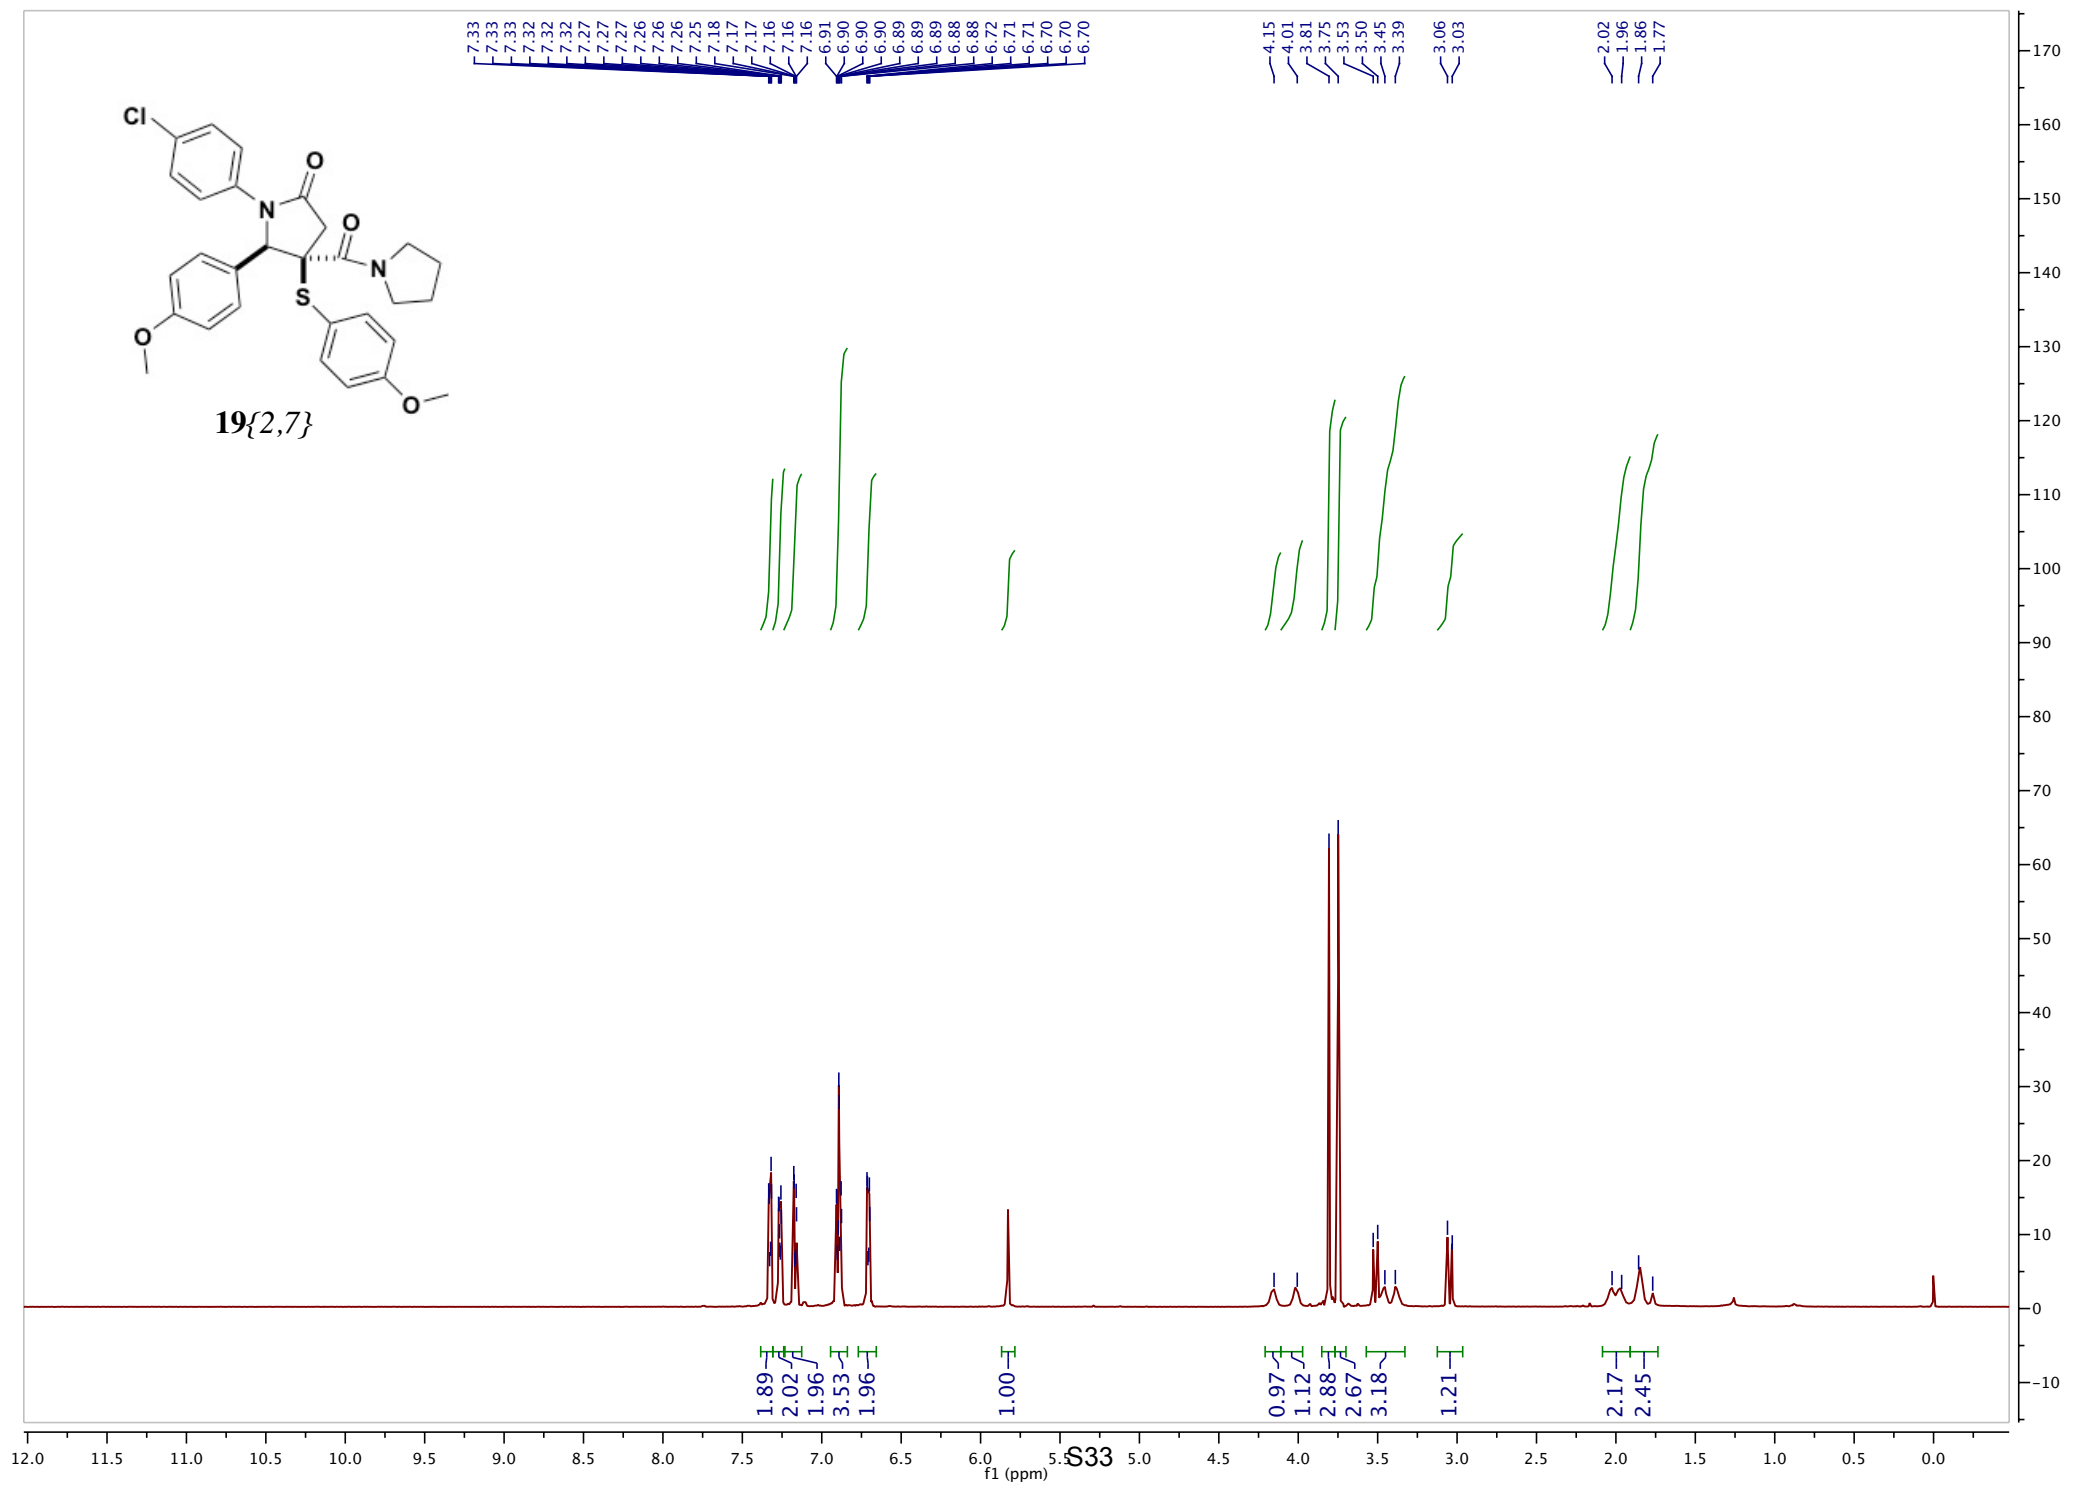

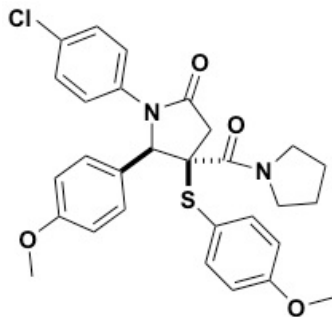

19{2,7}

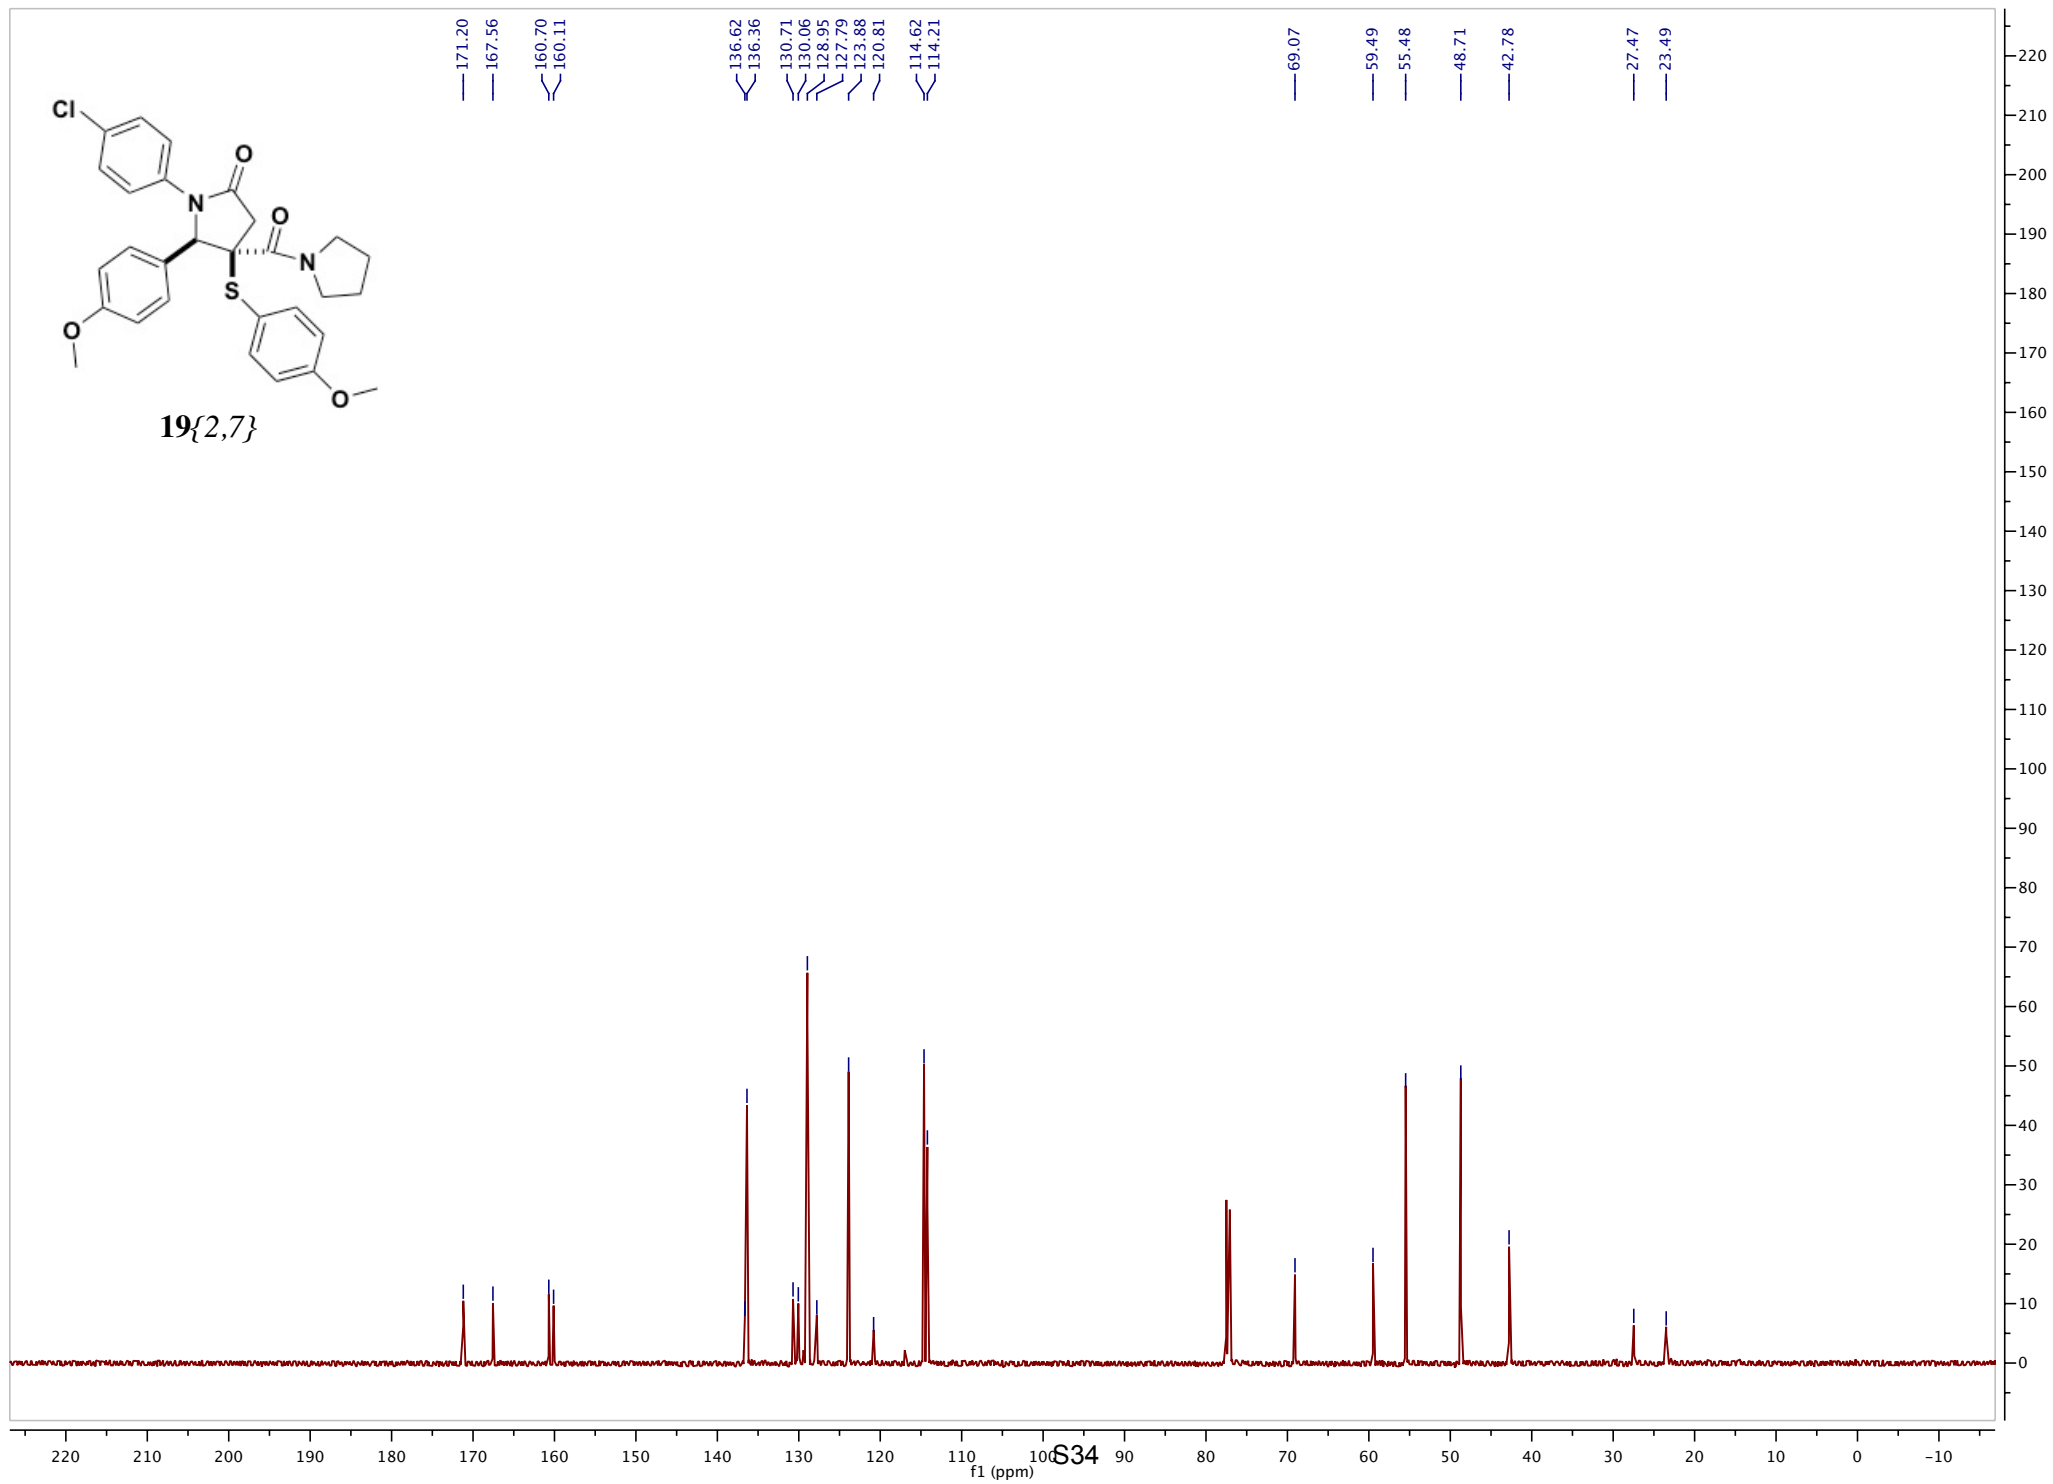

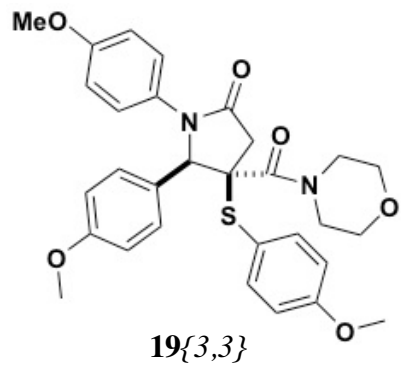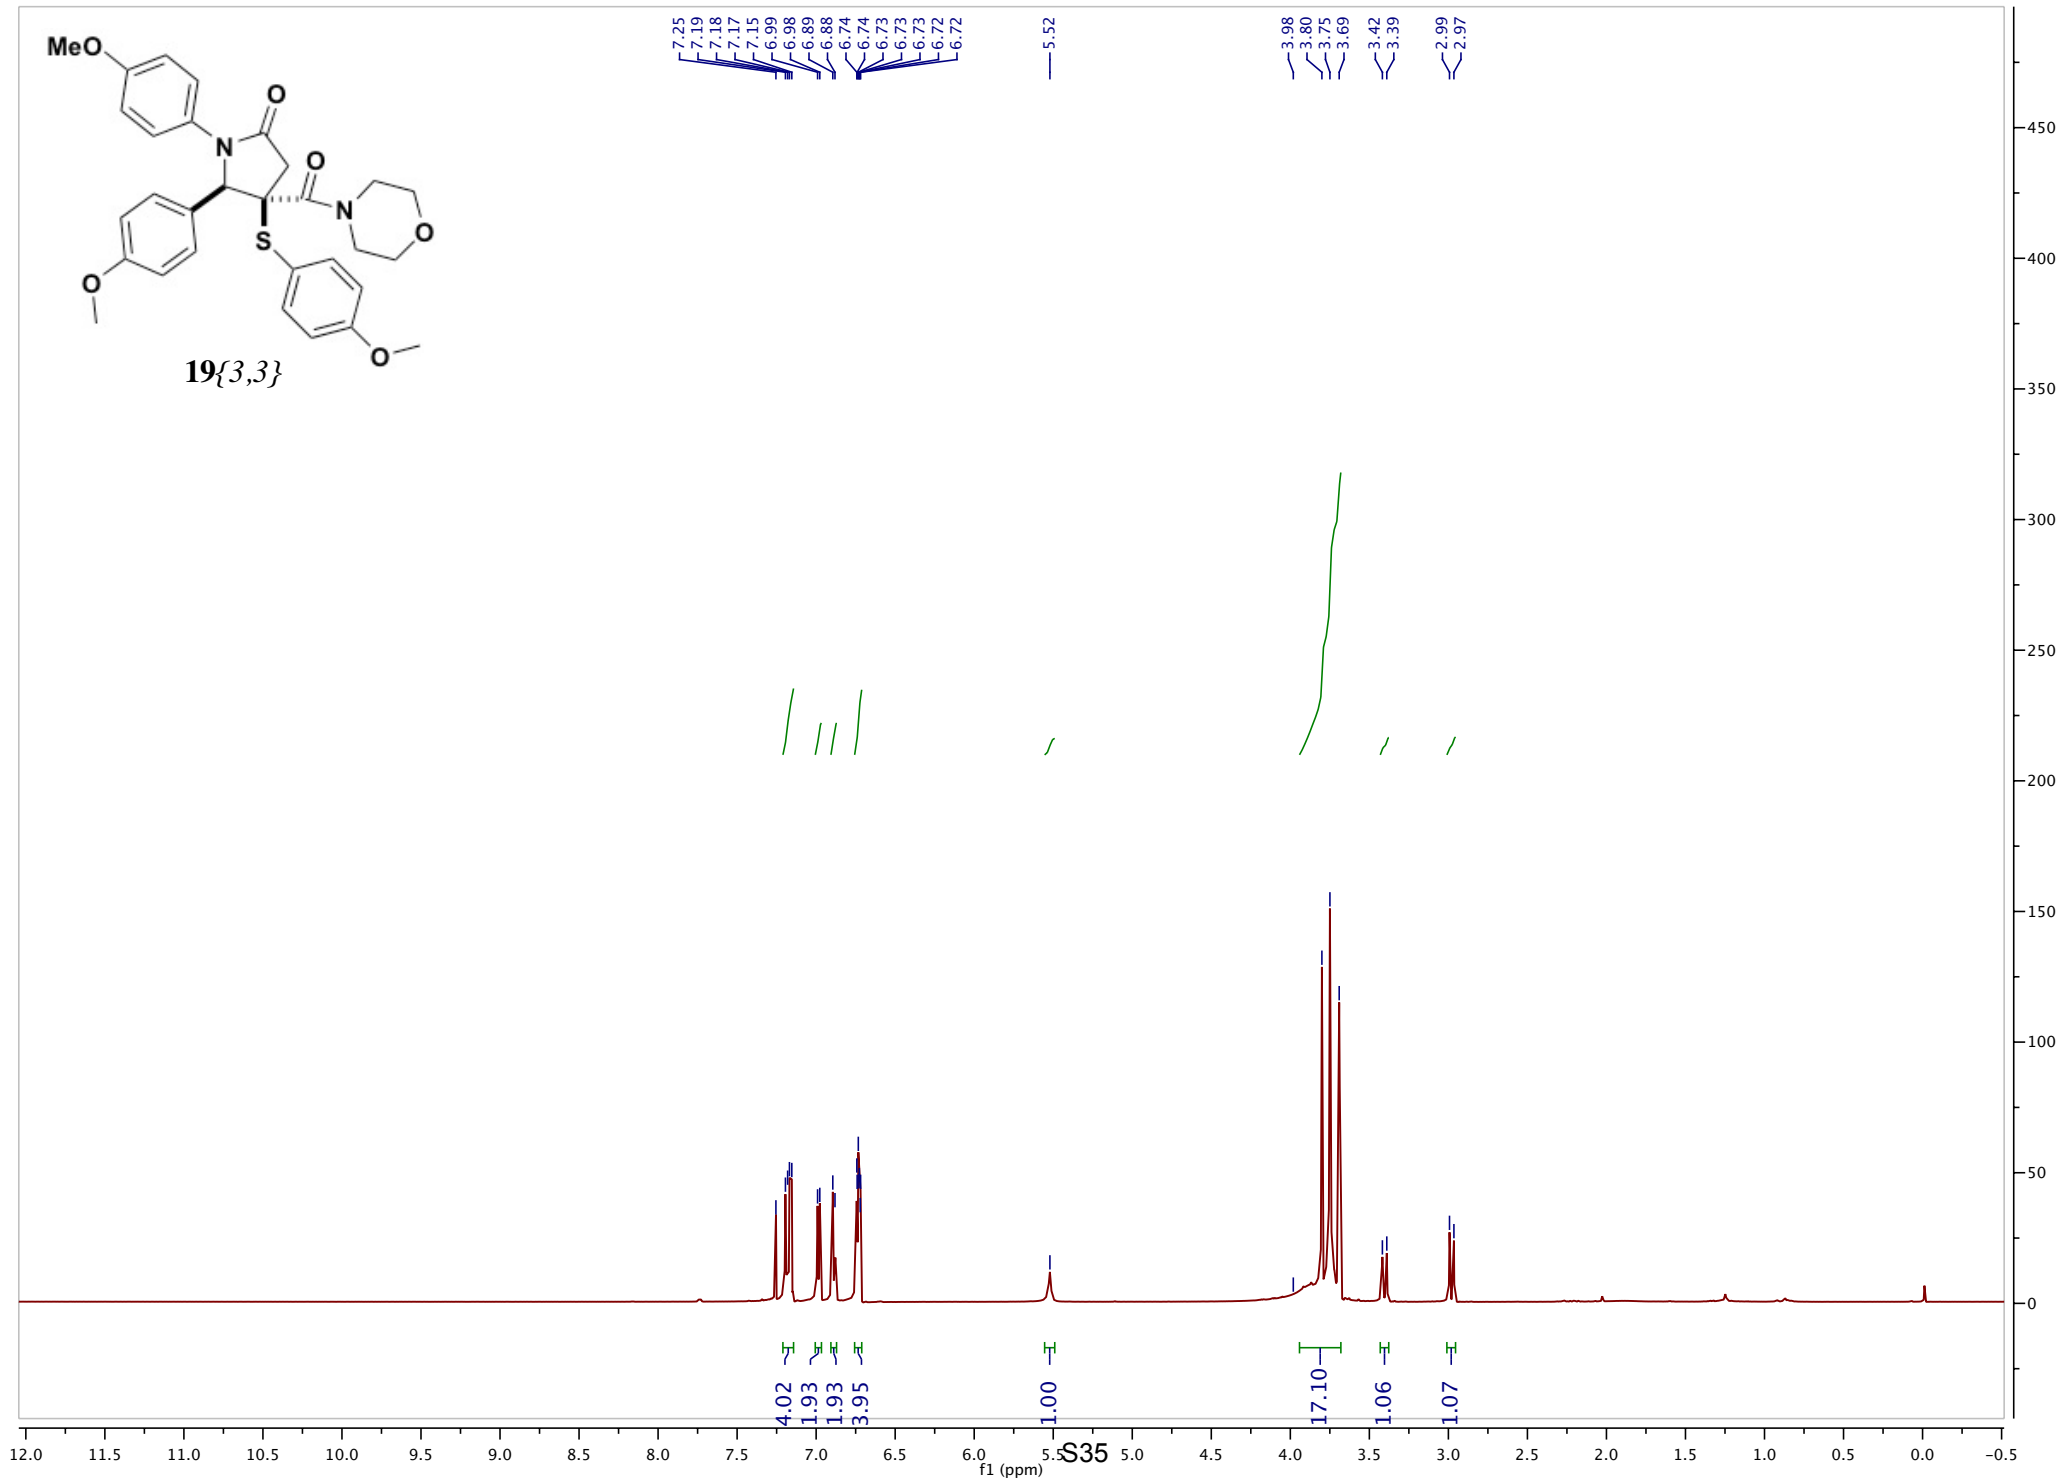

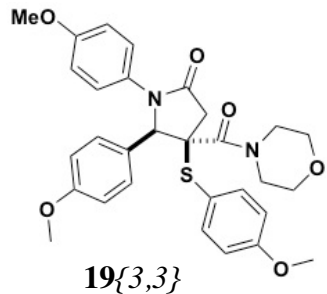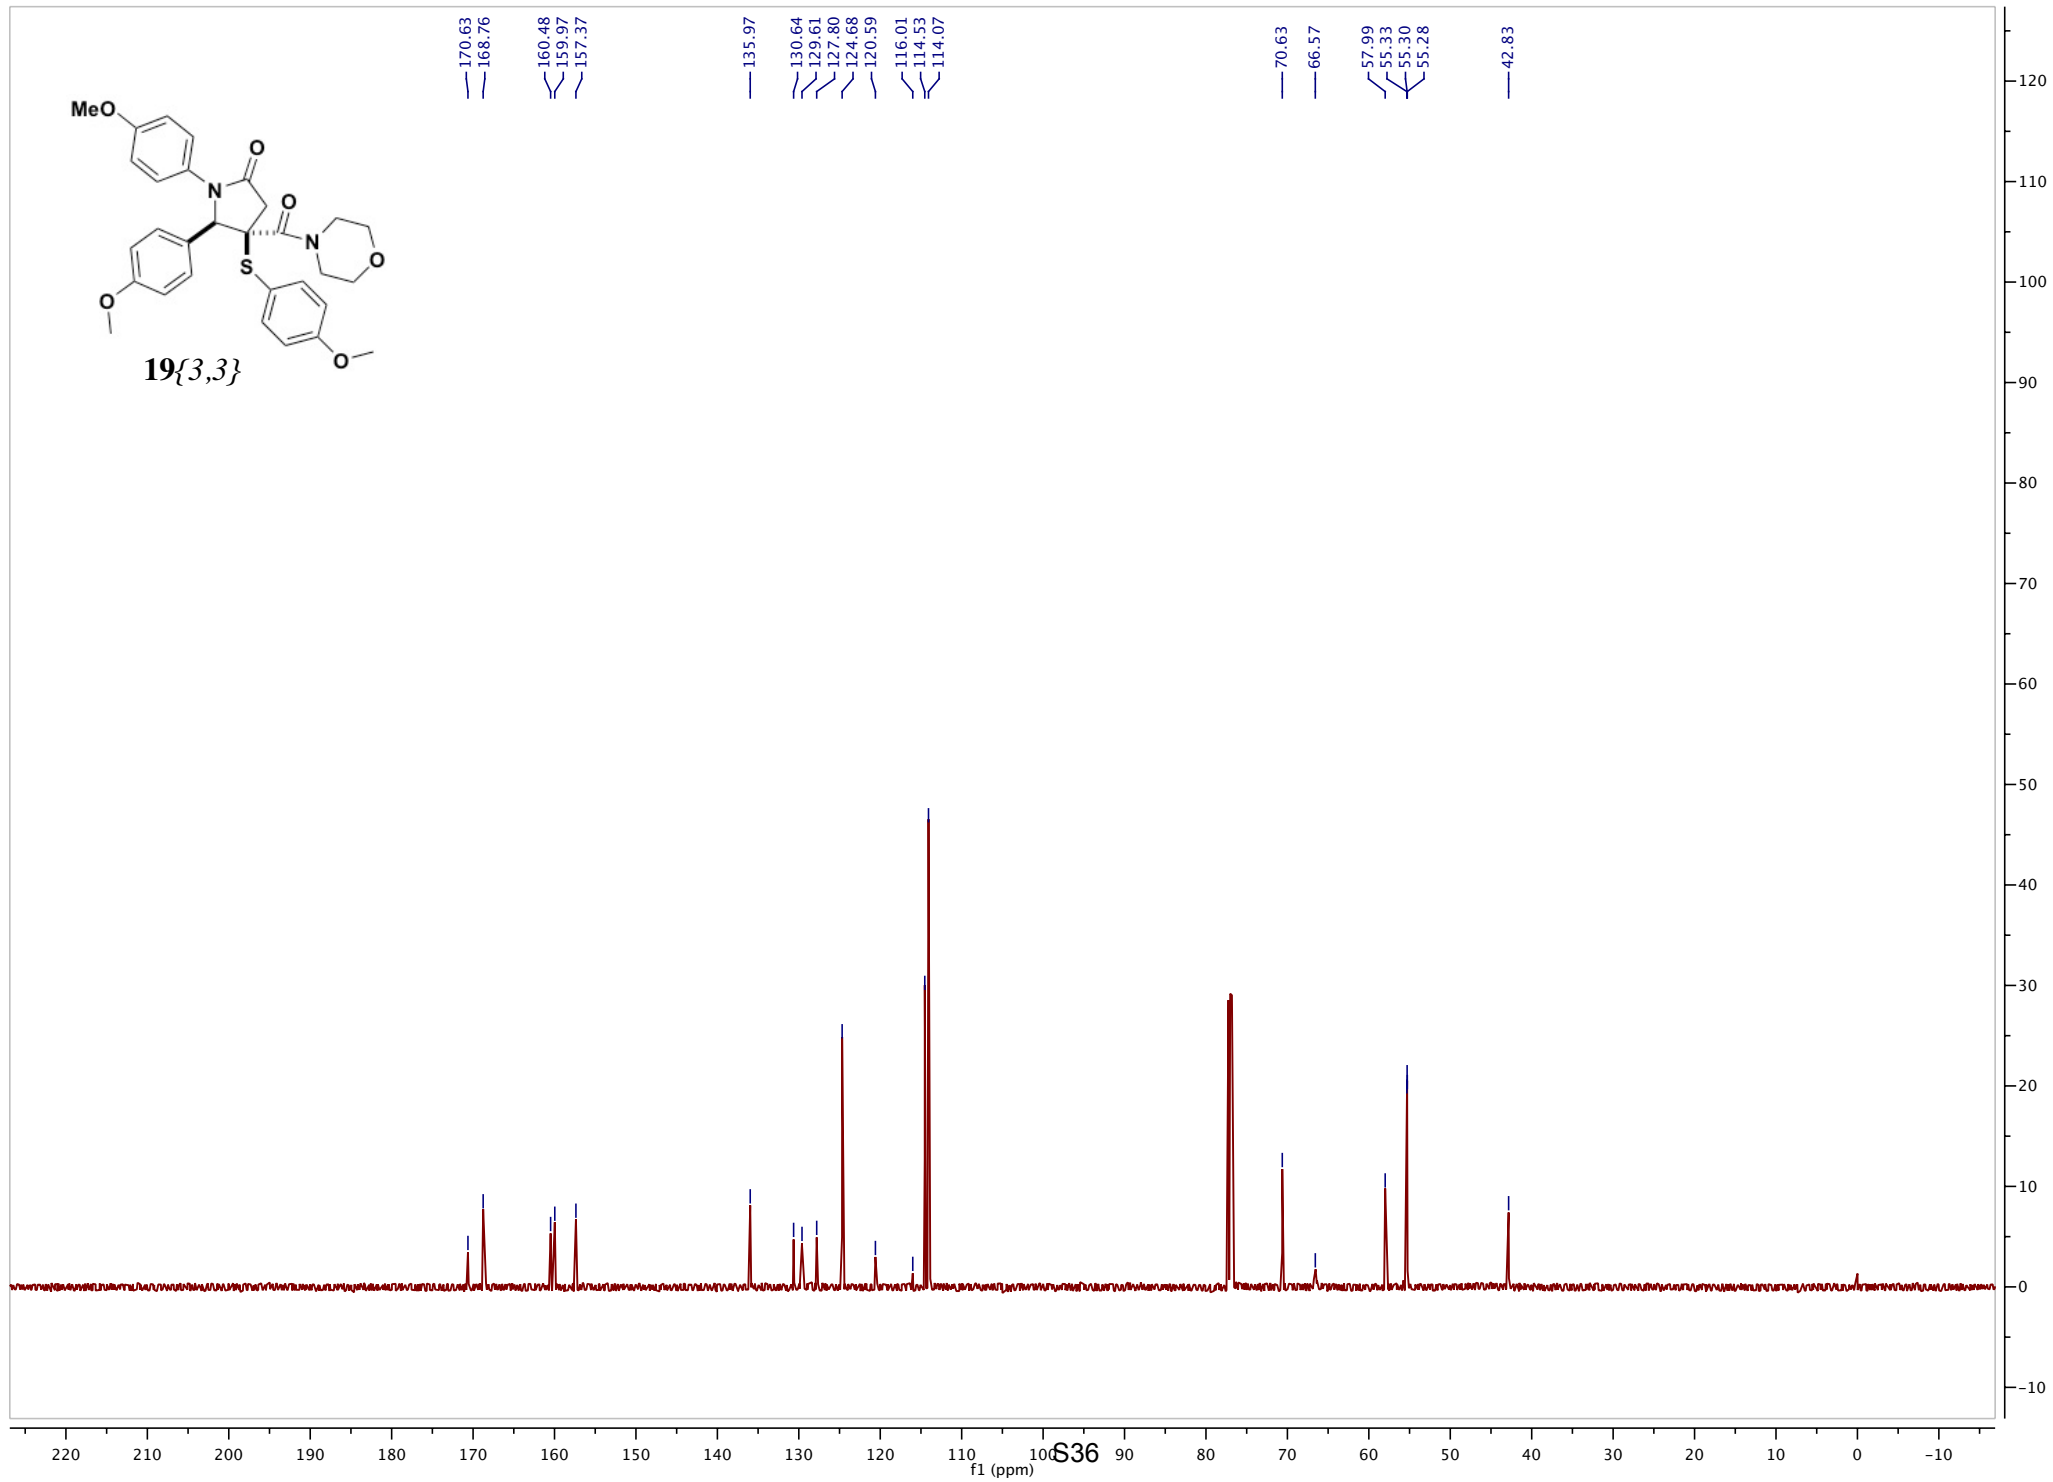

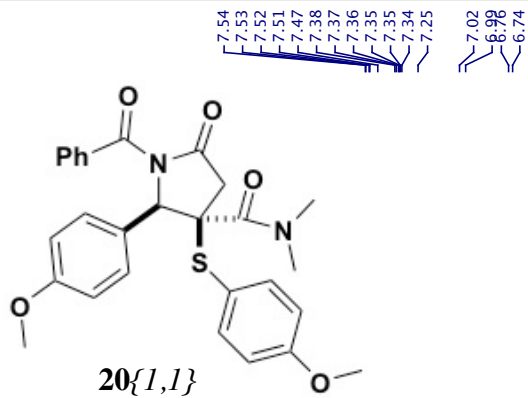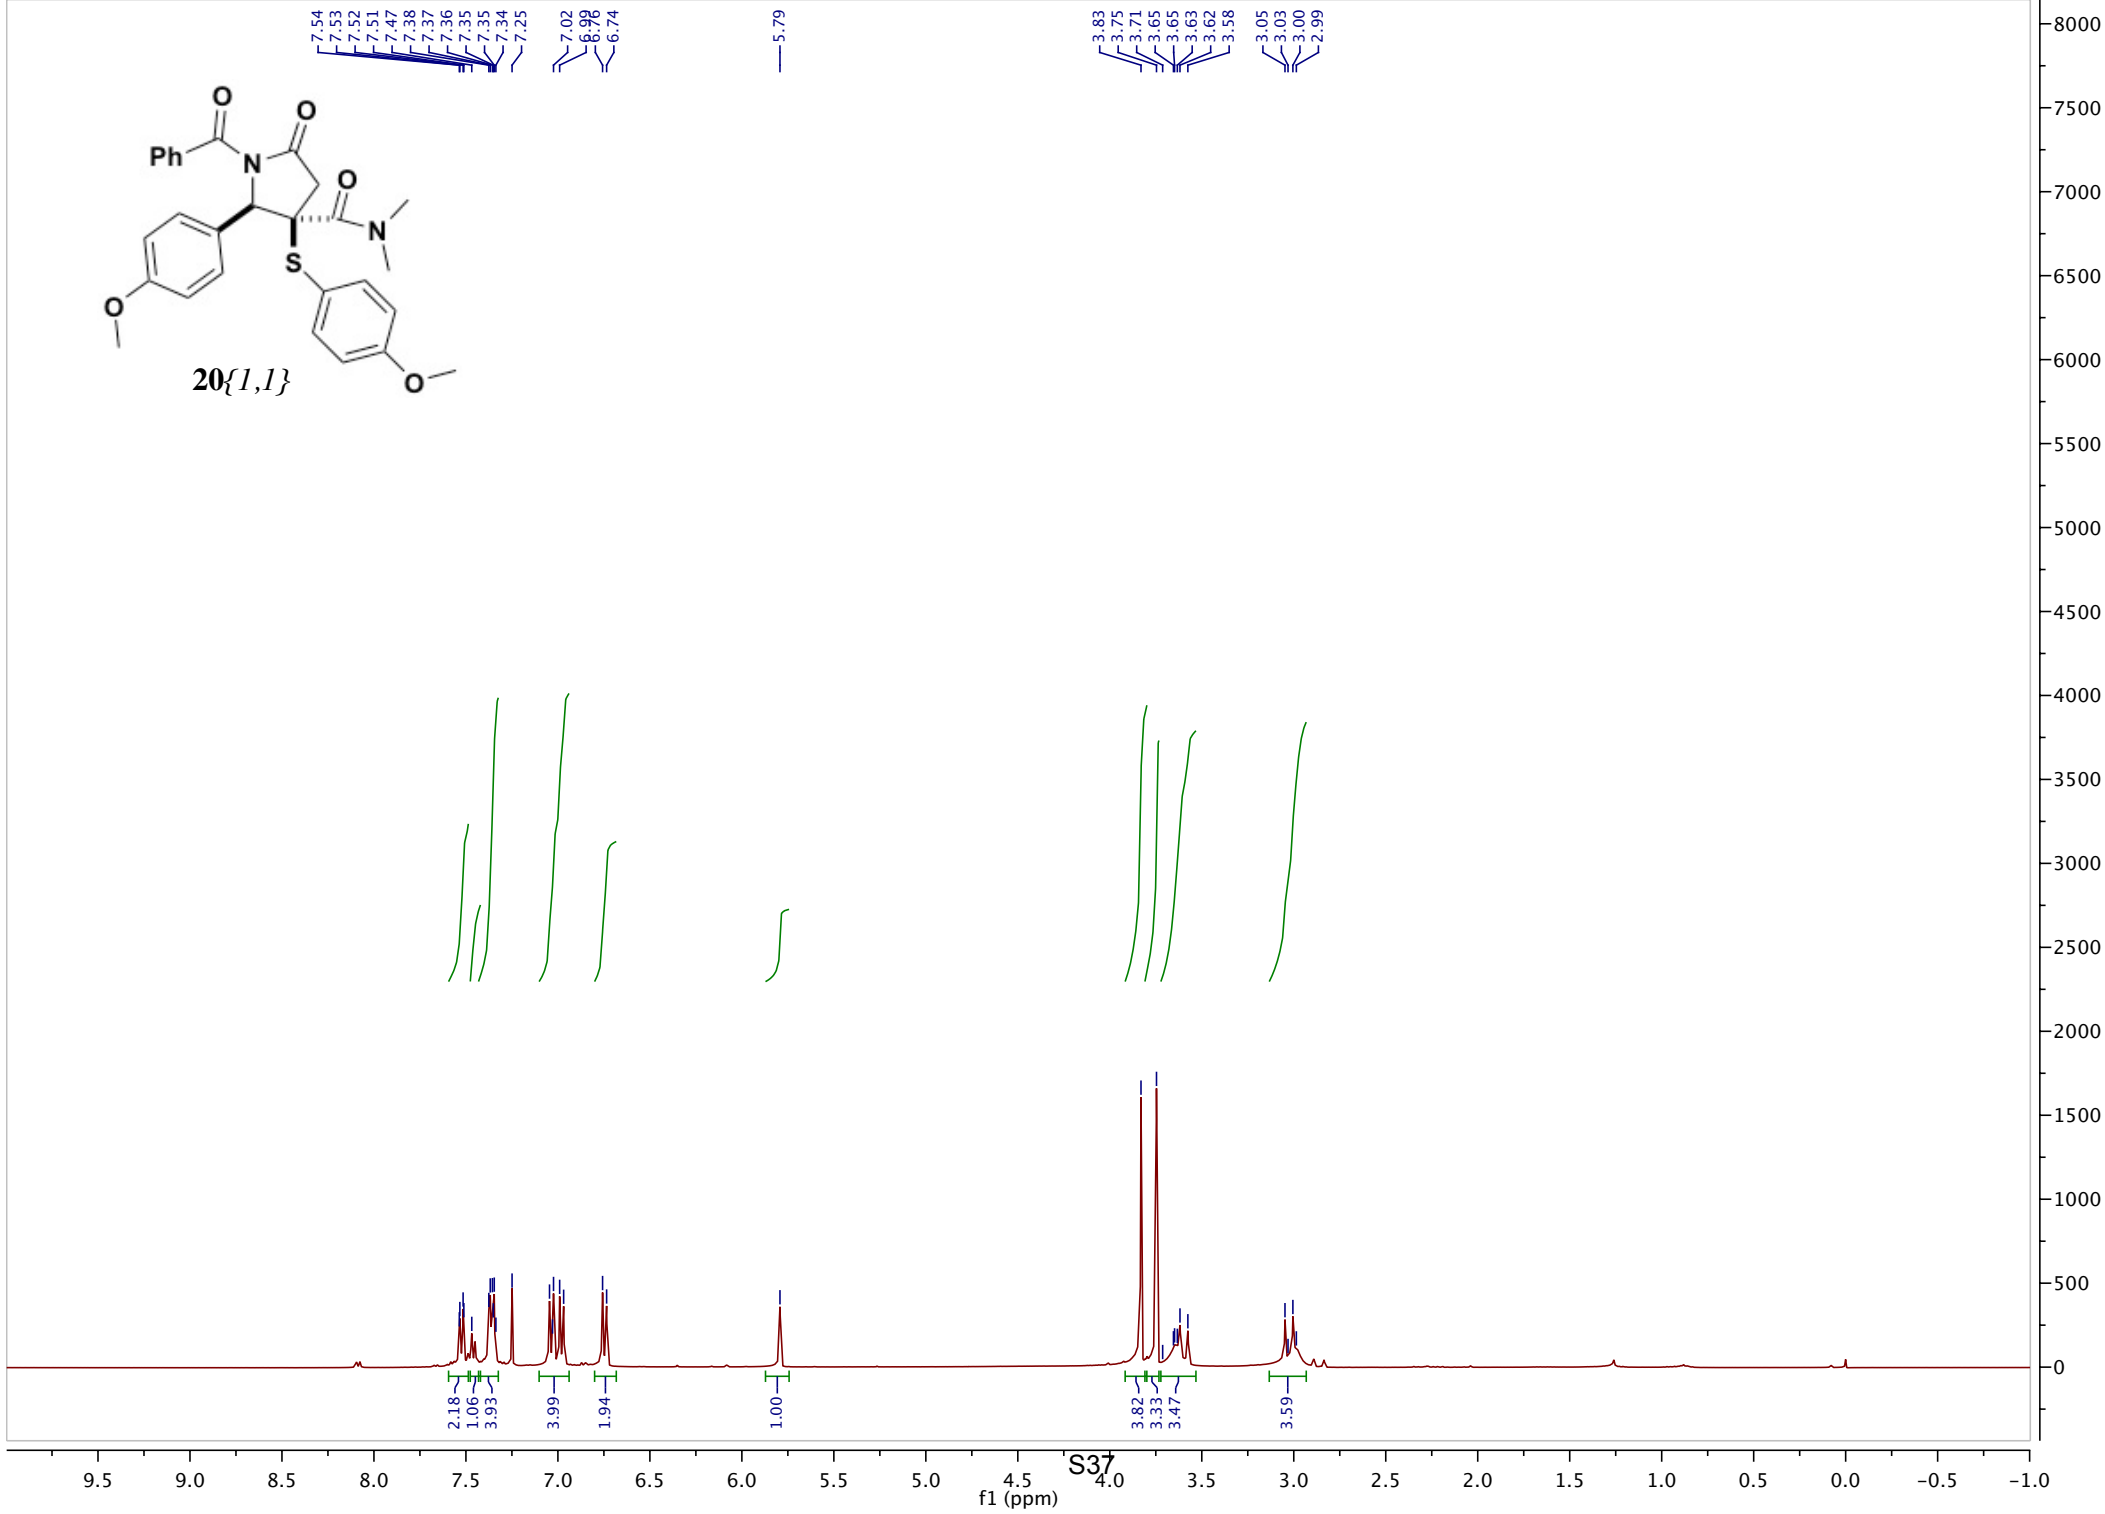

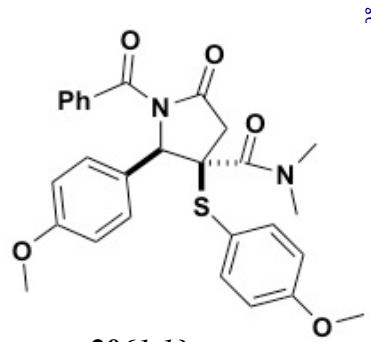

20{1,1}

169.55  
169.38

160.23  
161.10

137.28  
134.23  
133.68  
132.33  
130.31  
129.12  
128.79  
128.09

120.15  
114.91  
114.44

77.65 cdcl3  
77.33 cdcl3  
77.01 cdcl3

66.12

57.84  
55.57  
55.52

45.16

40.12  
38.31

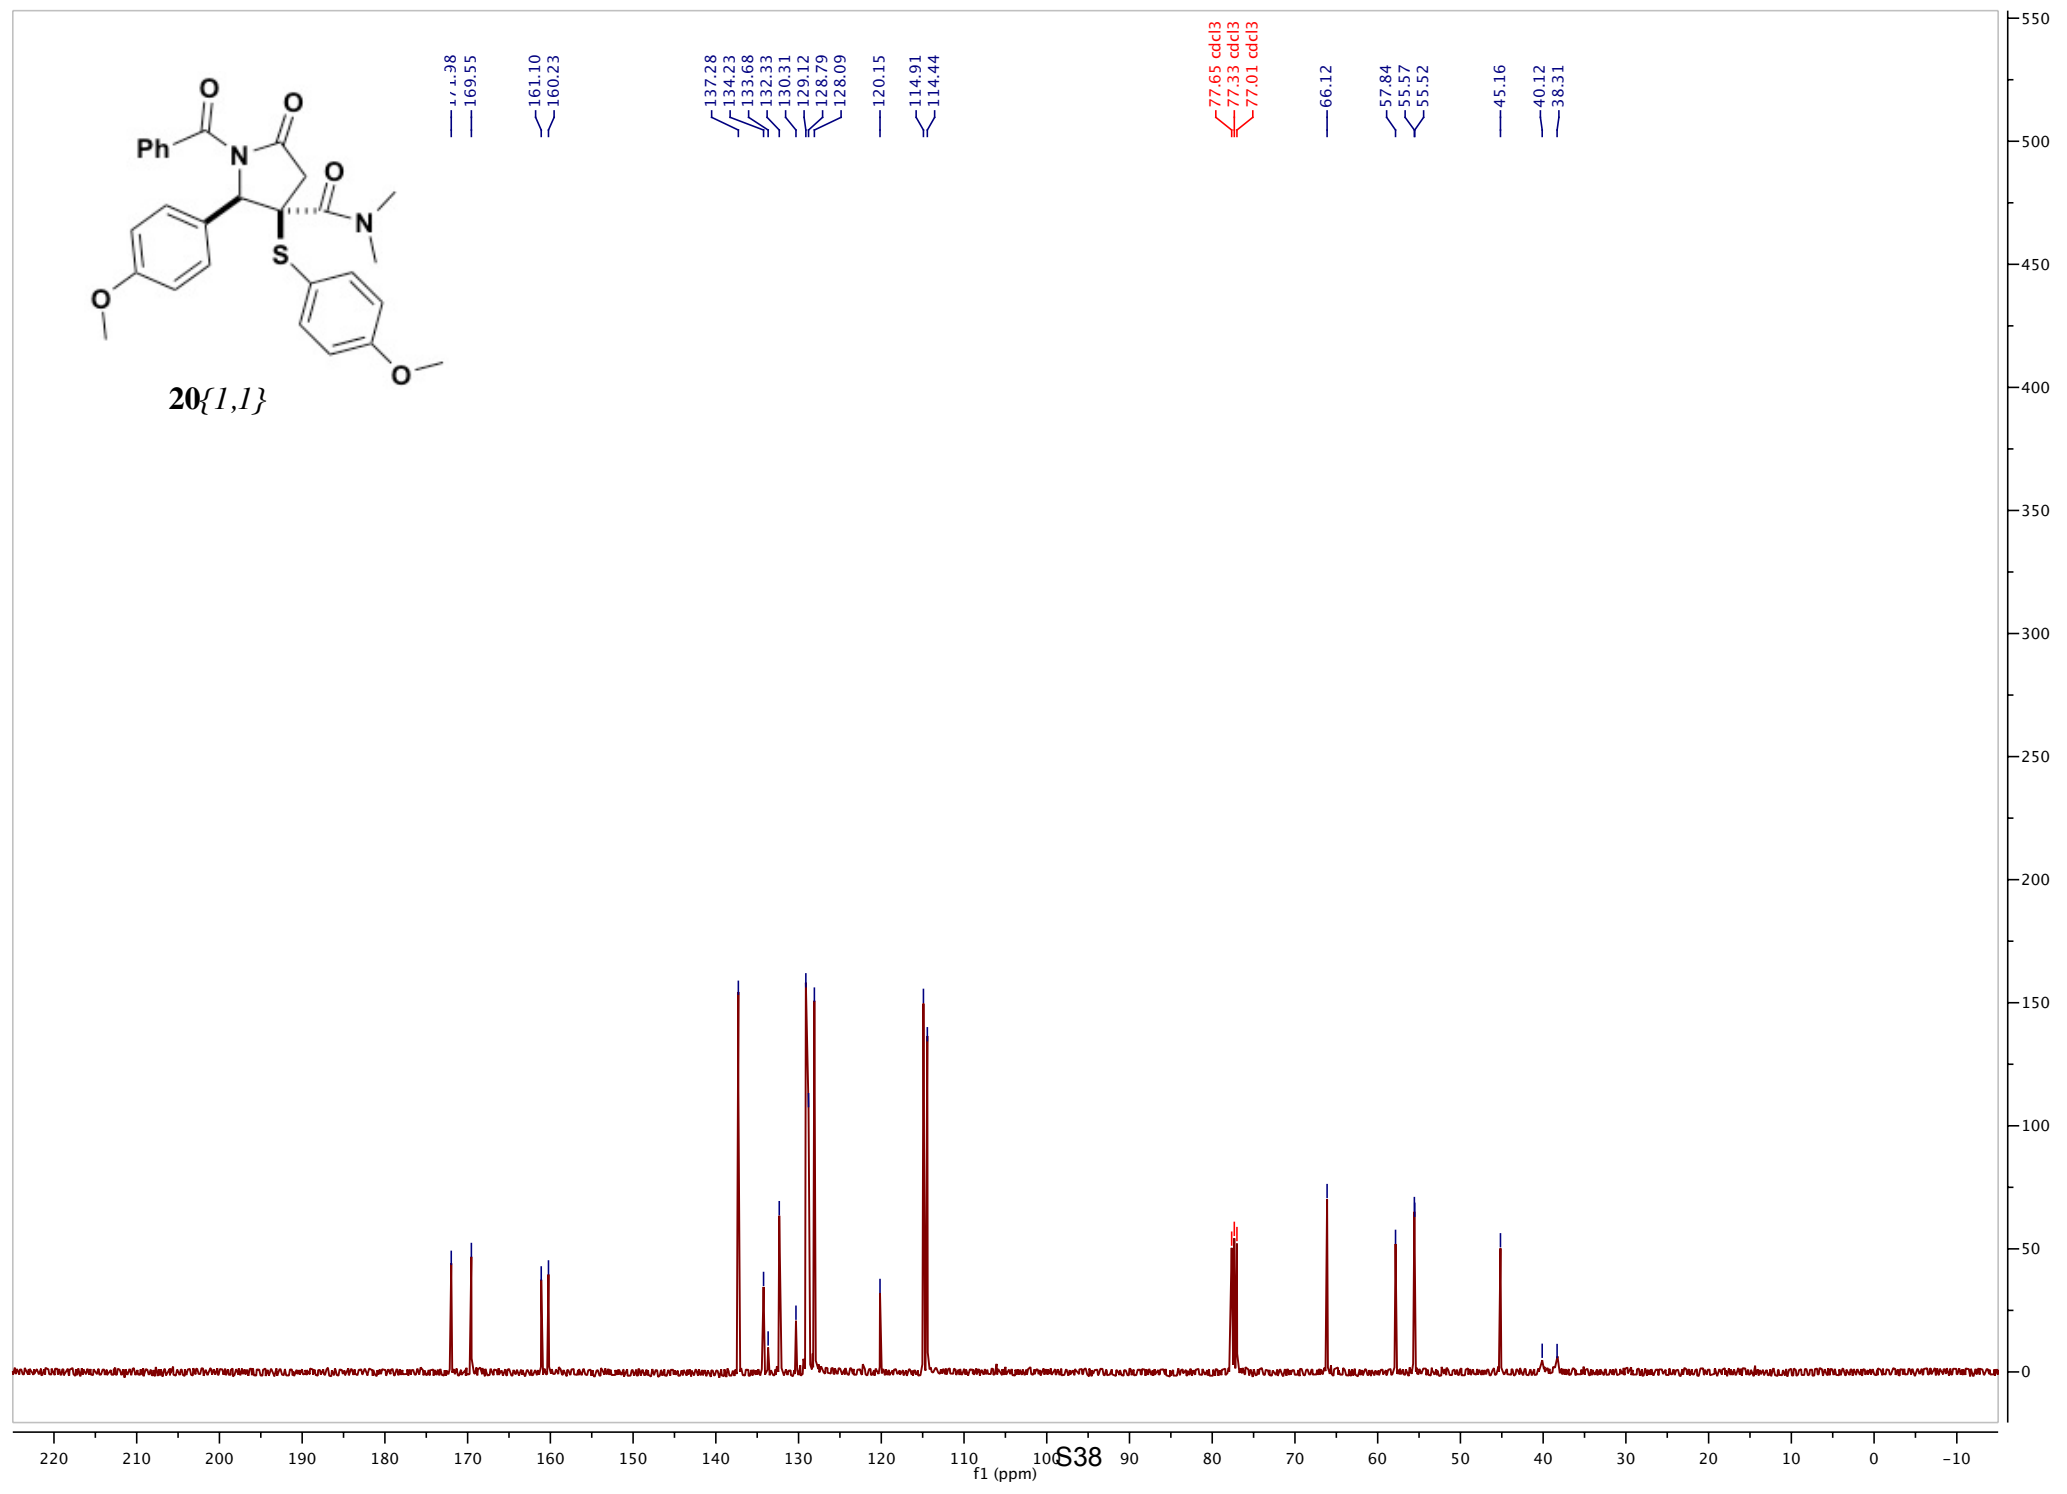

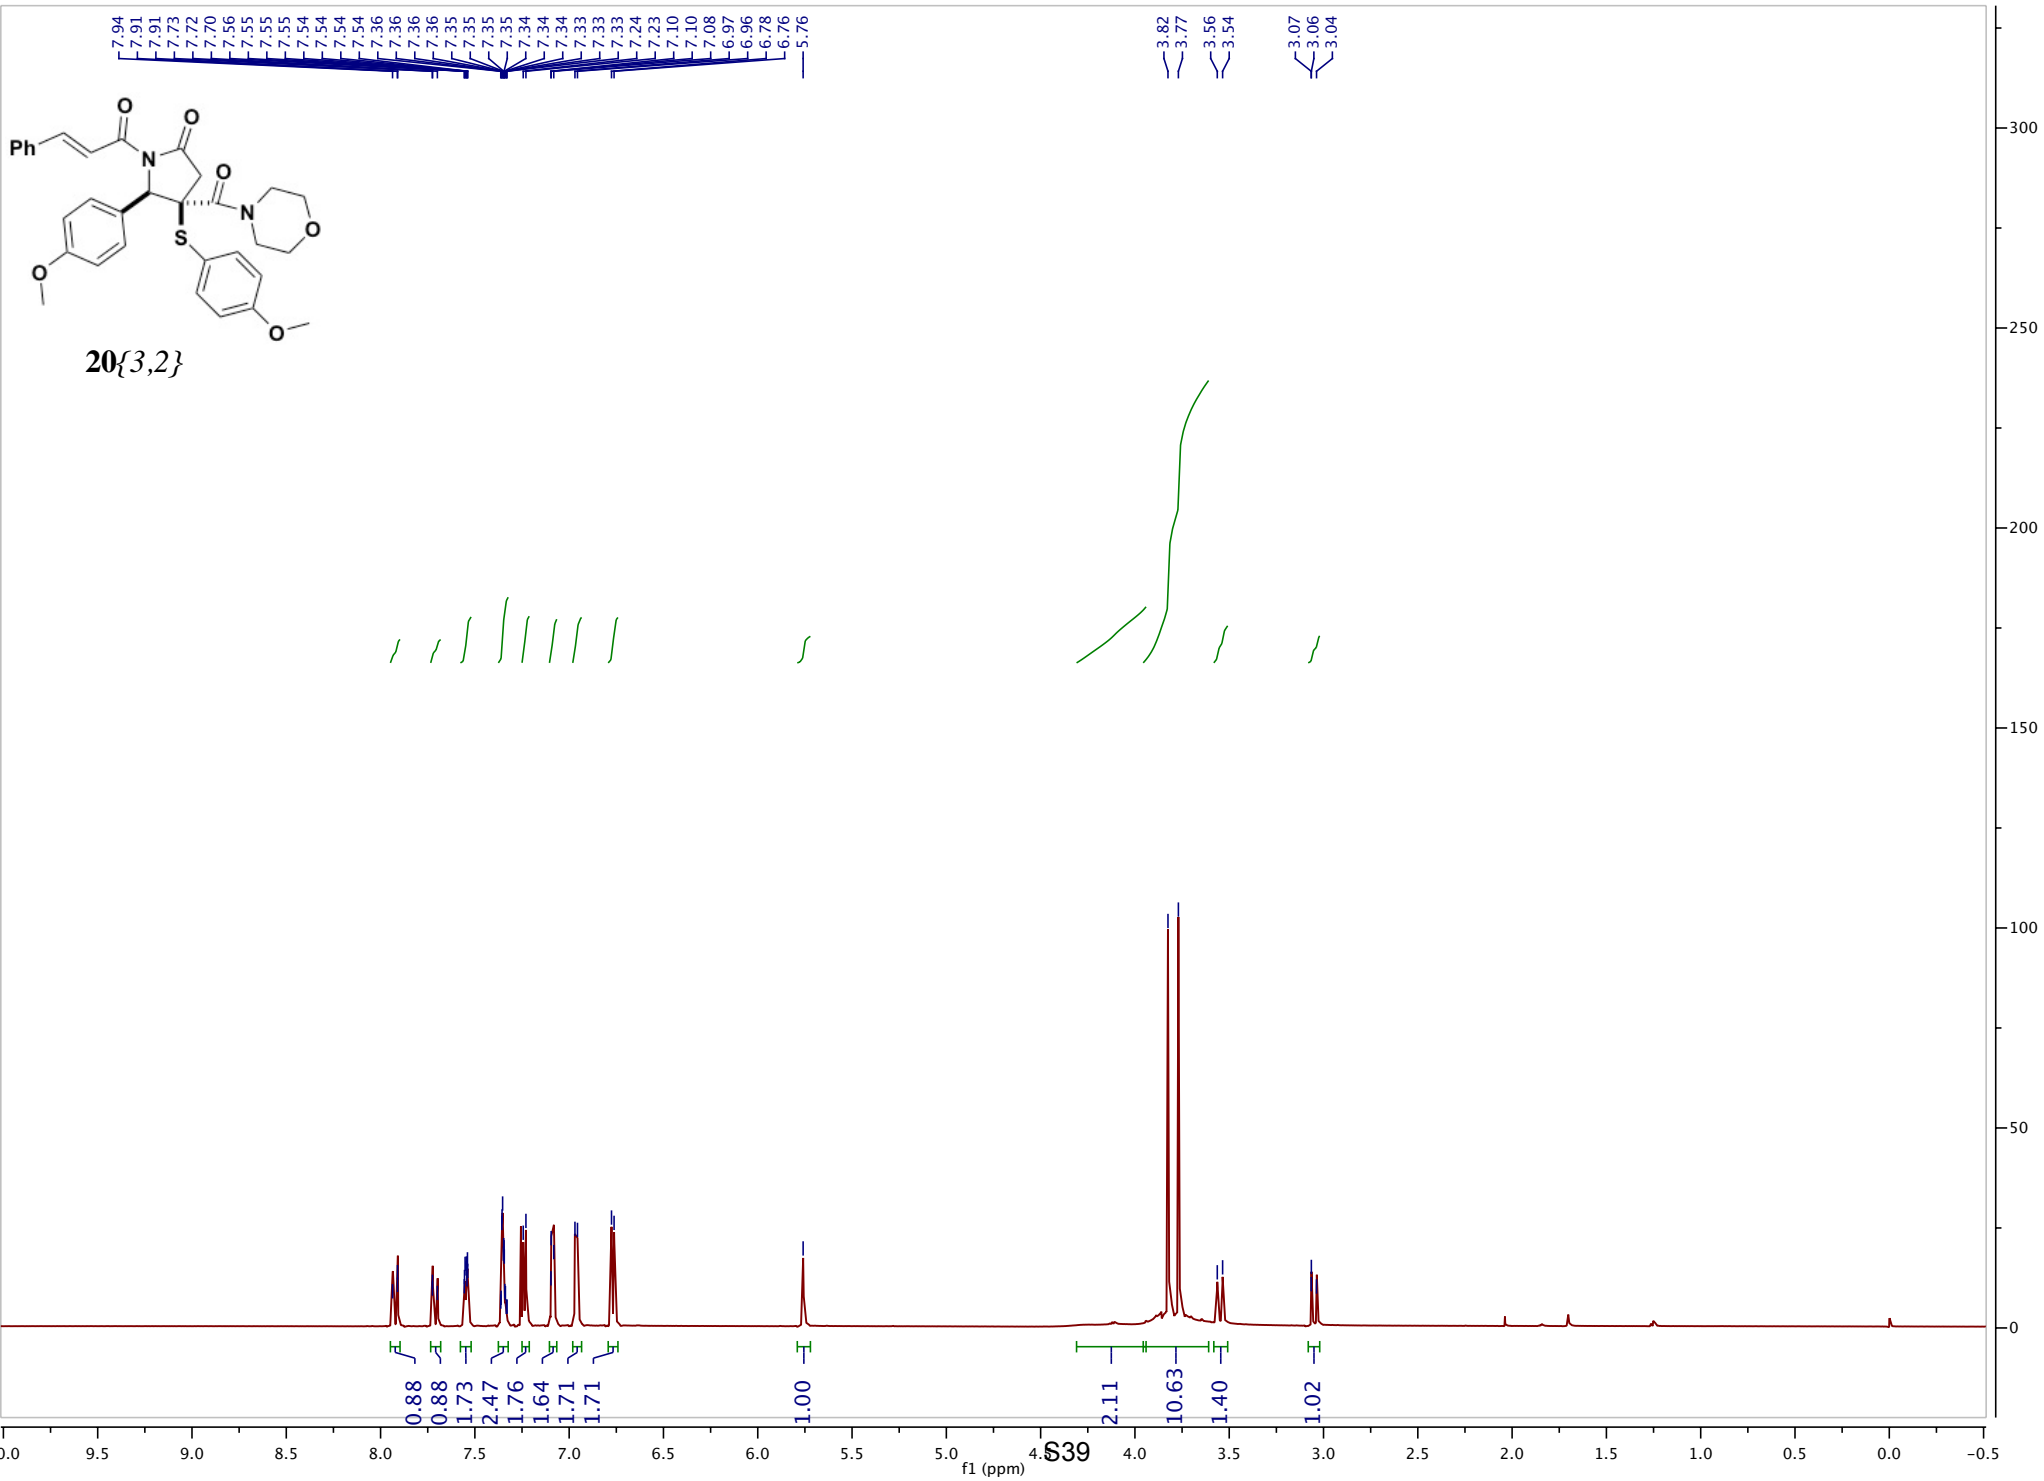

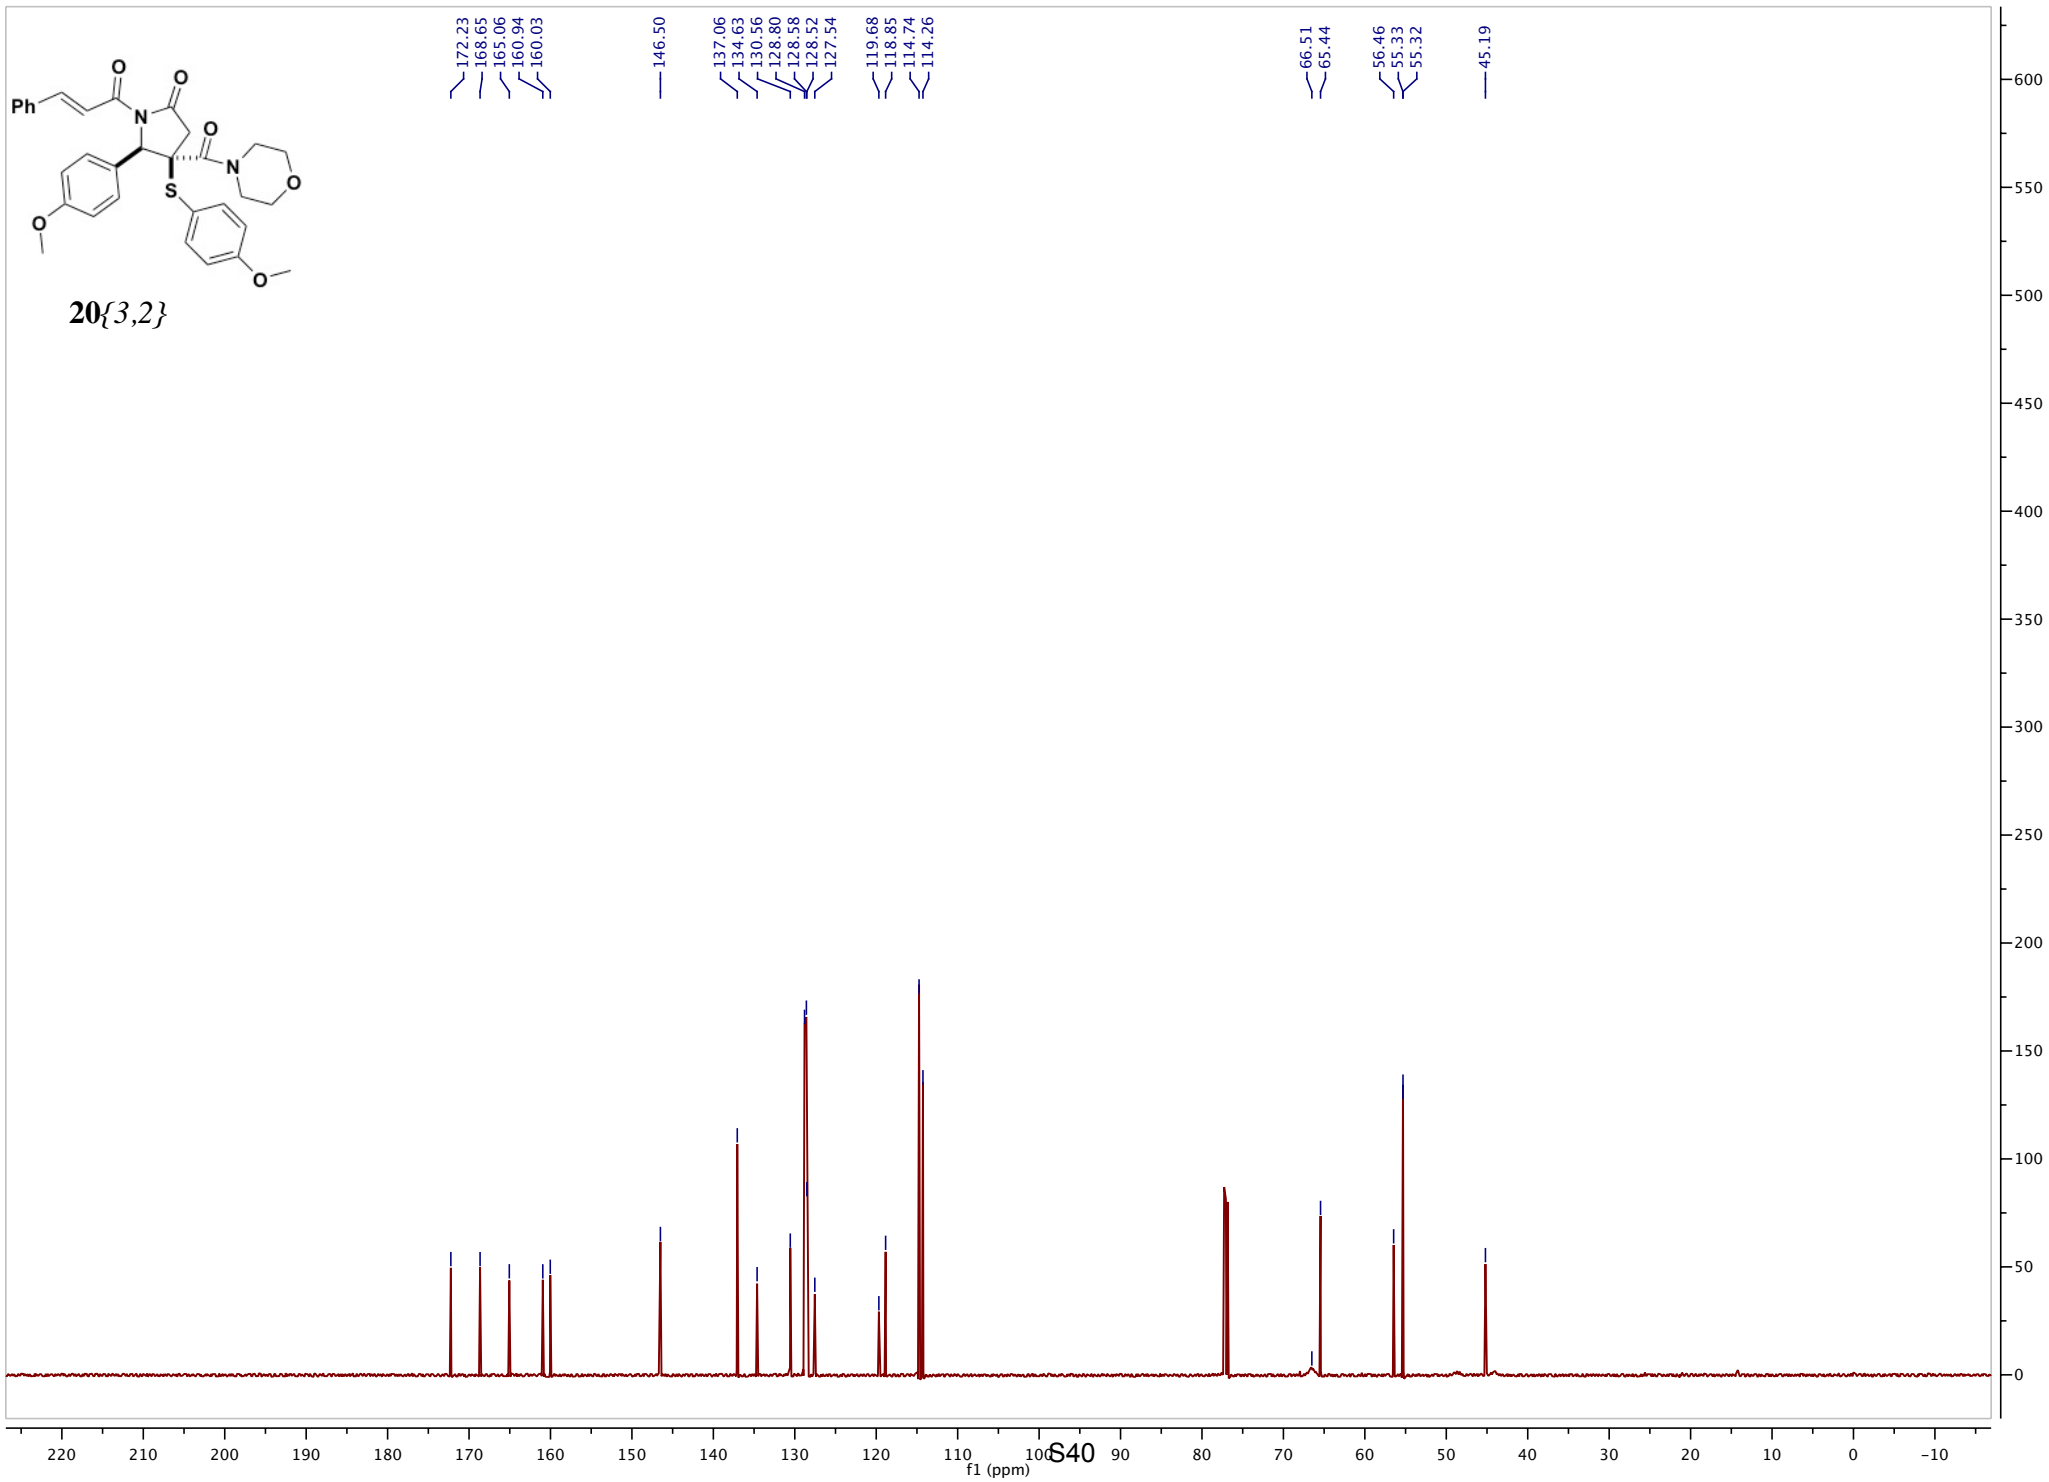



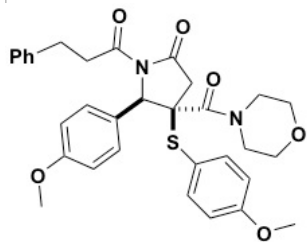

20{3,5}

8.25  
8.25  
8.25  
8.24  
8.24  
8.22  
8.22  
8.21  
8.17  
8.15  
8.15  
8.15  
8.13  
8.07  
8.05  
7.96  
7.93  
7.77  
7.74

6.63

4.84  
4.76  
4.51  
4.47  
4.29  
4.27  
4.27  
4.25  
4.24  
4.23  
4.22  
4.21  
4.21  
4.20  
4.19  
4.19  
4.17  
4.16  
4.15  
4.14  
4.13  
4.00  
3.96  
3.91  
3.90  
3.89  
3.89  
3.86  
3.86  
3.85  
3.84  
3.83  
3.82  
3.82  
3.80  
3.80

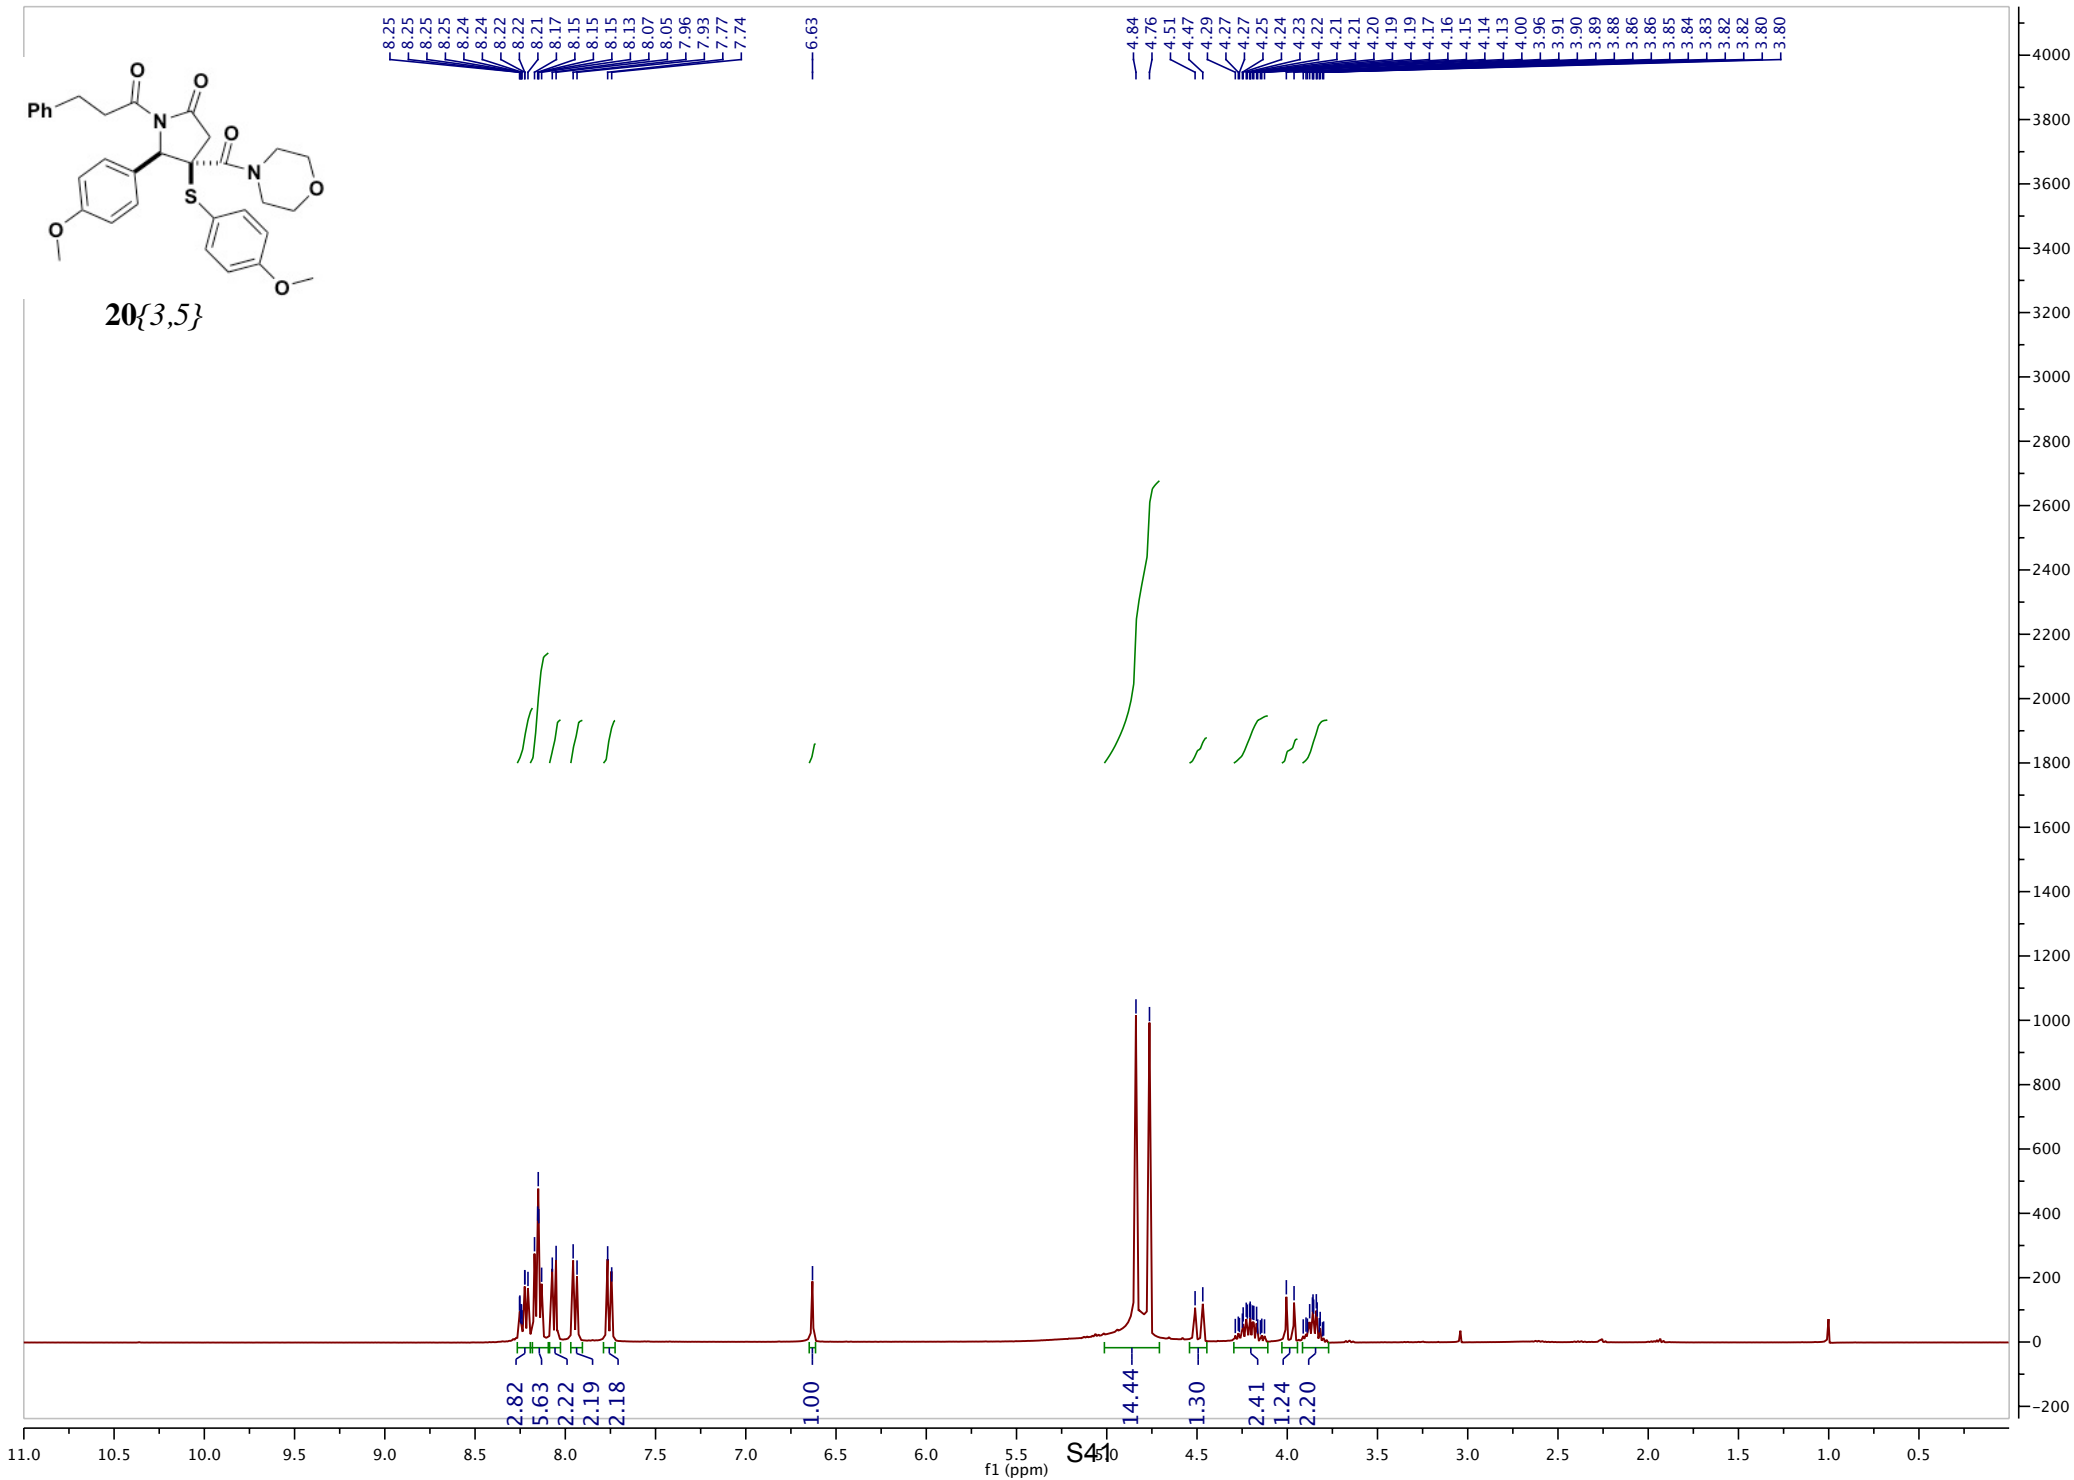

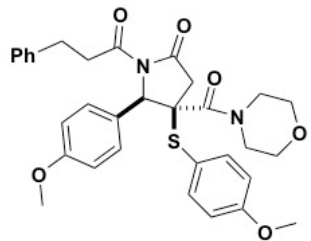

20{3,5}

172.49  
172.20  
168.95

161.17  
160.27

140.73  
137.23

128.74  
128.67  
128.60  
127.68

126.29

119.91  
114.96  
114.49

66.74  
65.31

56.76  
55.57  
55.55

45.14

39.13

30.15

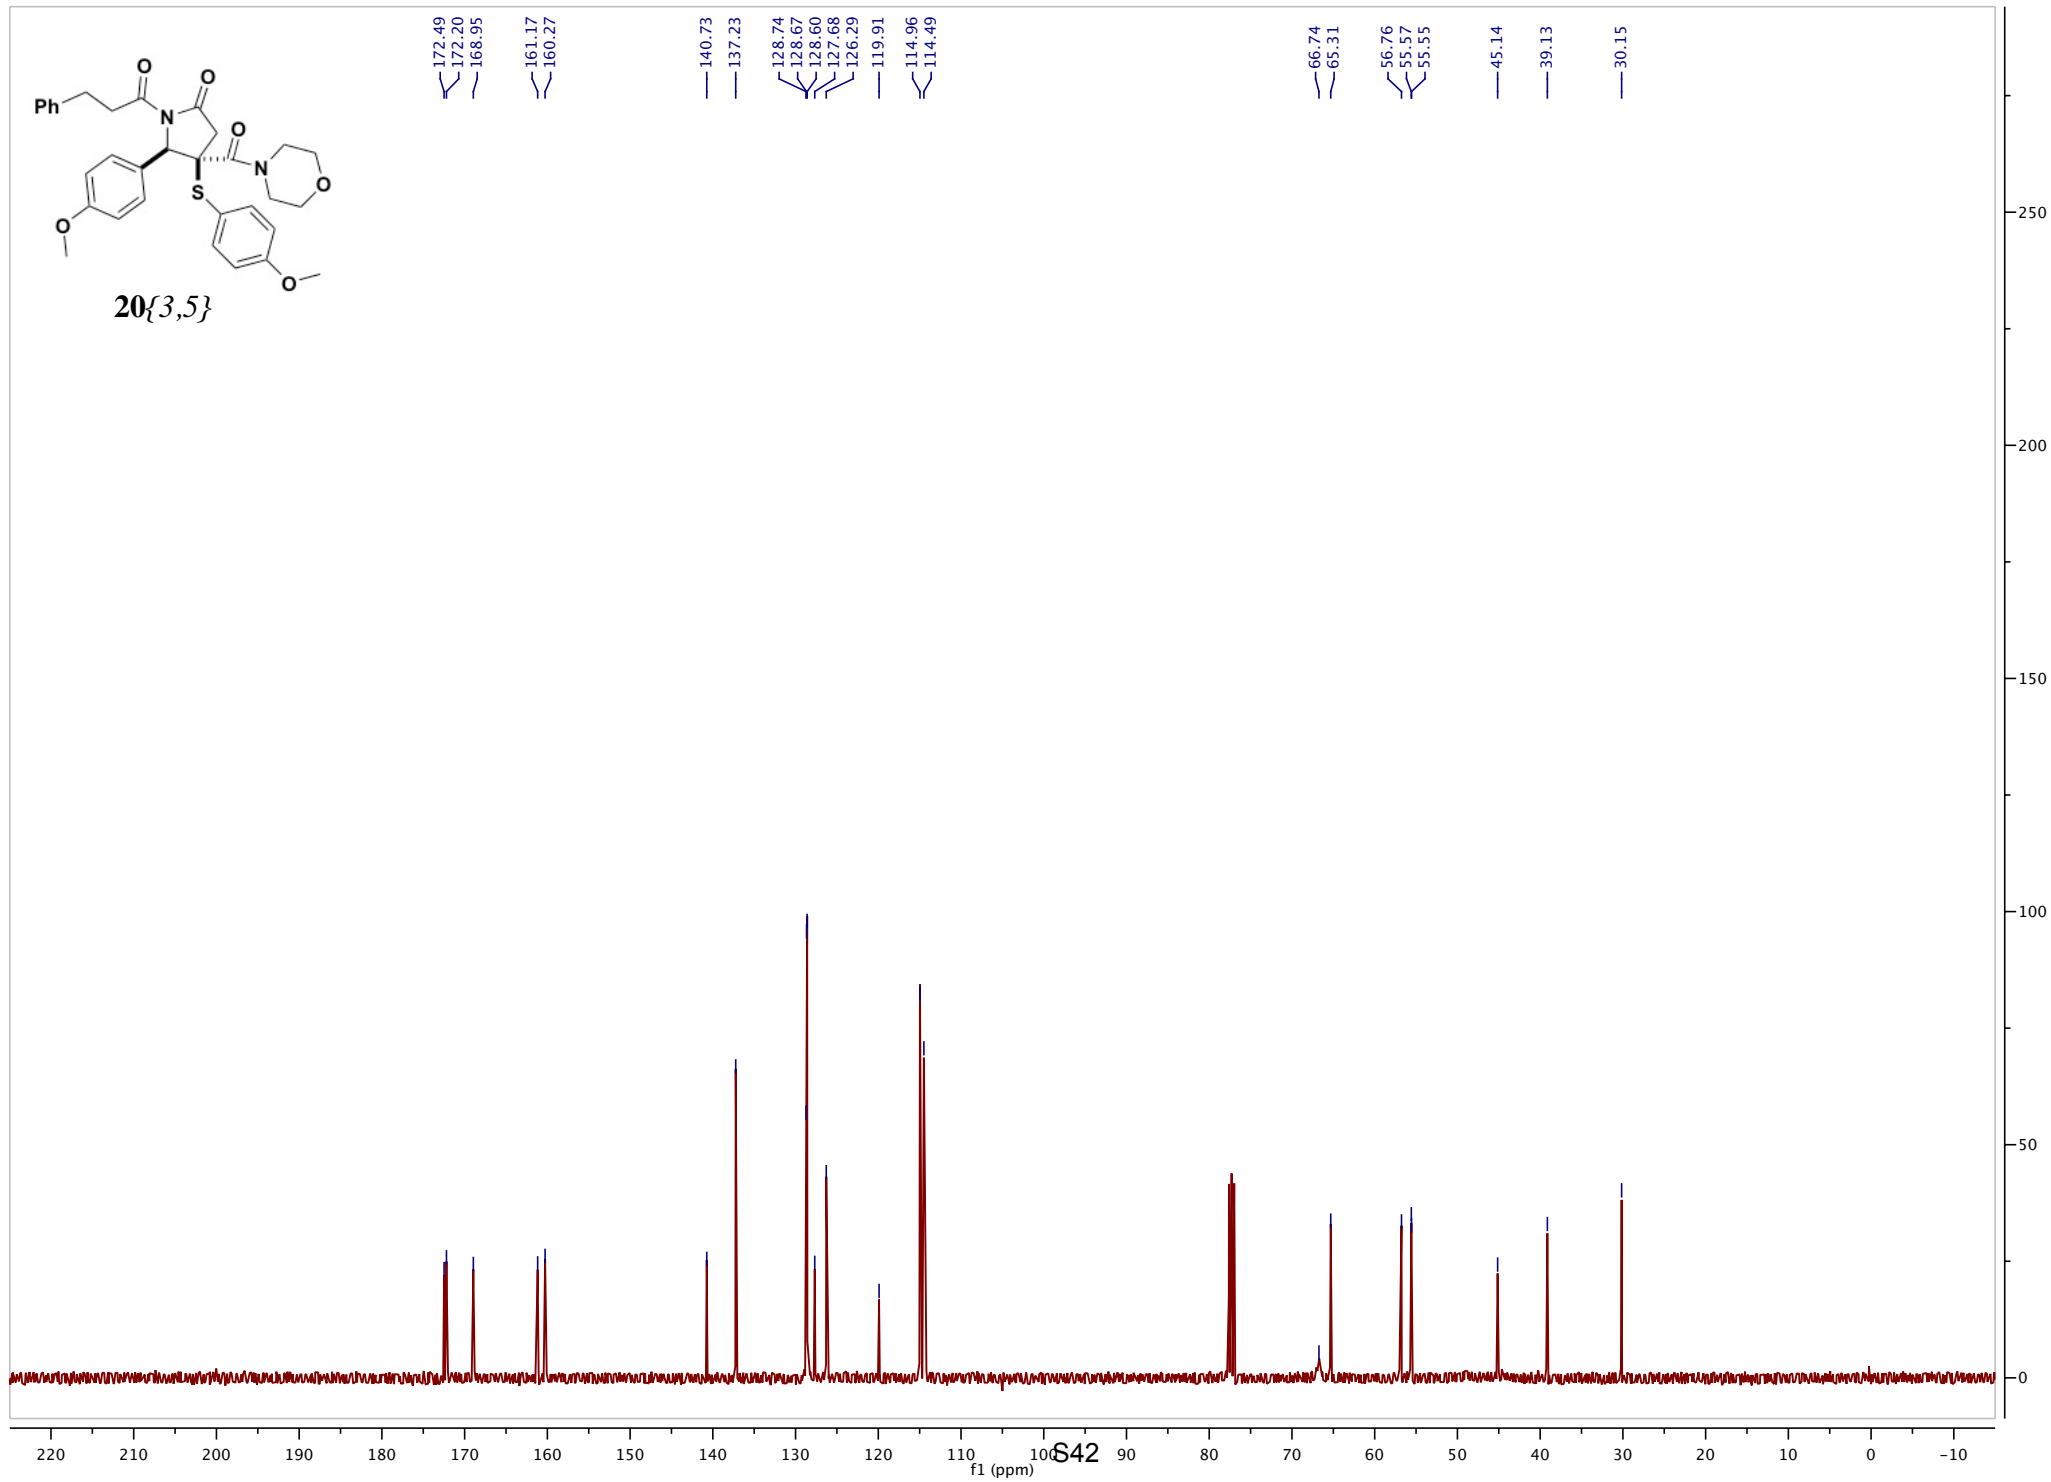

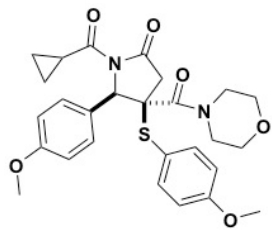

20{3,6}

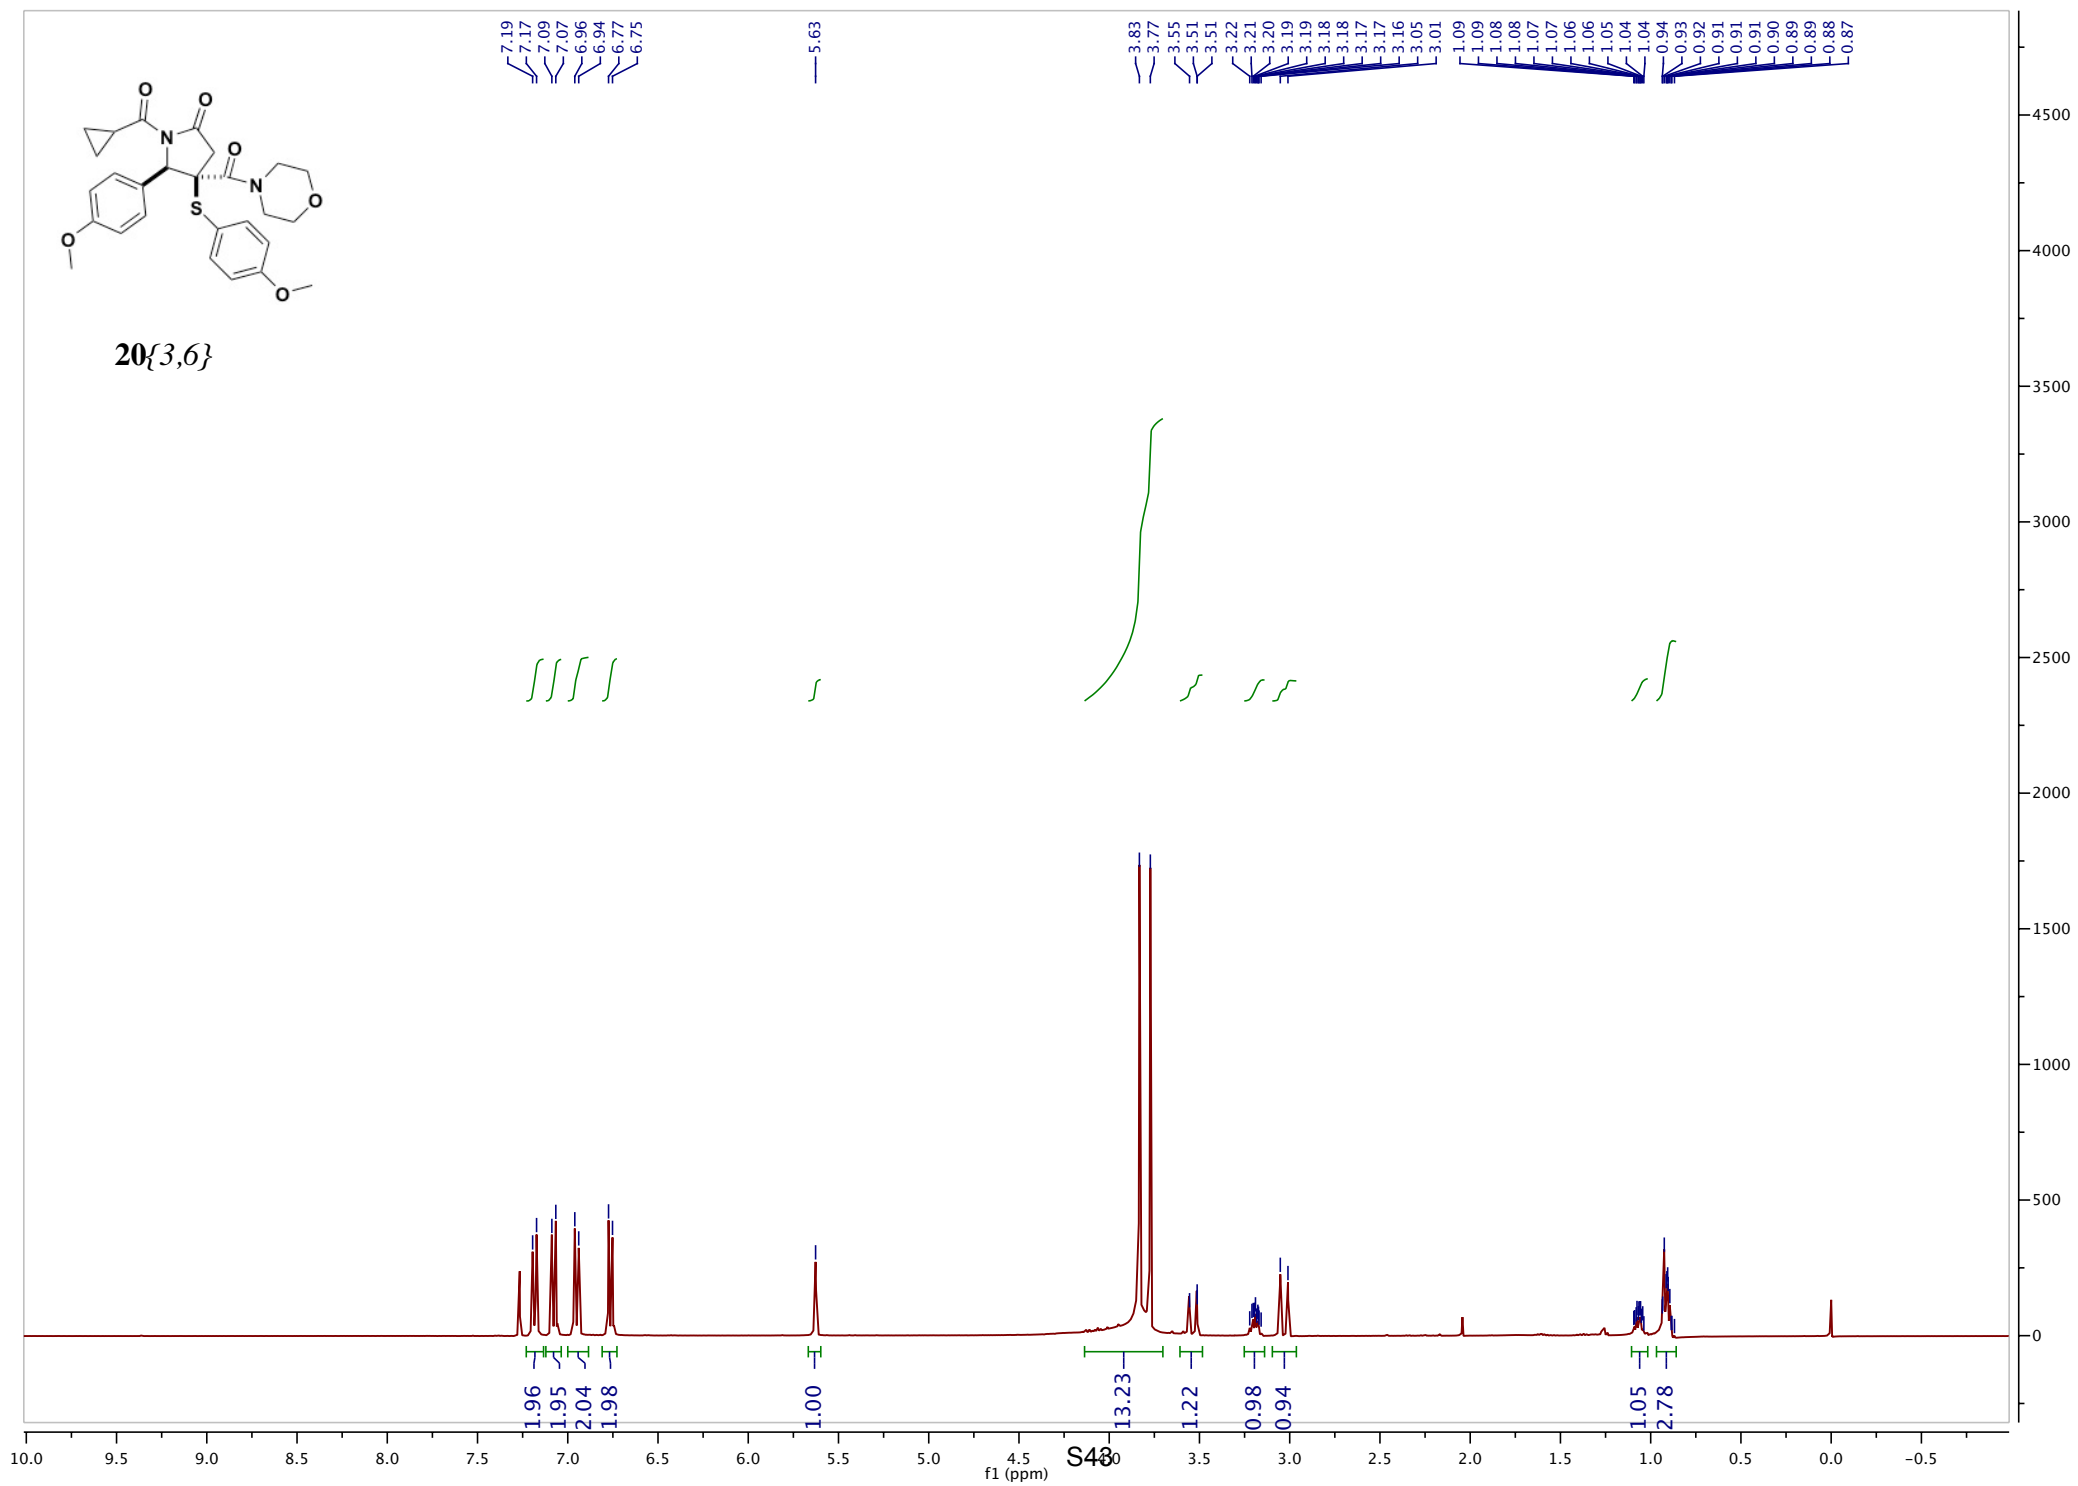



20{3,6}

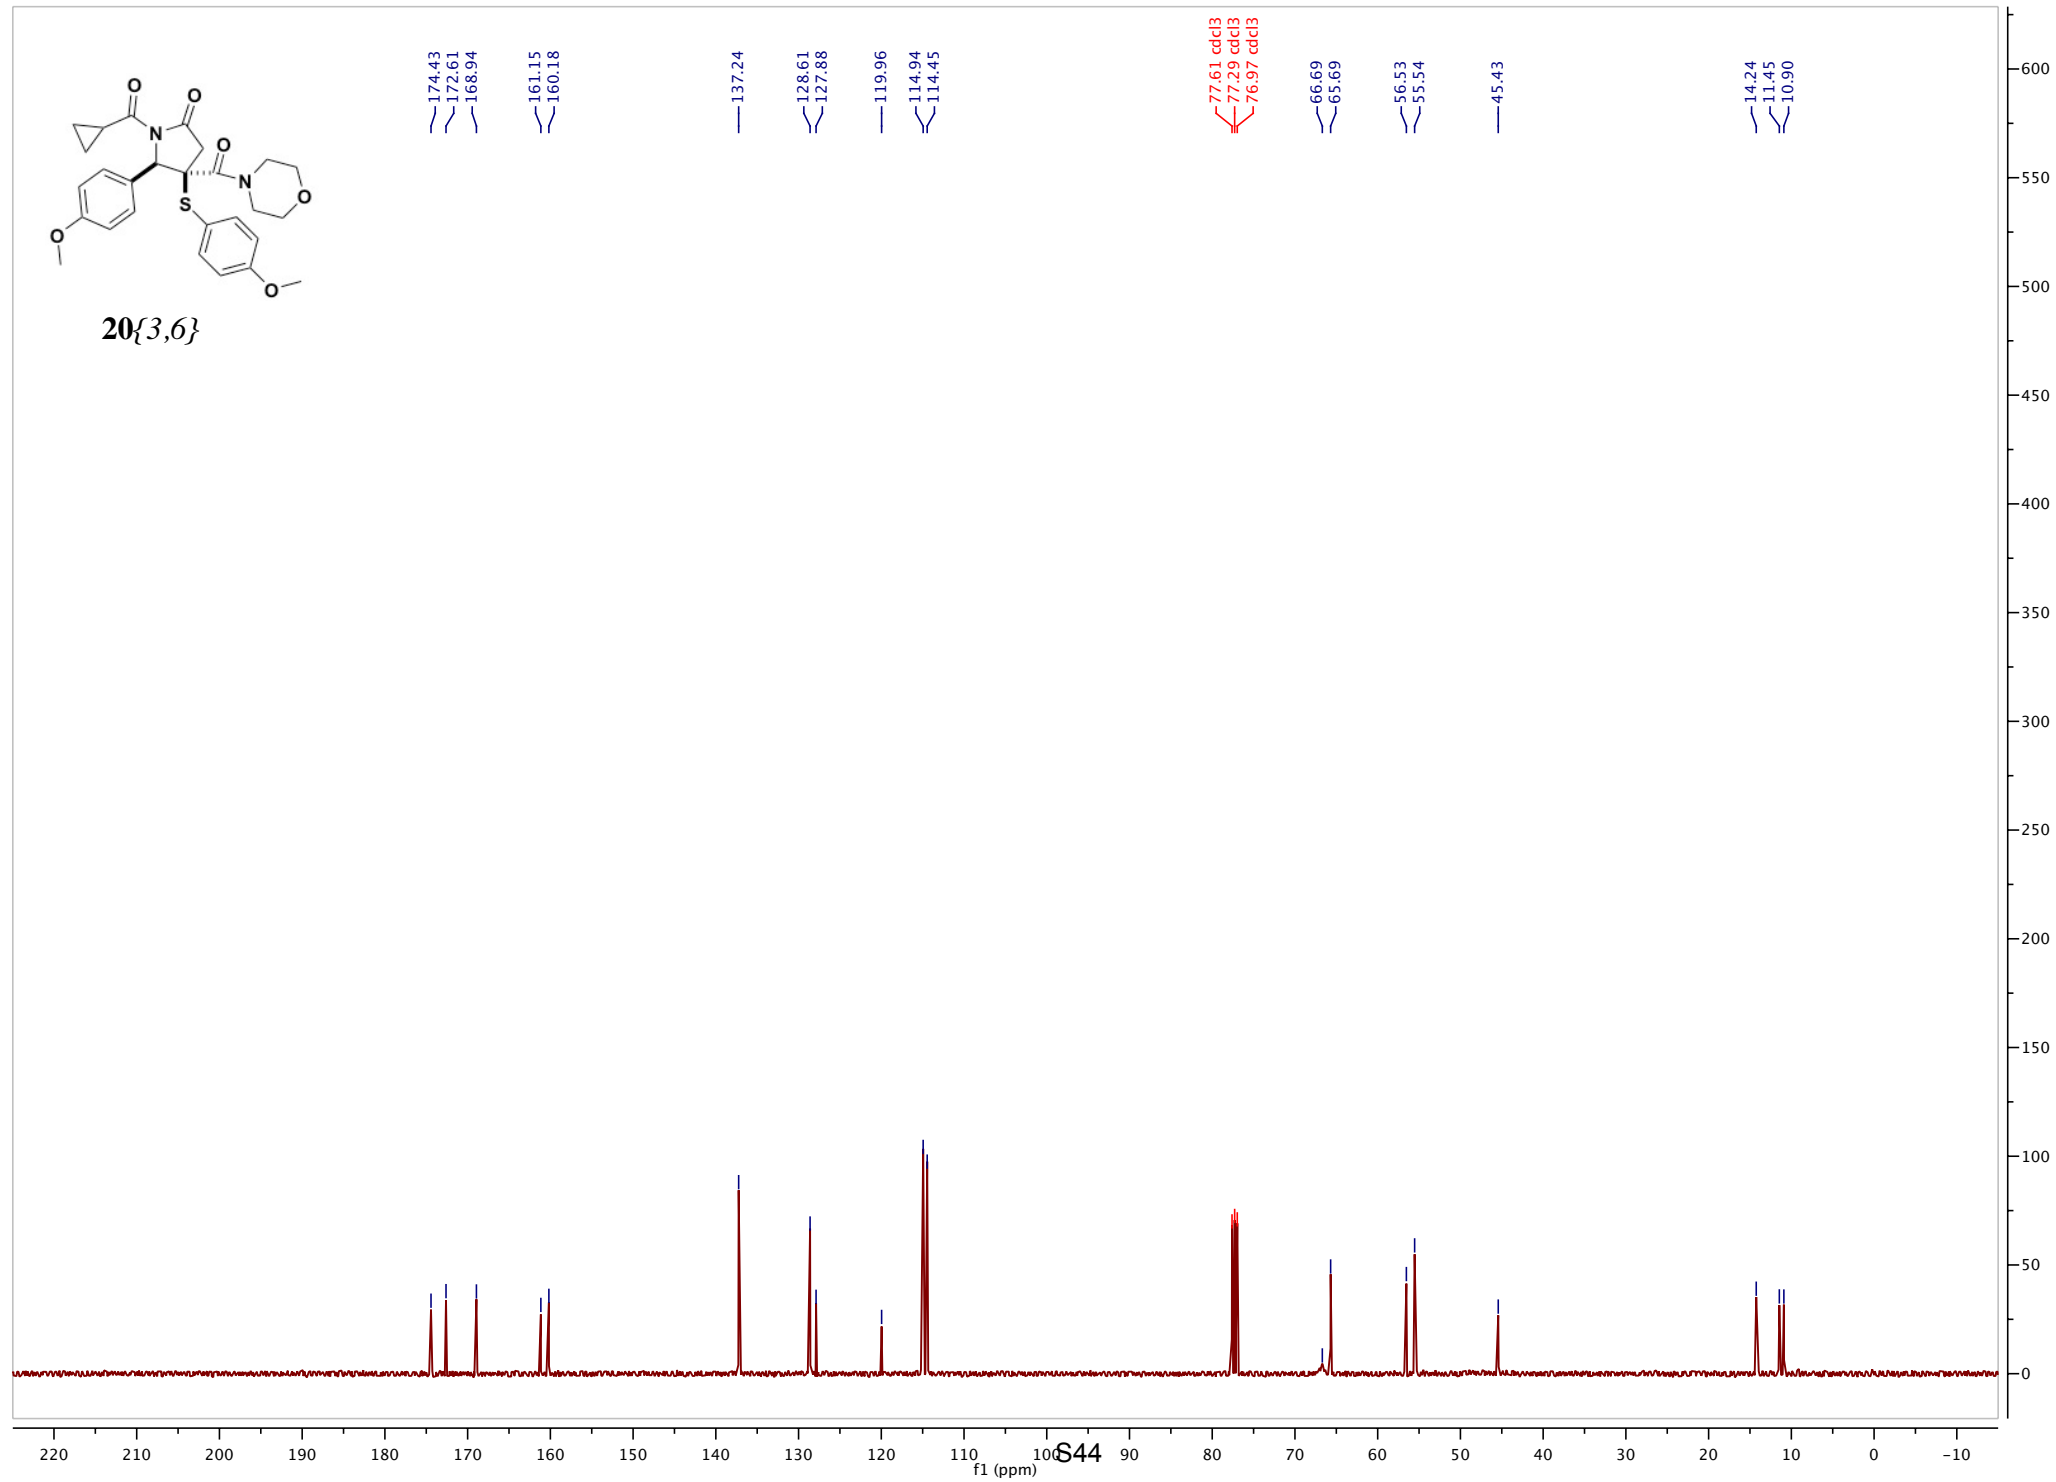

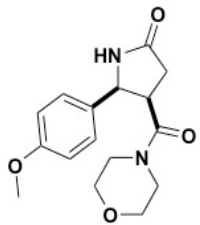

**31{3}syn**

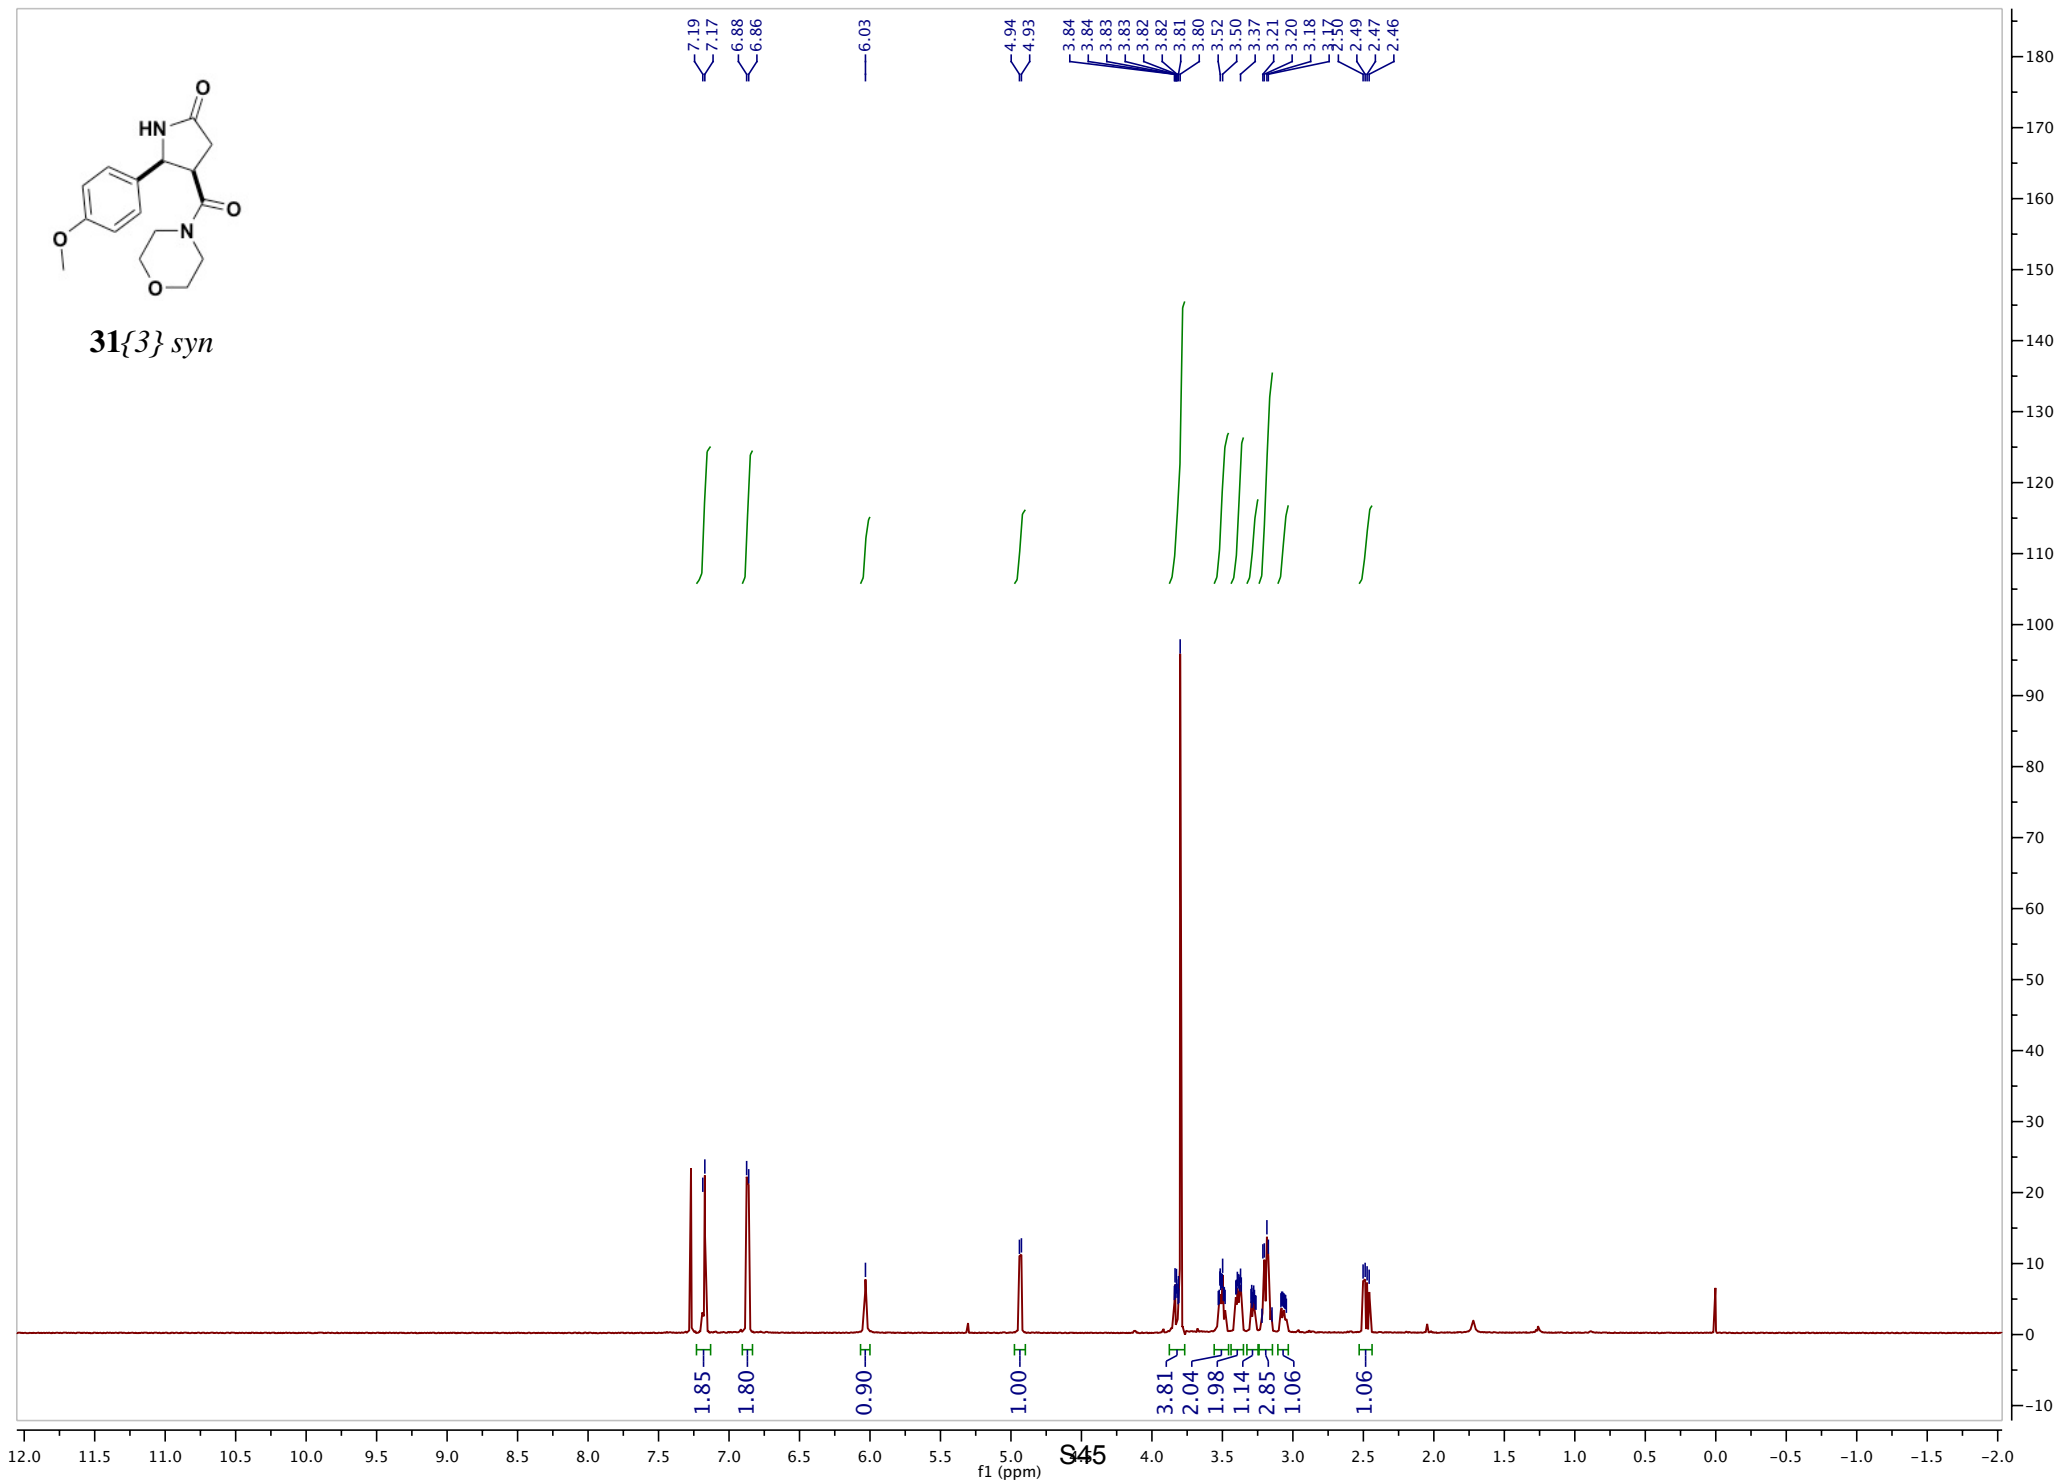



**31{3}** *syn*

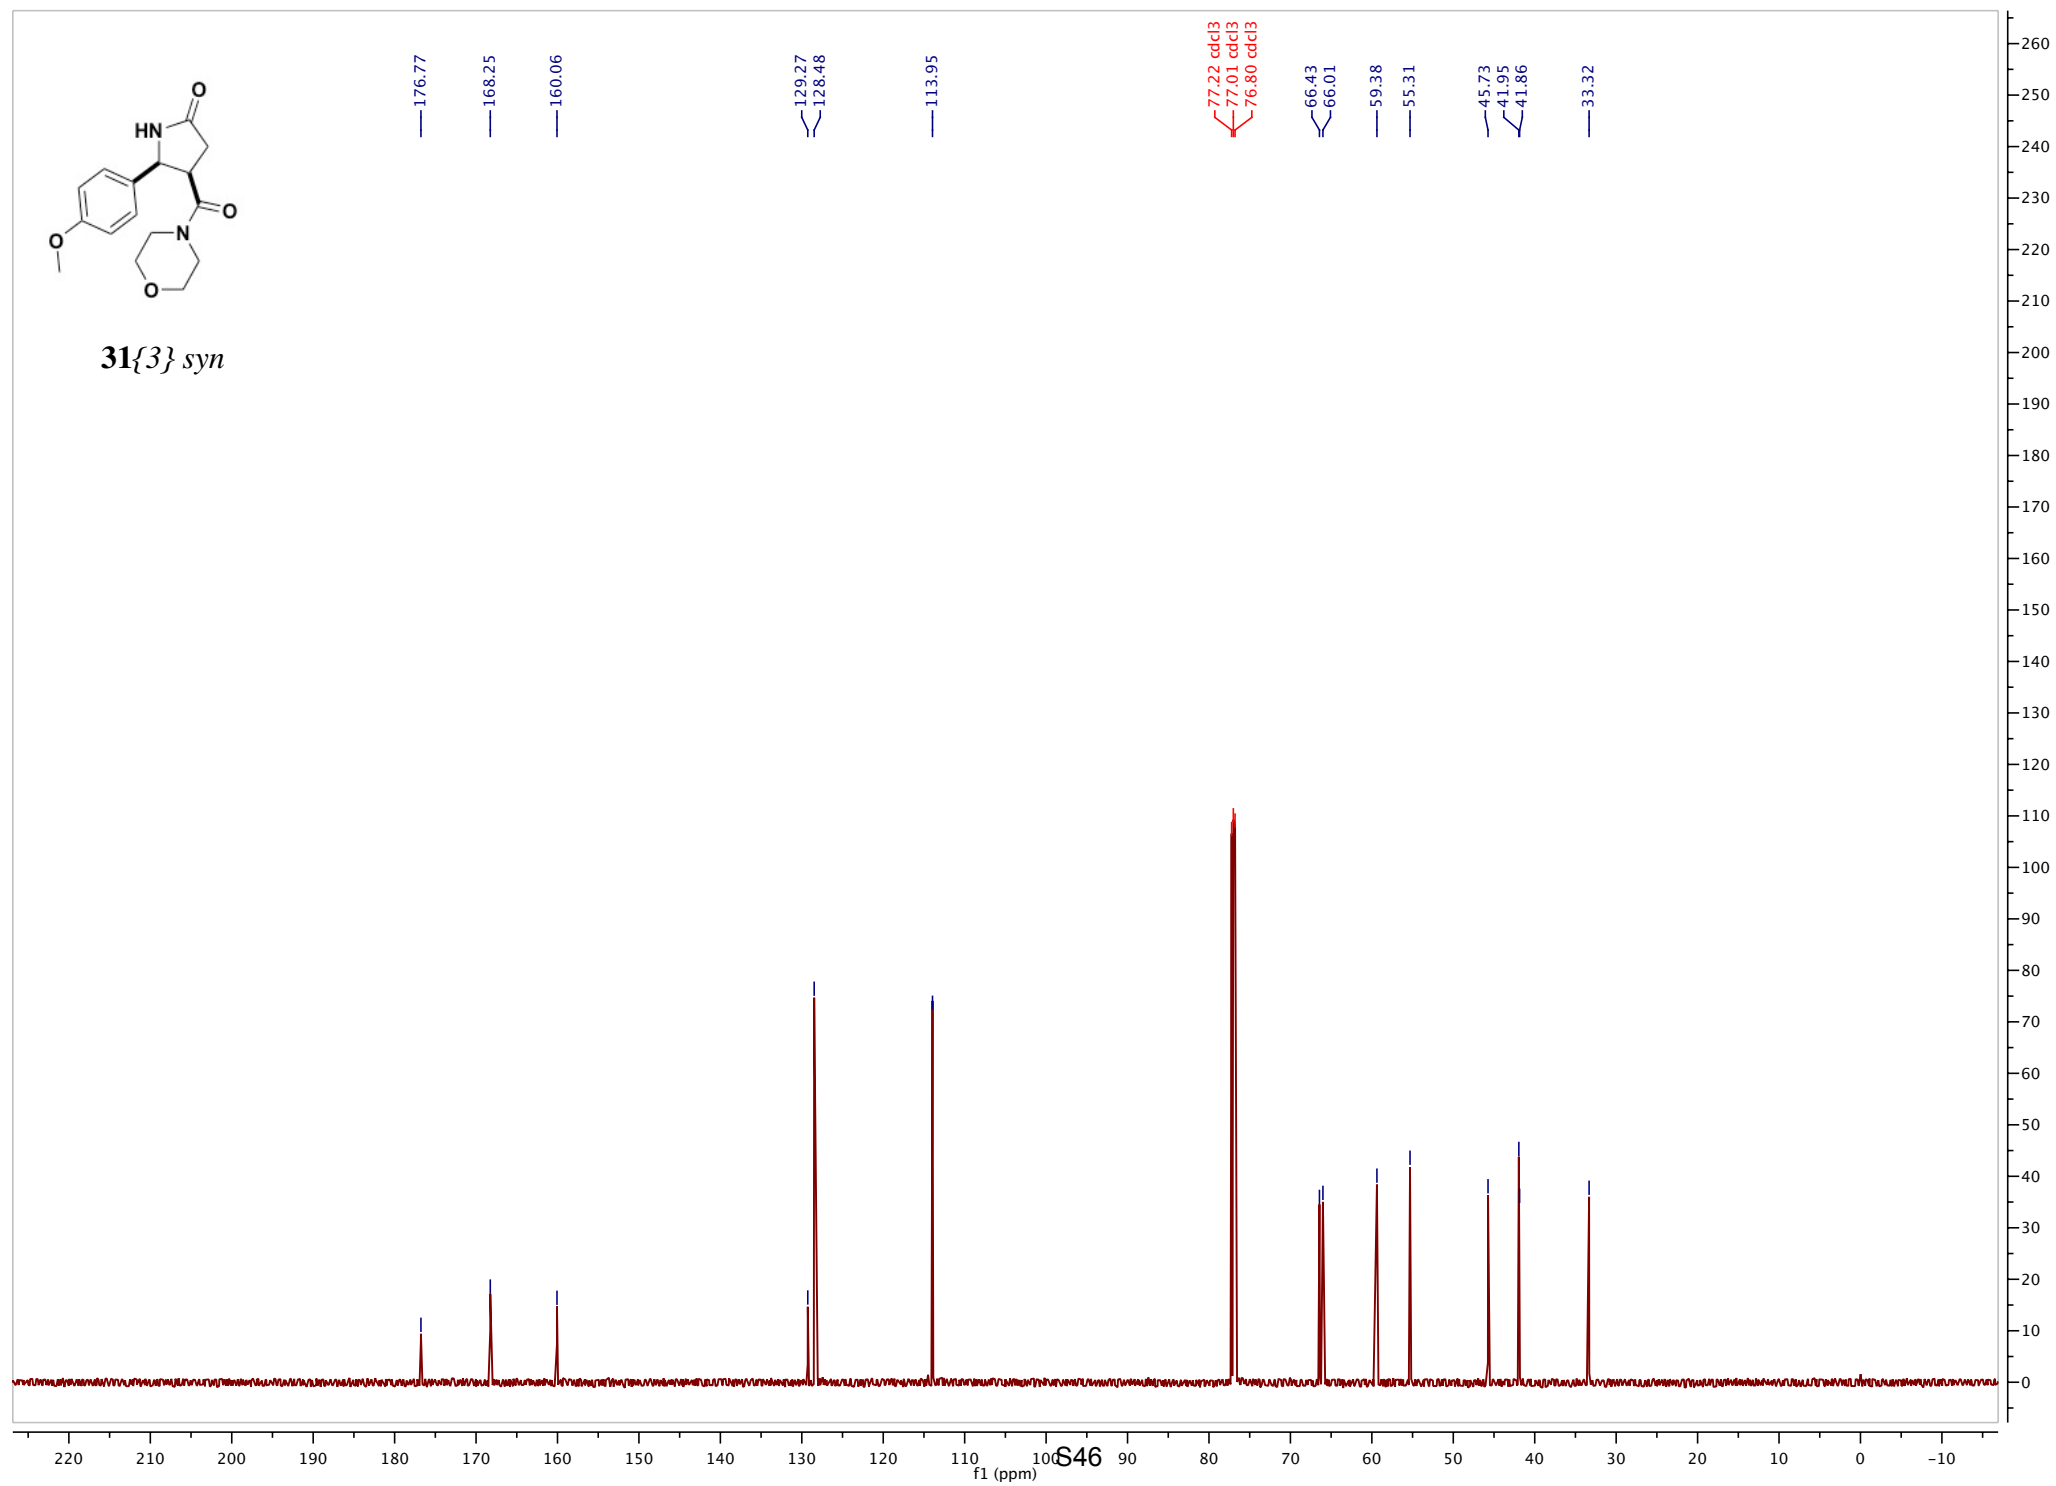

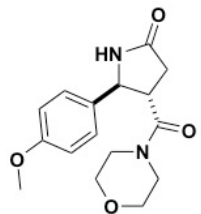

**31{3} anti**

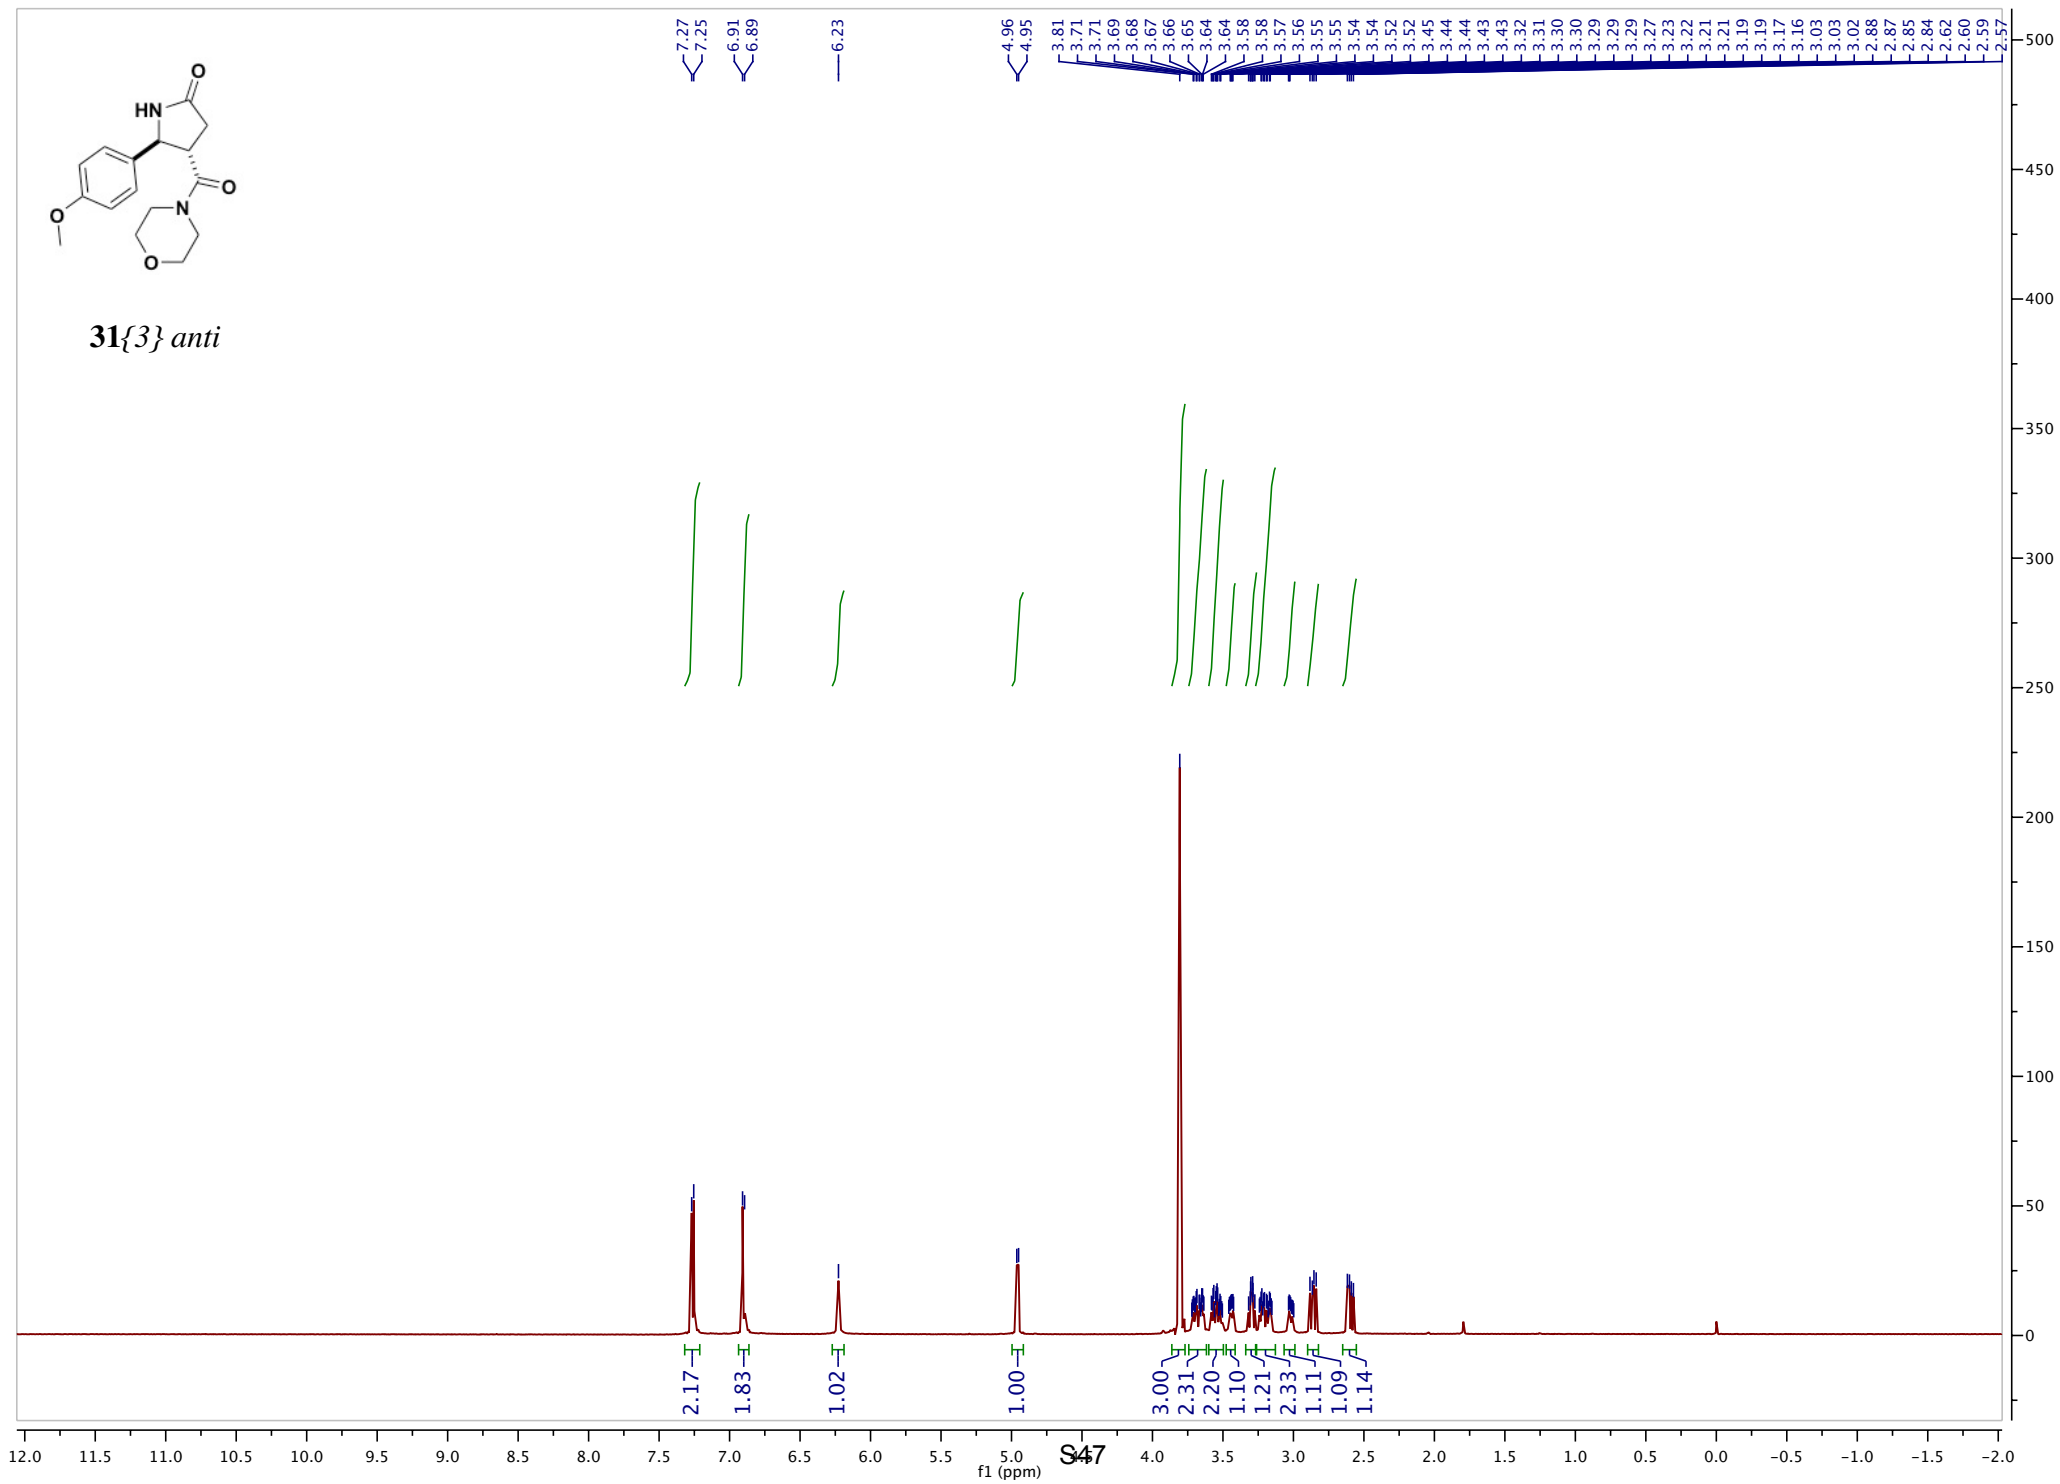

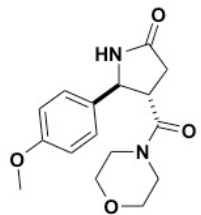

**31{3} anti**

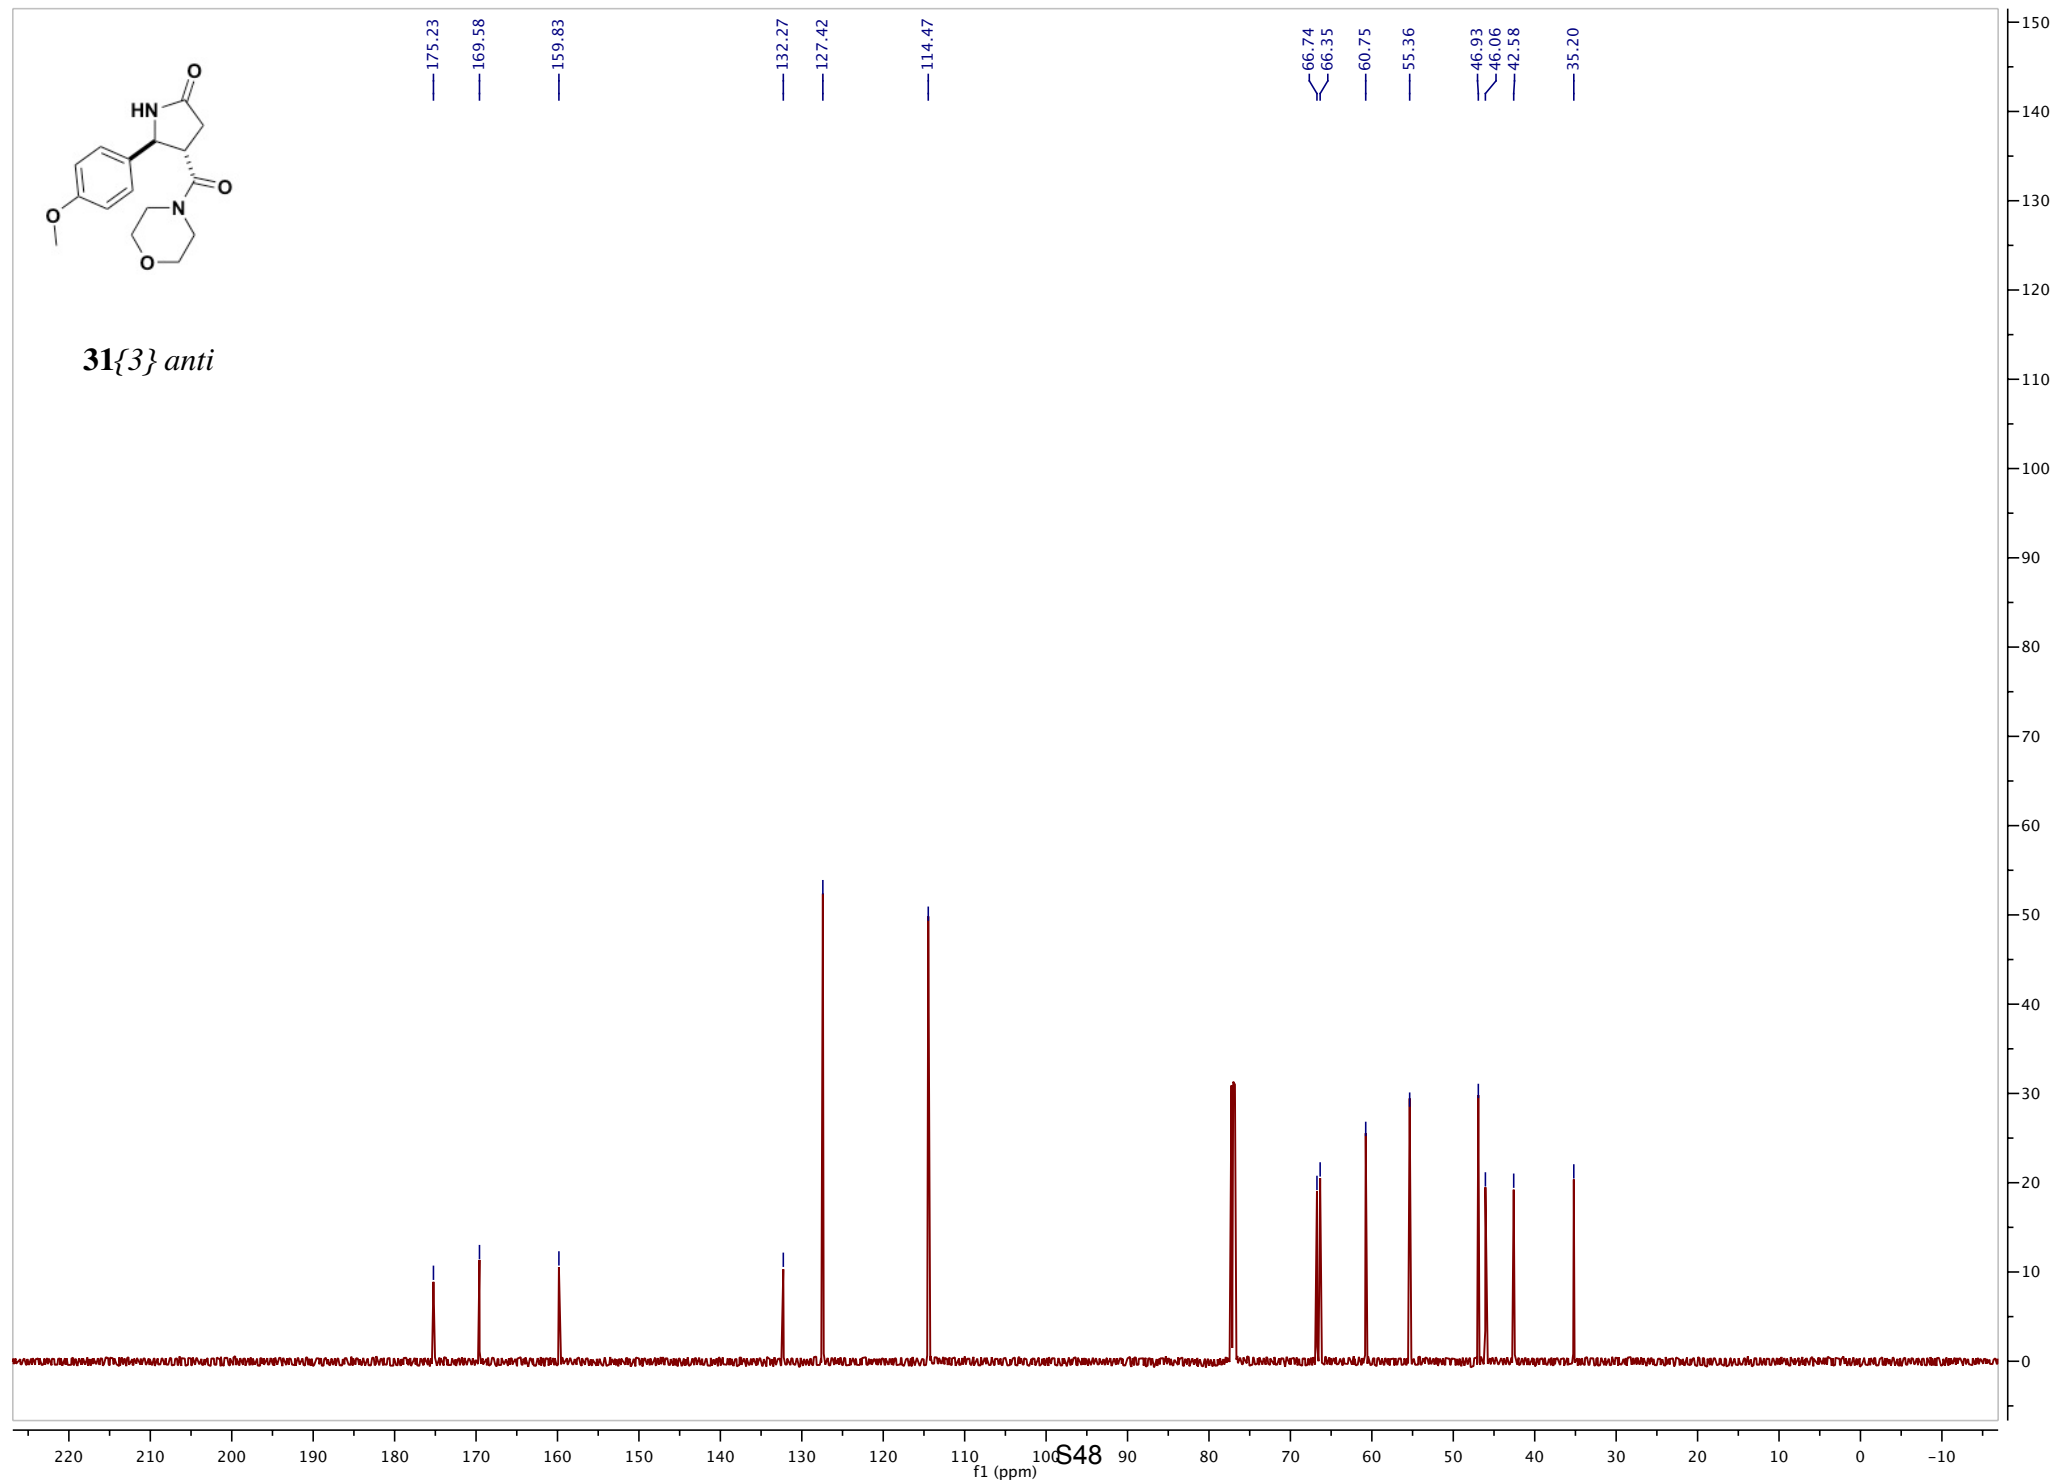



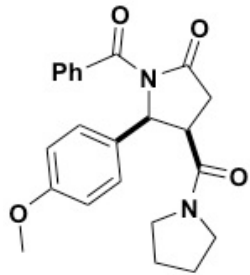

21{2,1}

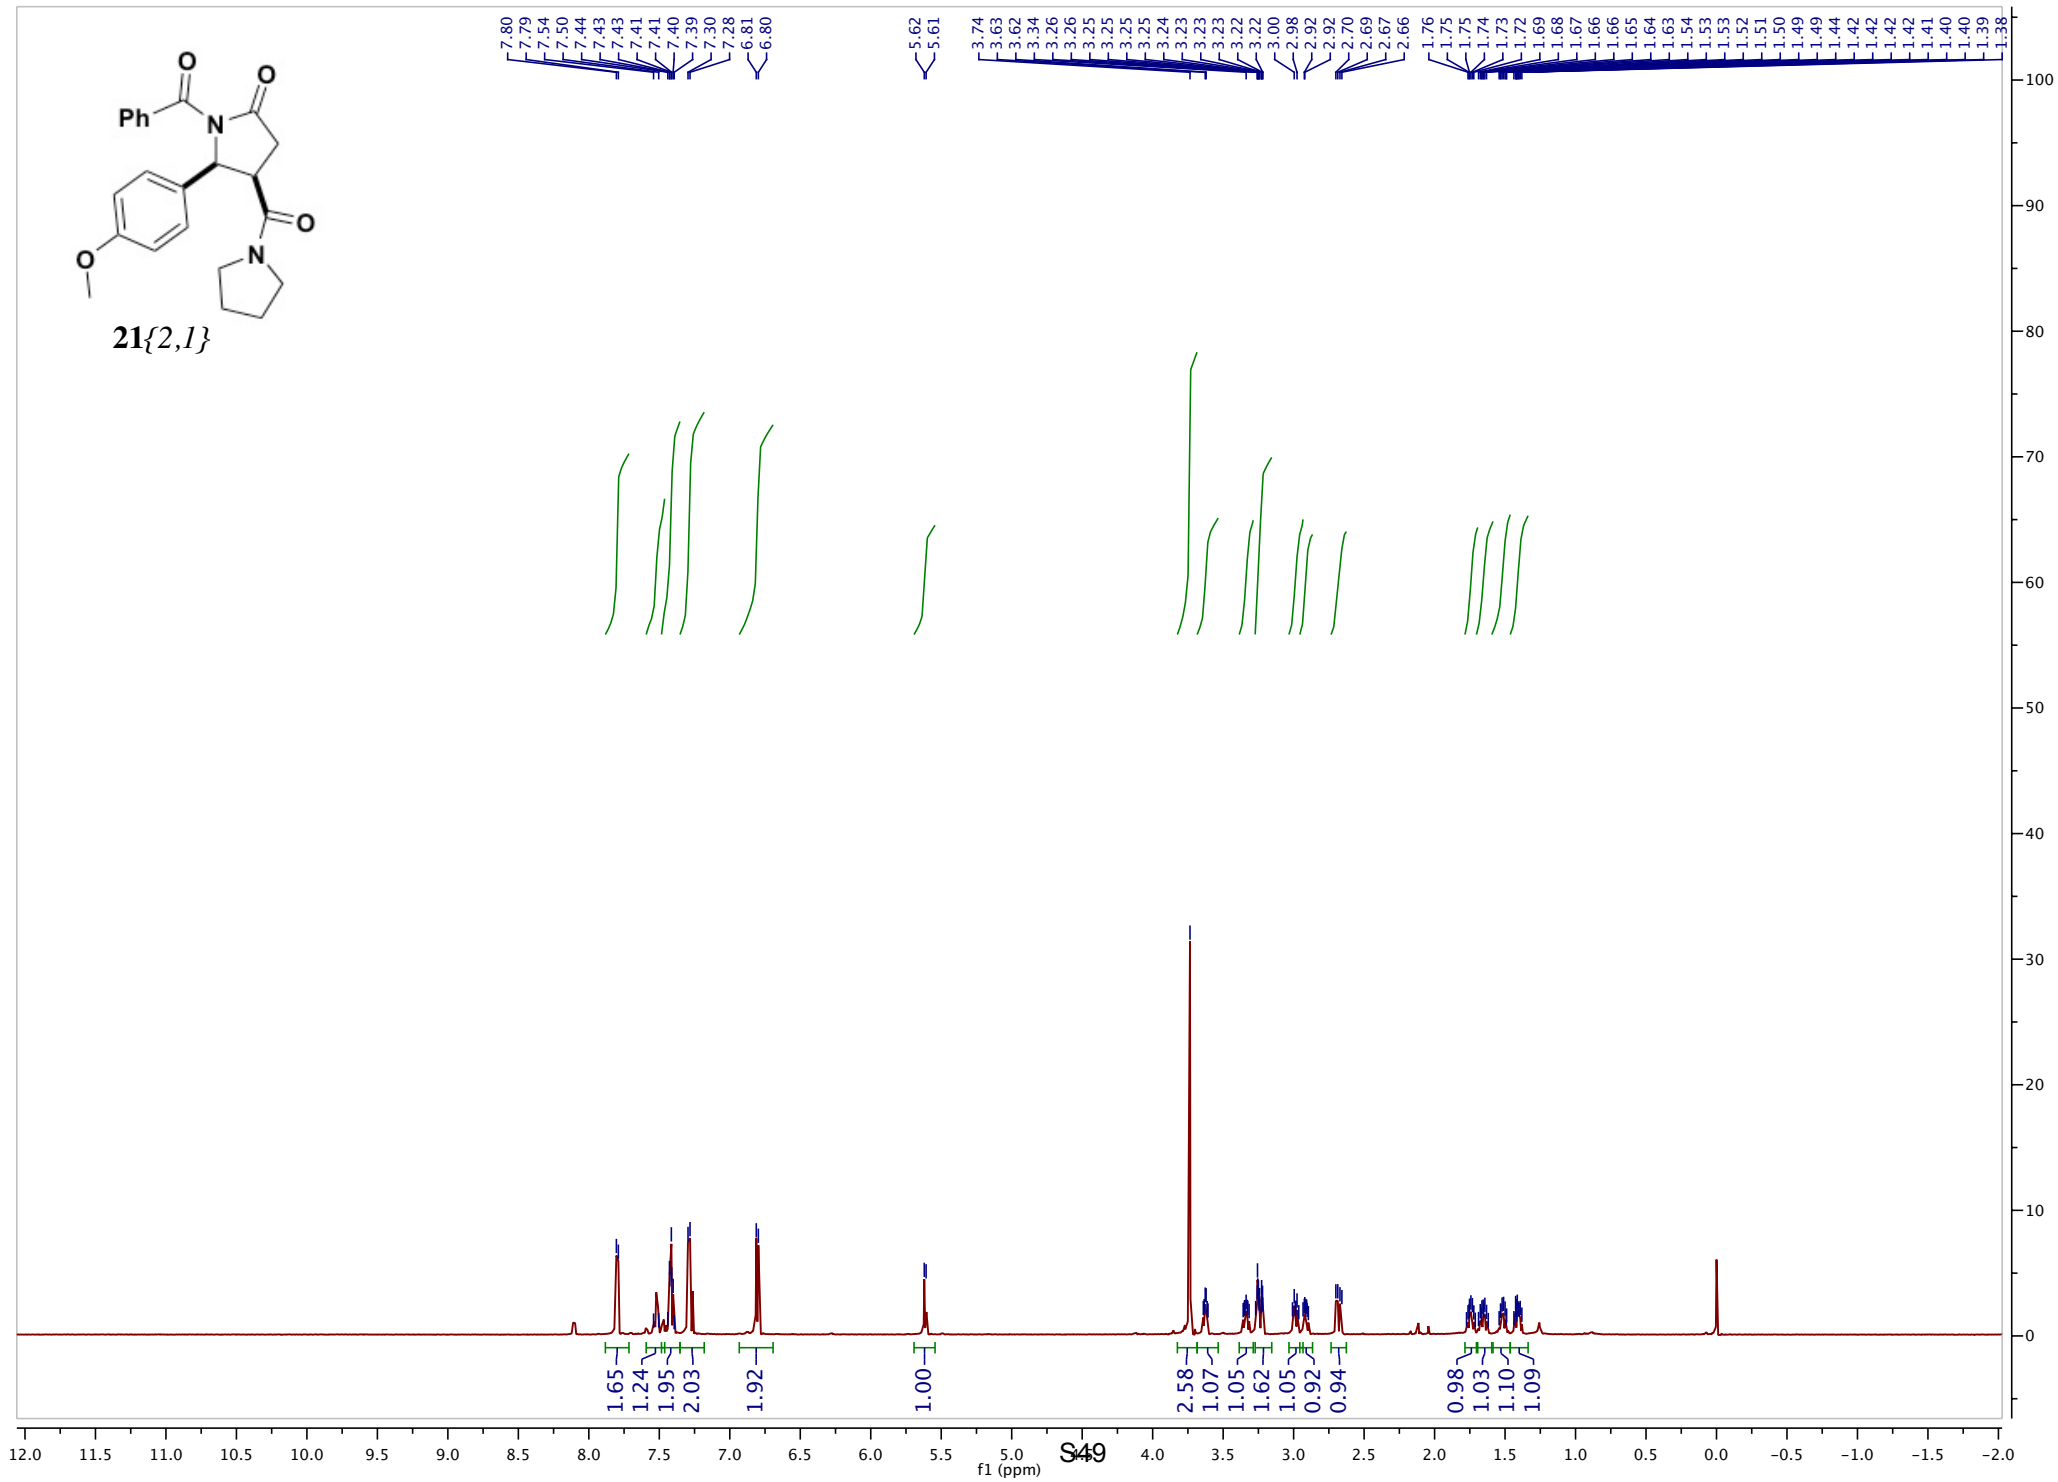

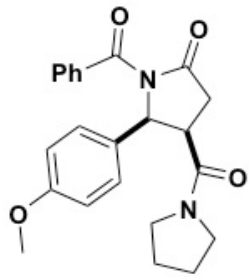

21{2,1}

174.06  
170.57  
168.44

159.61

134.23  
133.39  
132.72  
130.08  
129.80  
128.41  
128.00  
127.83

113.83

62.94

55.27

46.36  
45.70  
41.36

35.75

25.77  
23.95

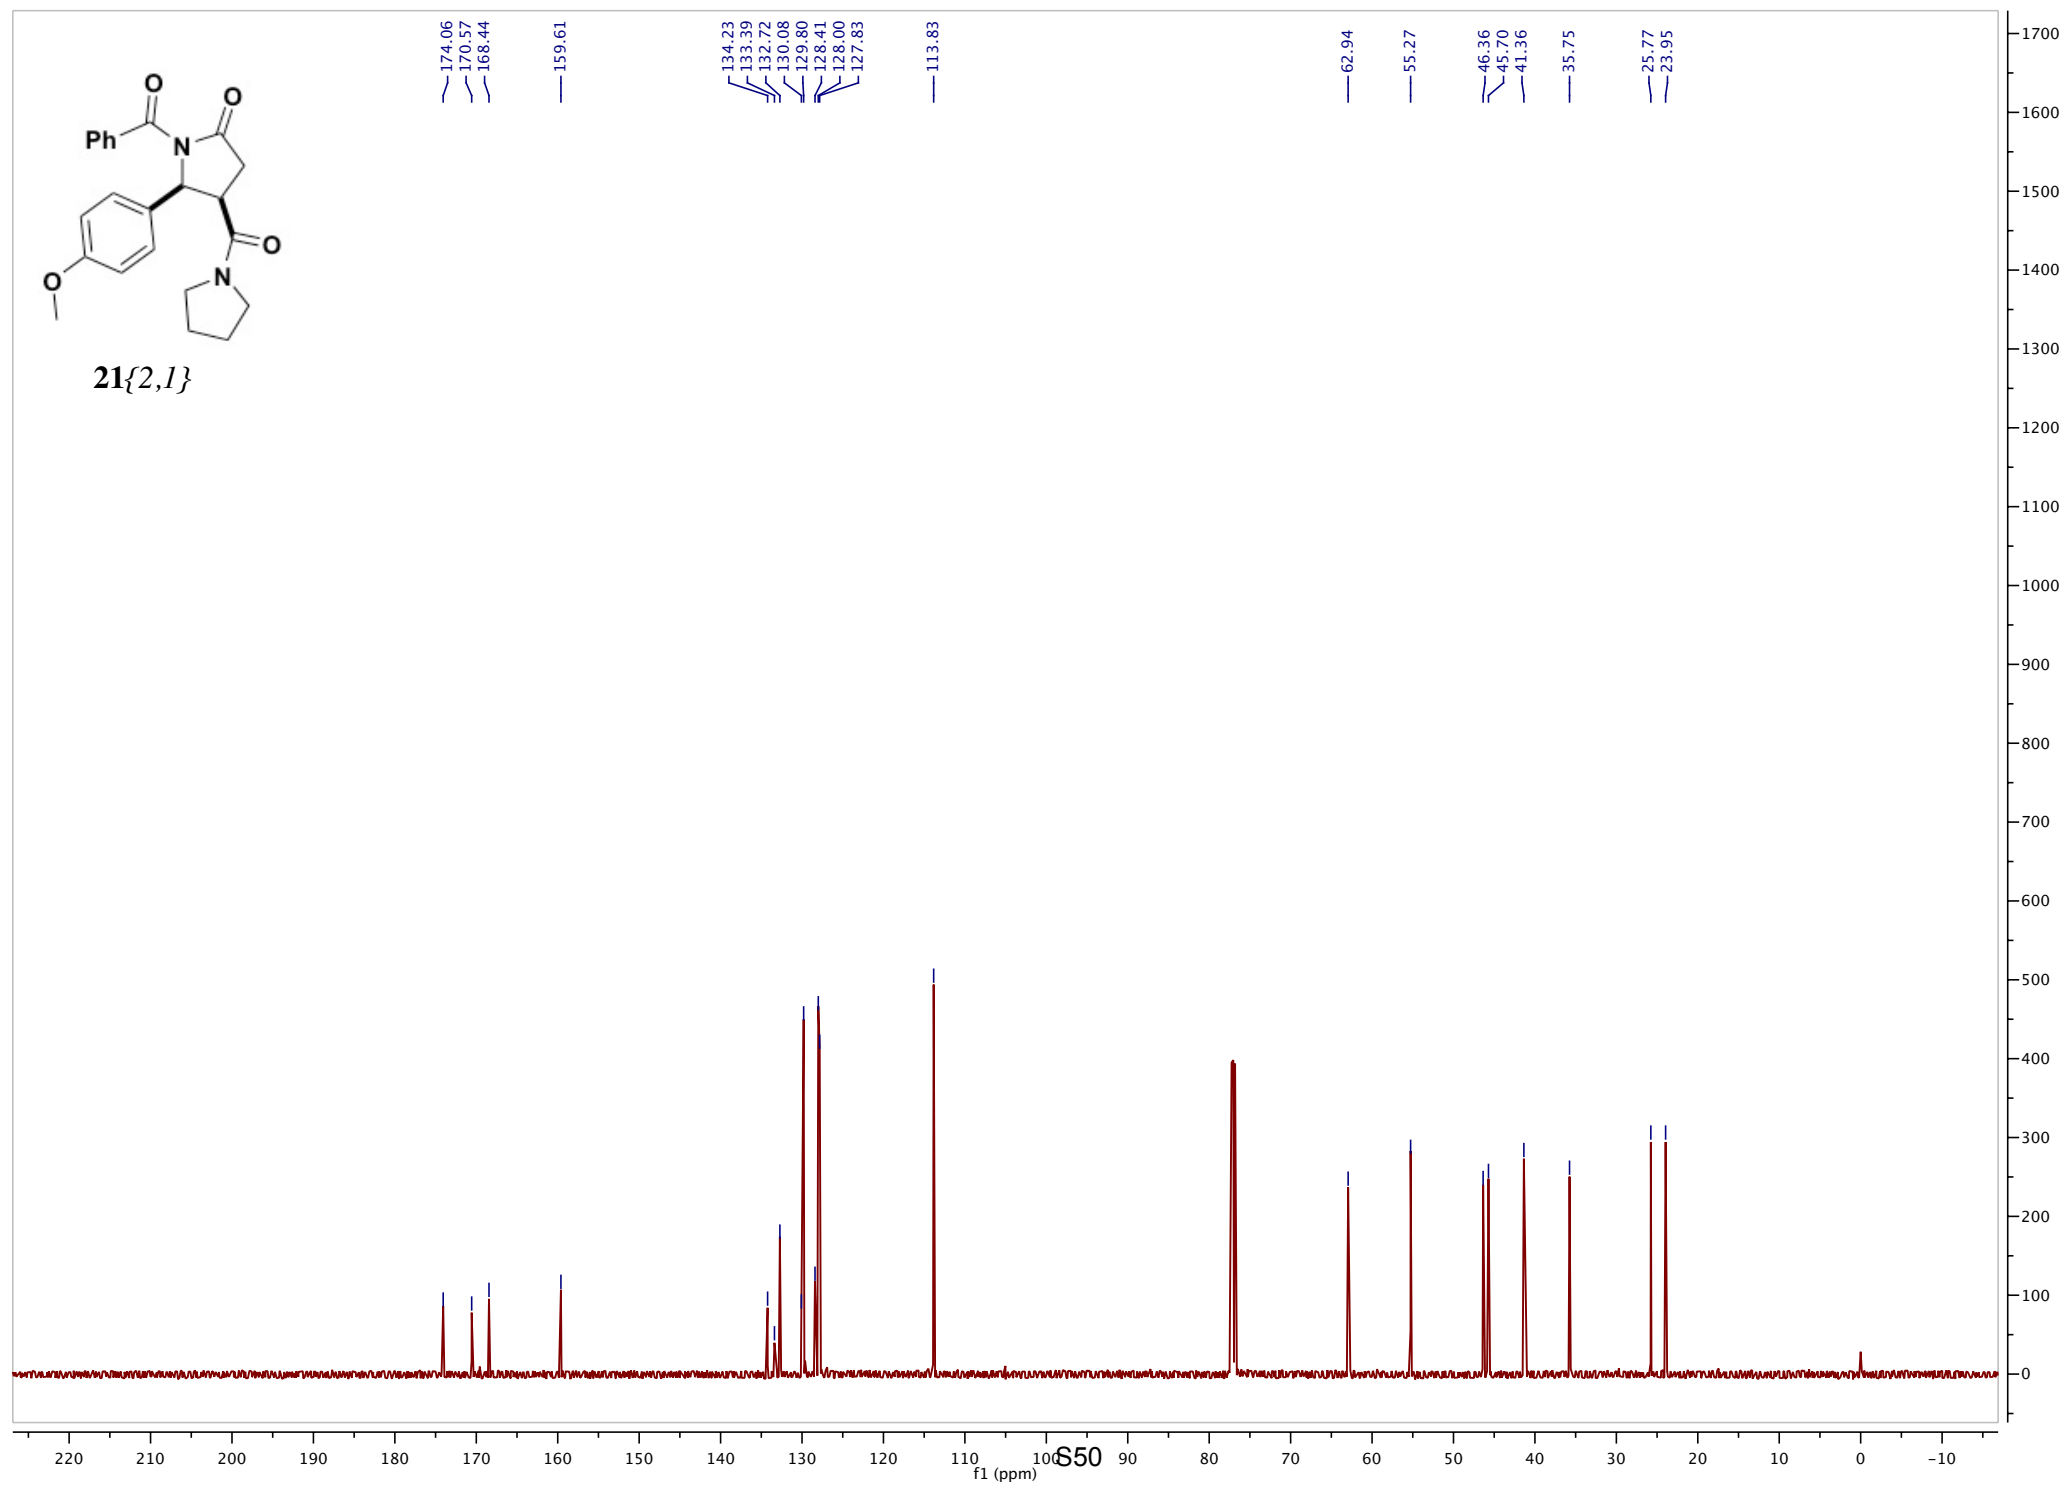

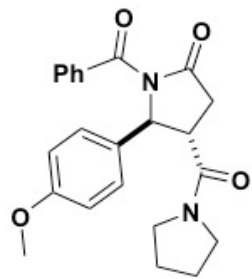

22{2,1}

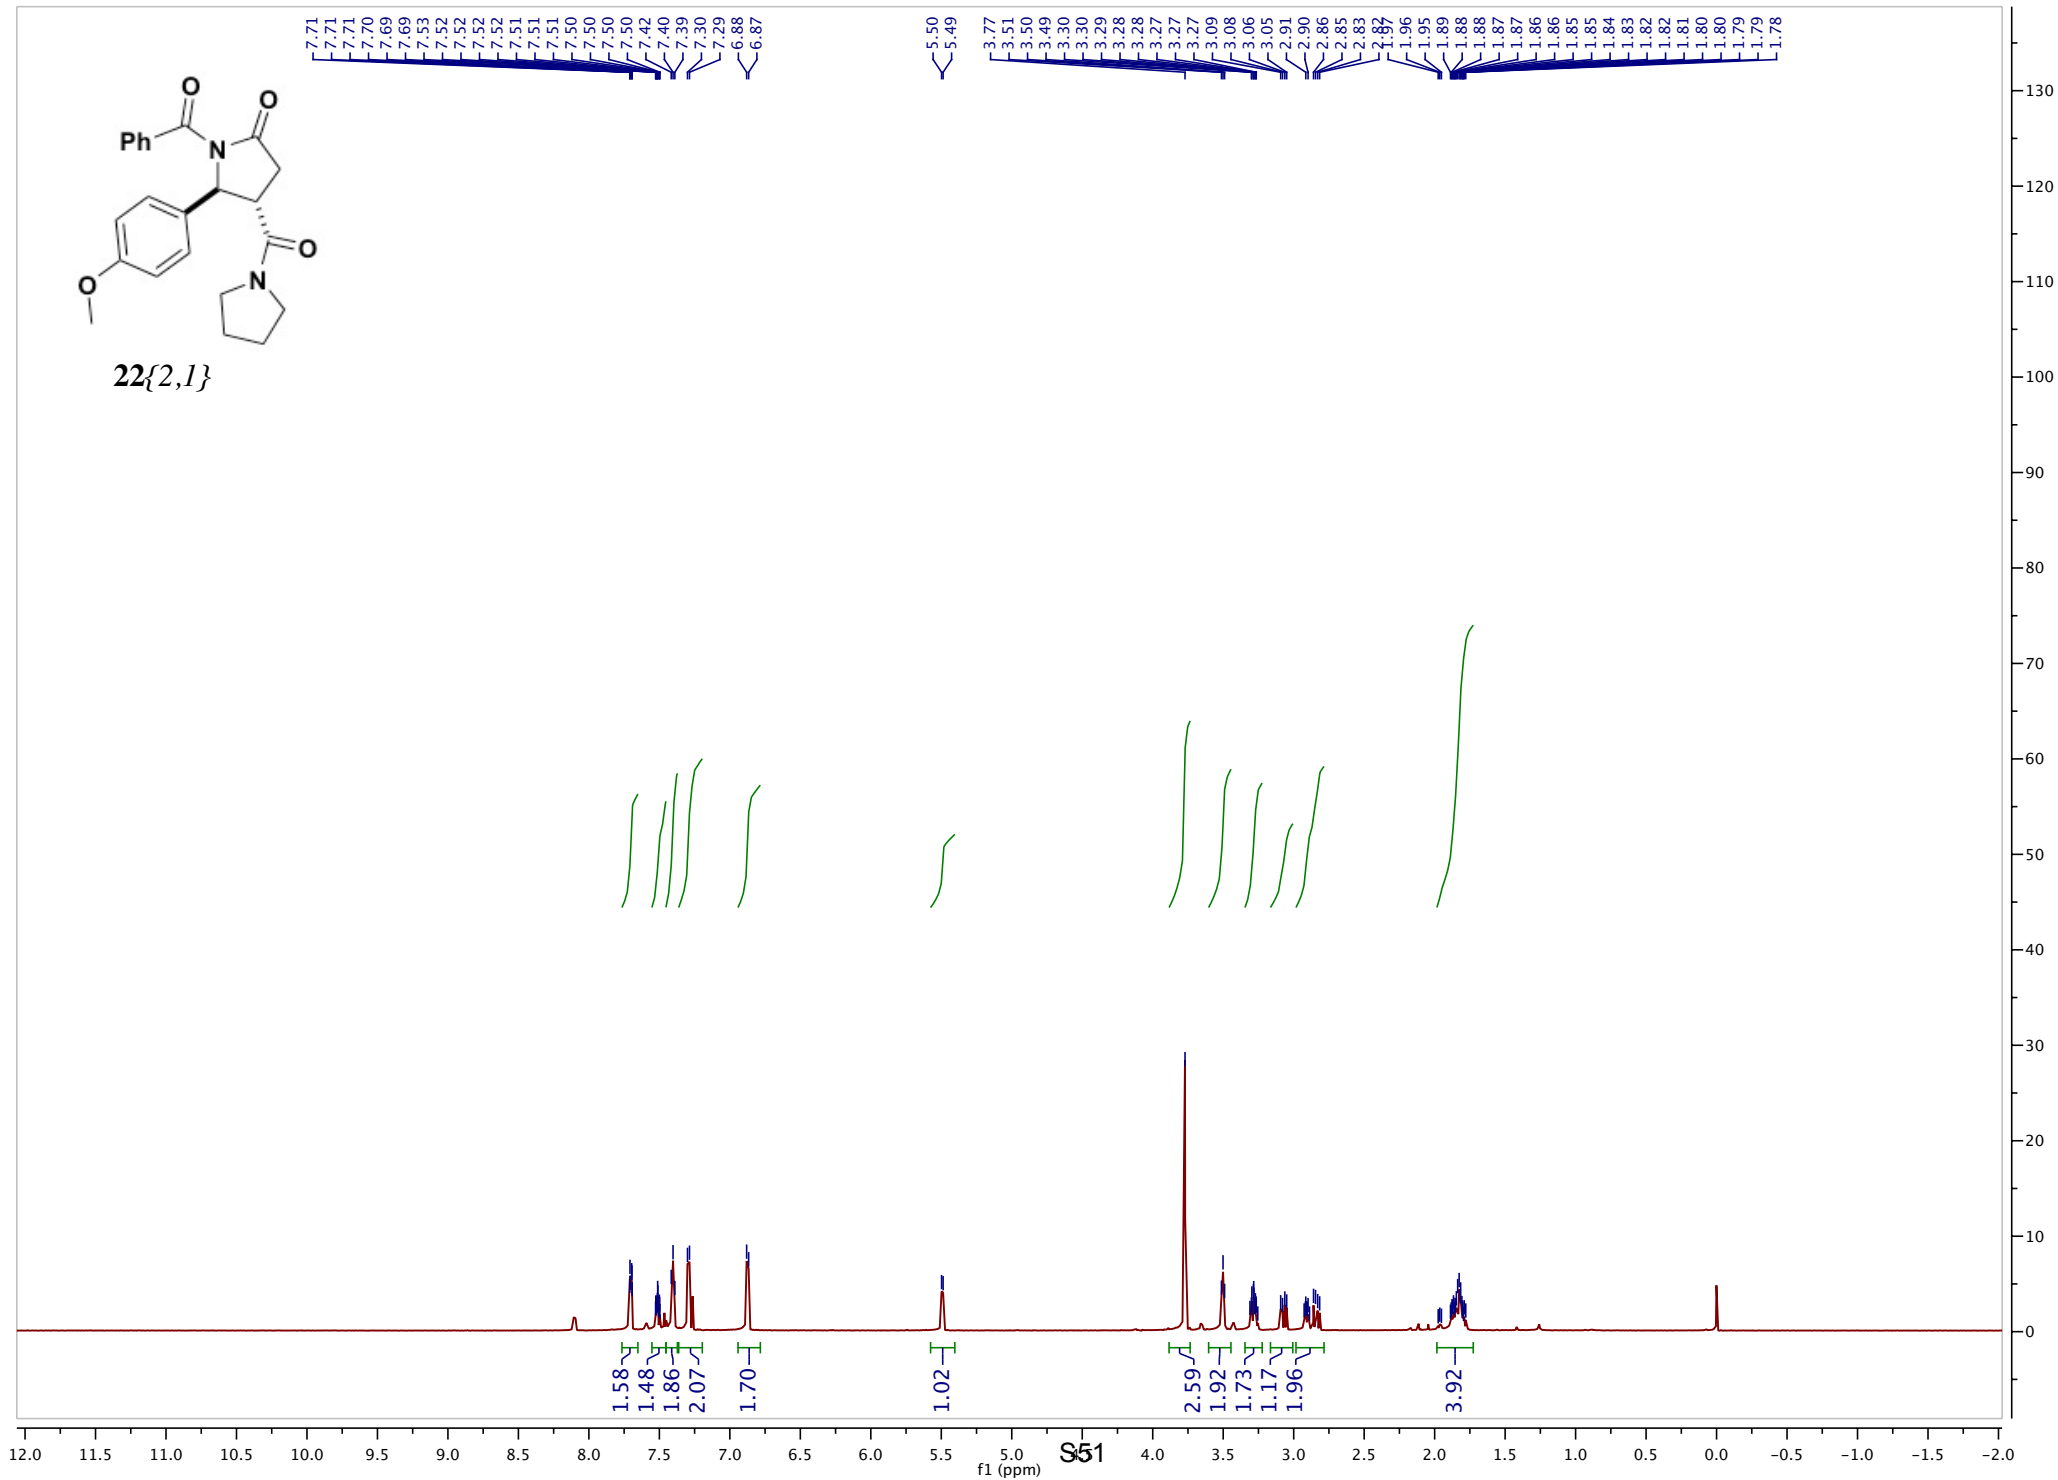

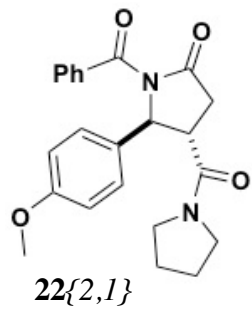

173.26  
170.02  
169.21

159.40

134.24  
133.38  
132.39  
130.07  
129.36  
128.38  
127.90  
126.89

114.45

64.48

55.28

46.56  
46.28  
45.17

35.58

25.97  
24.17

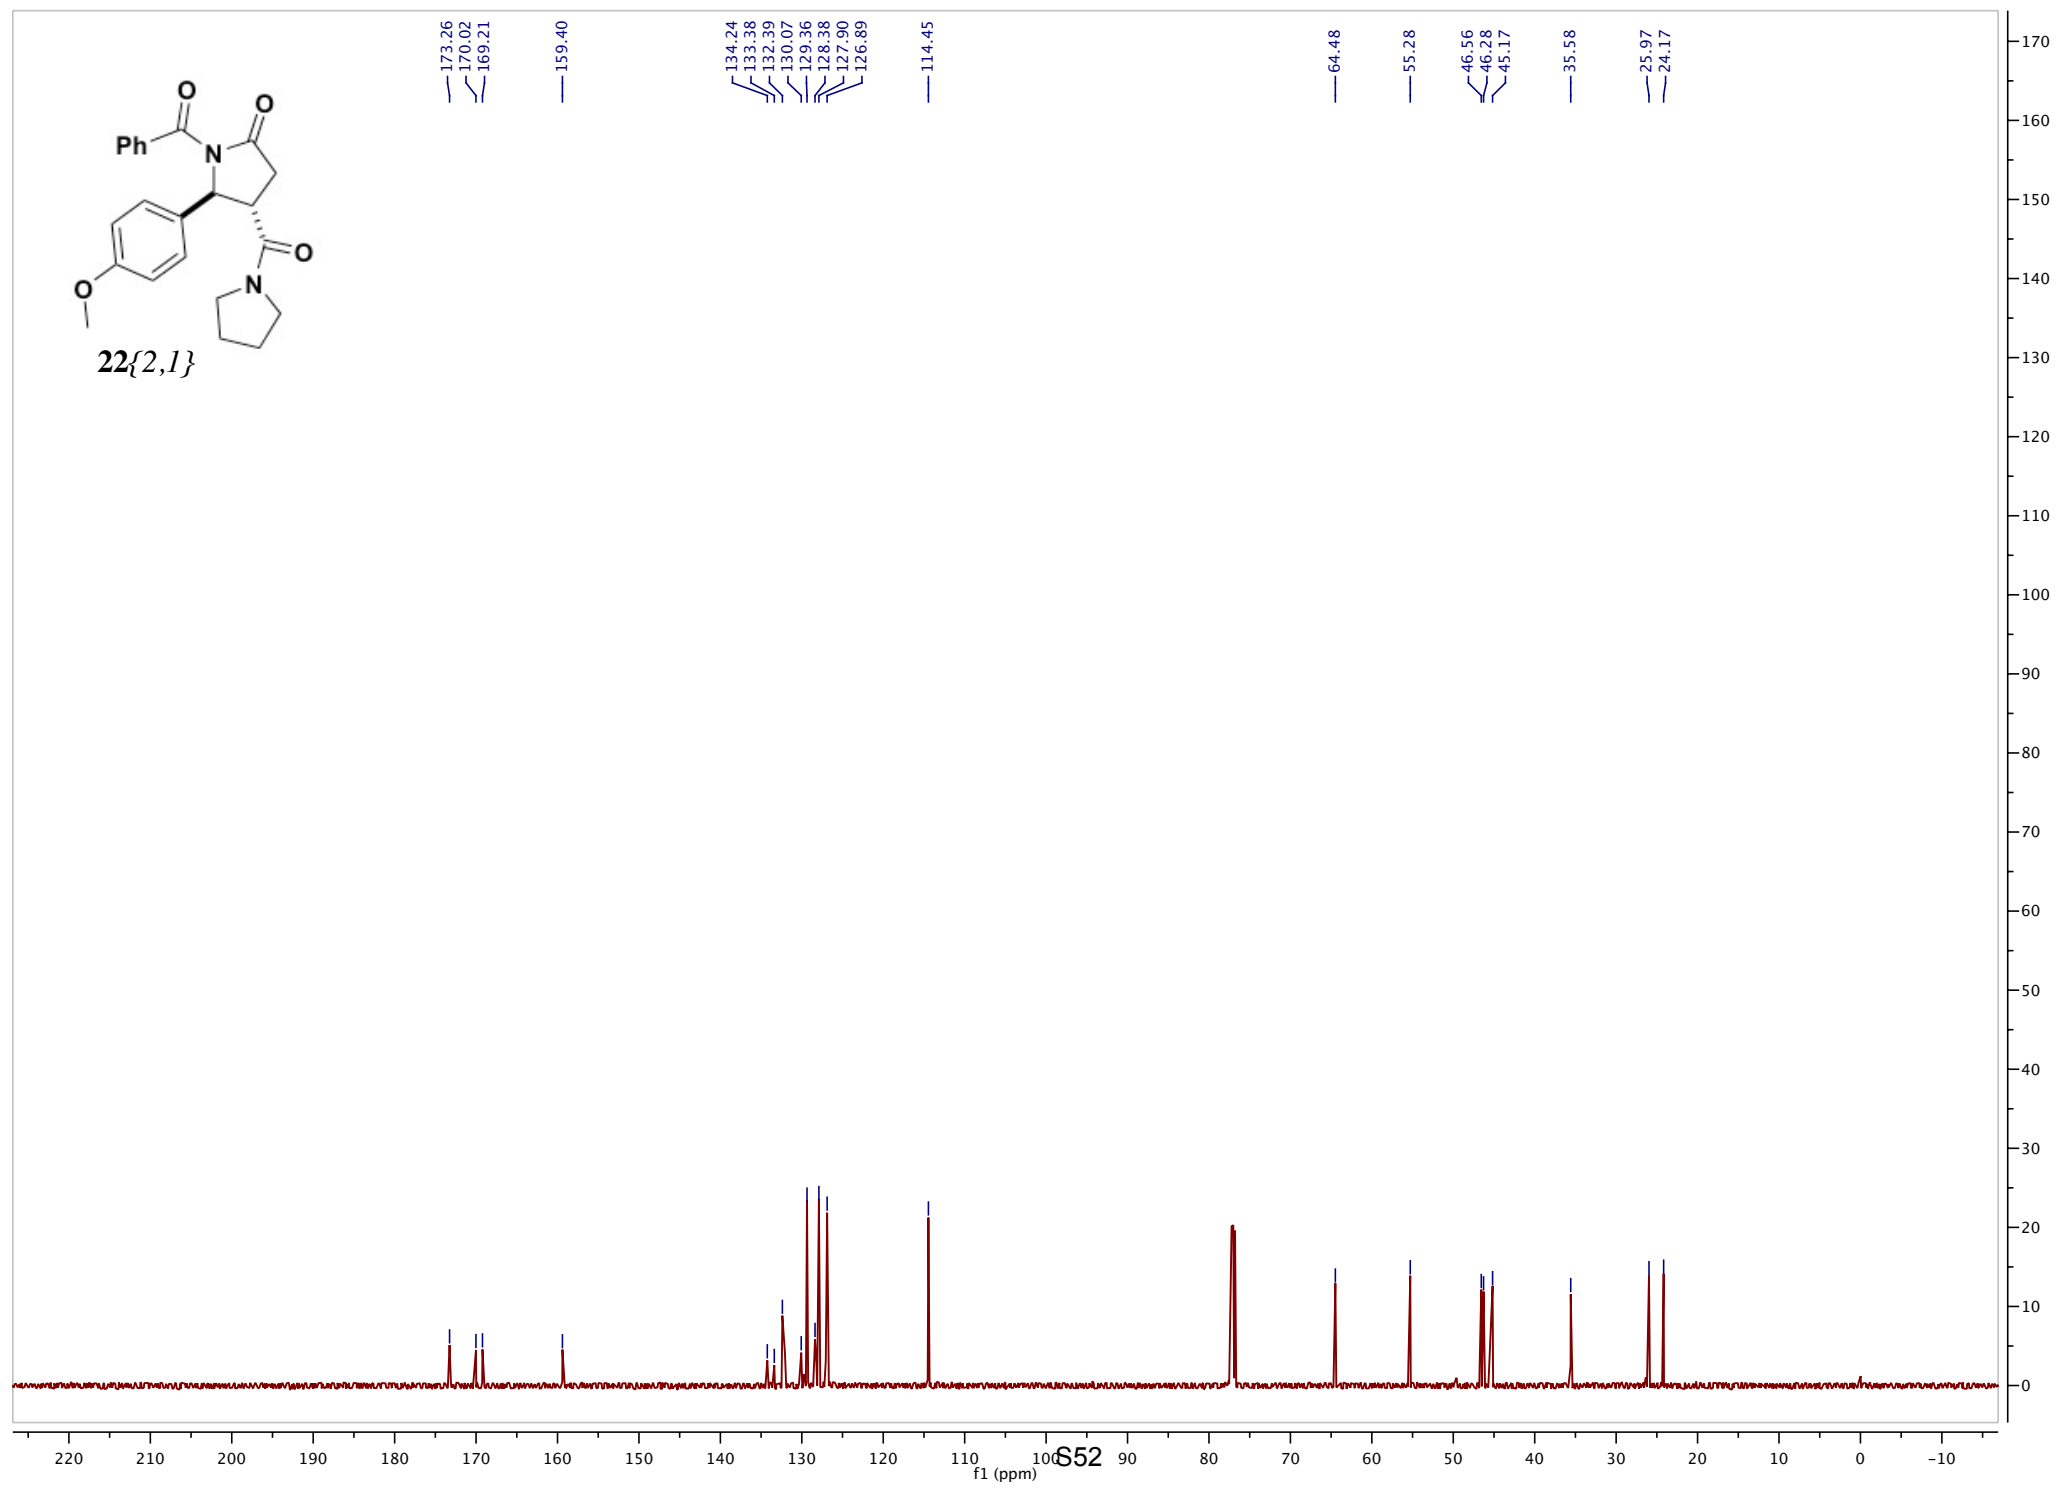

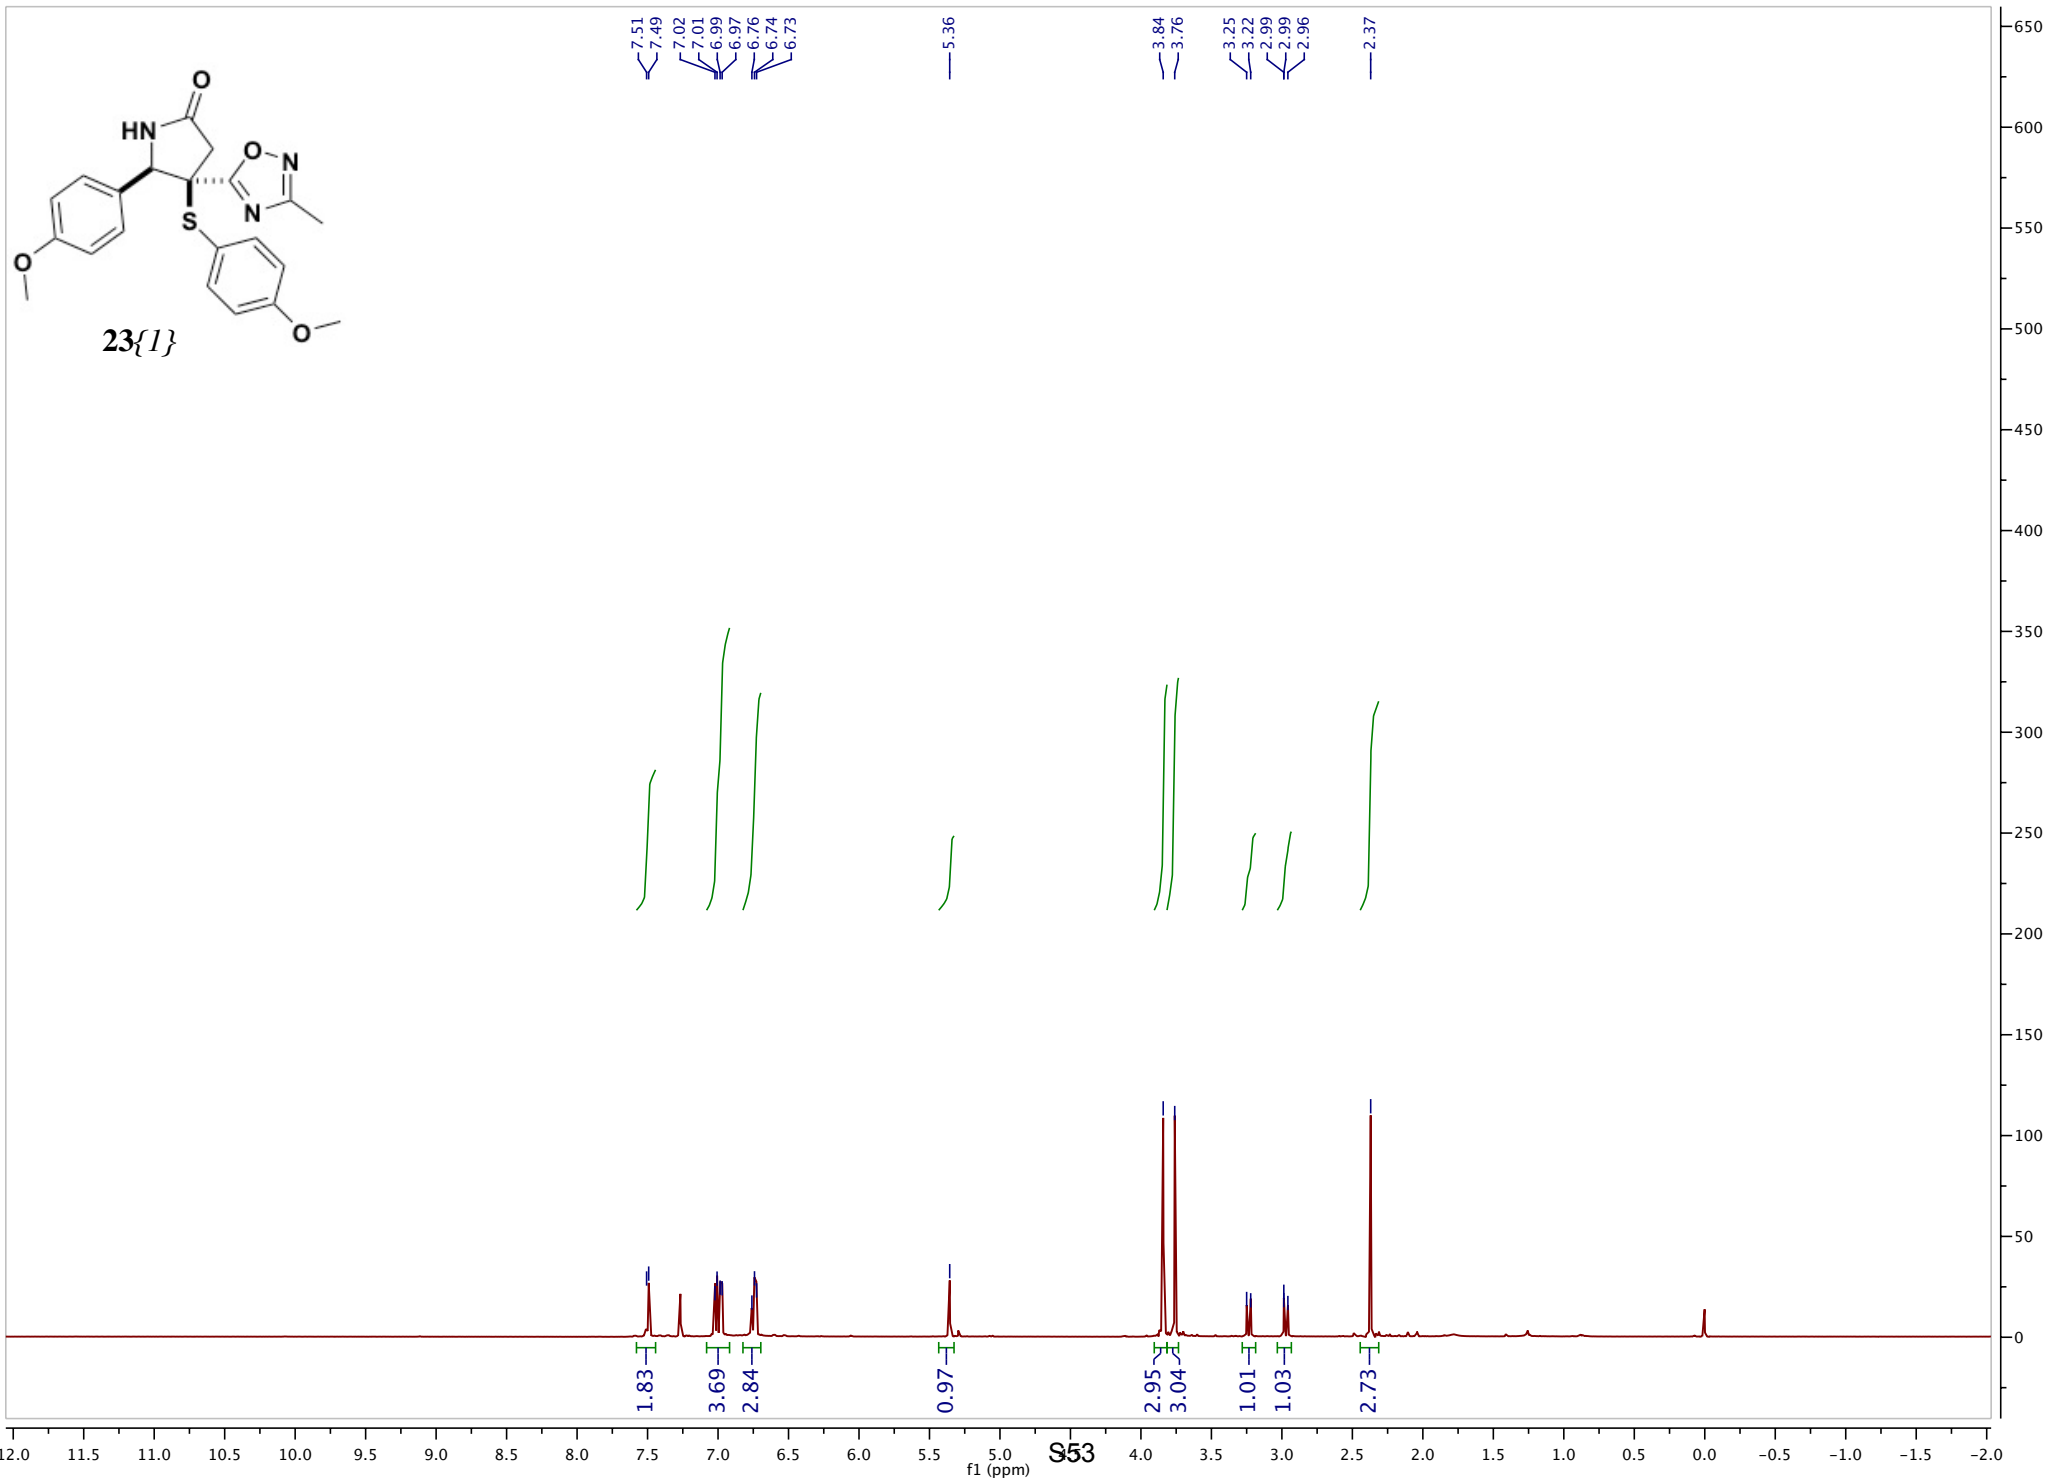

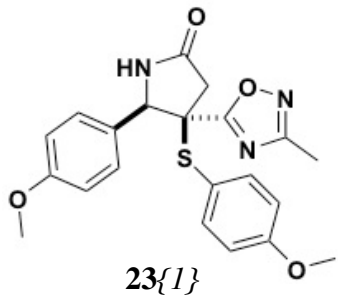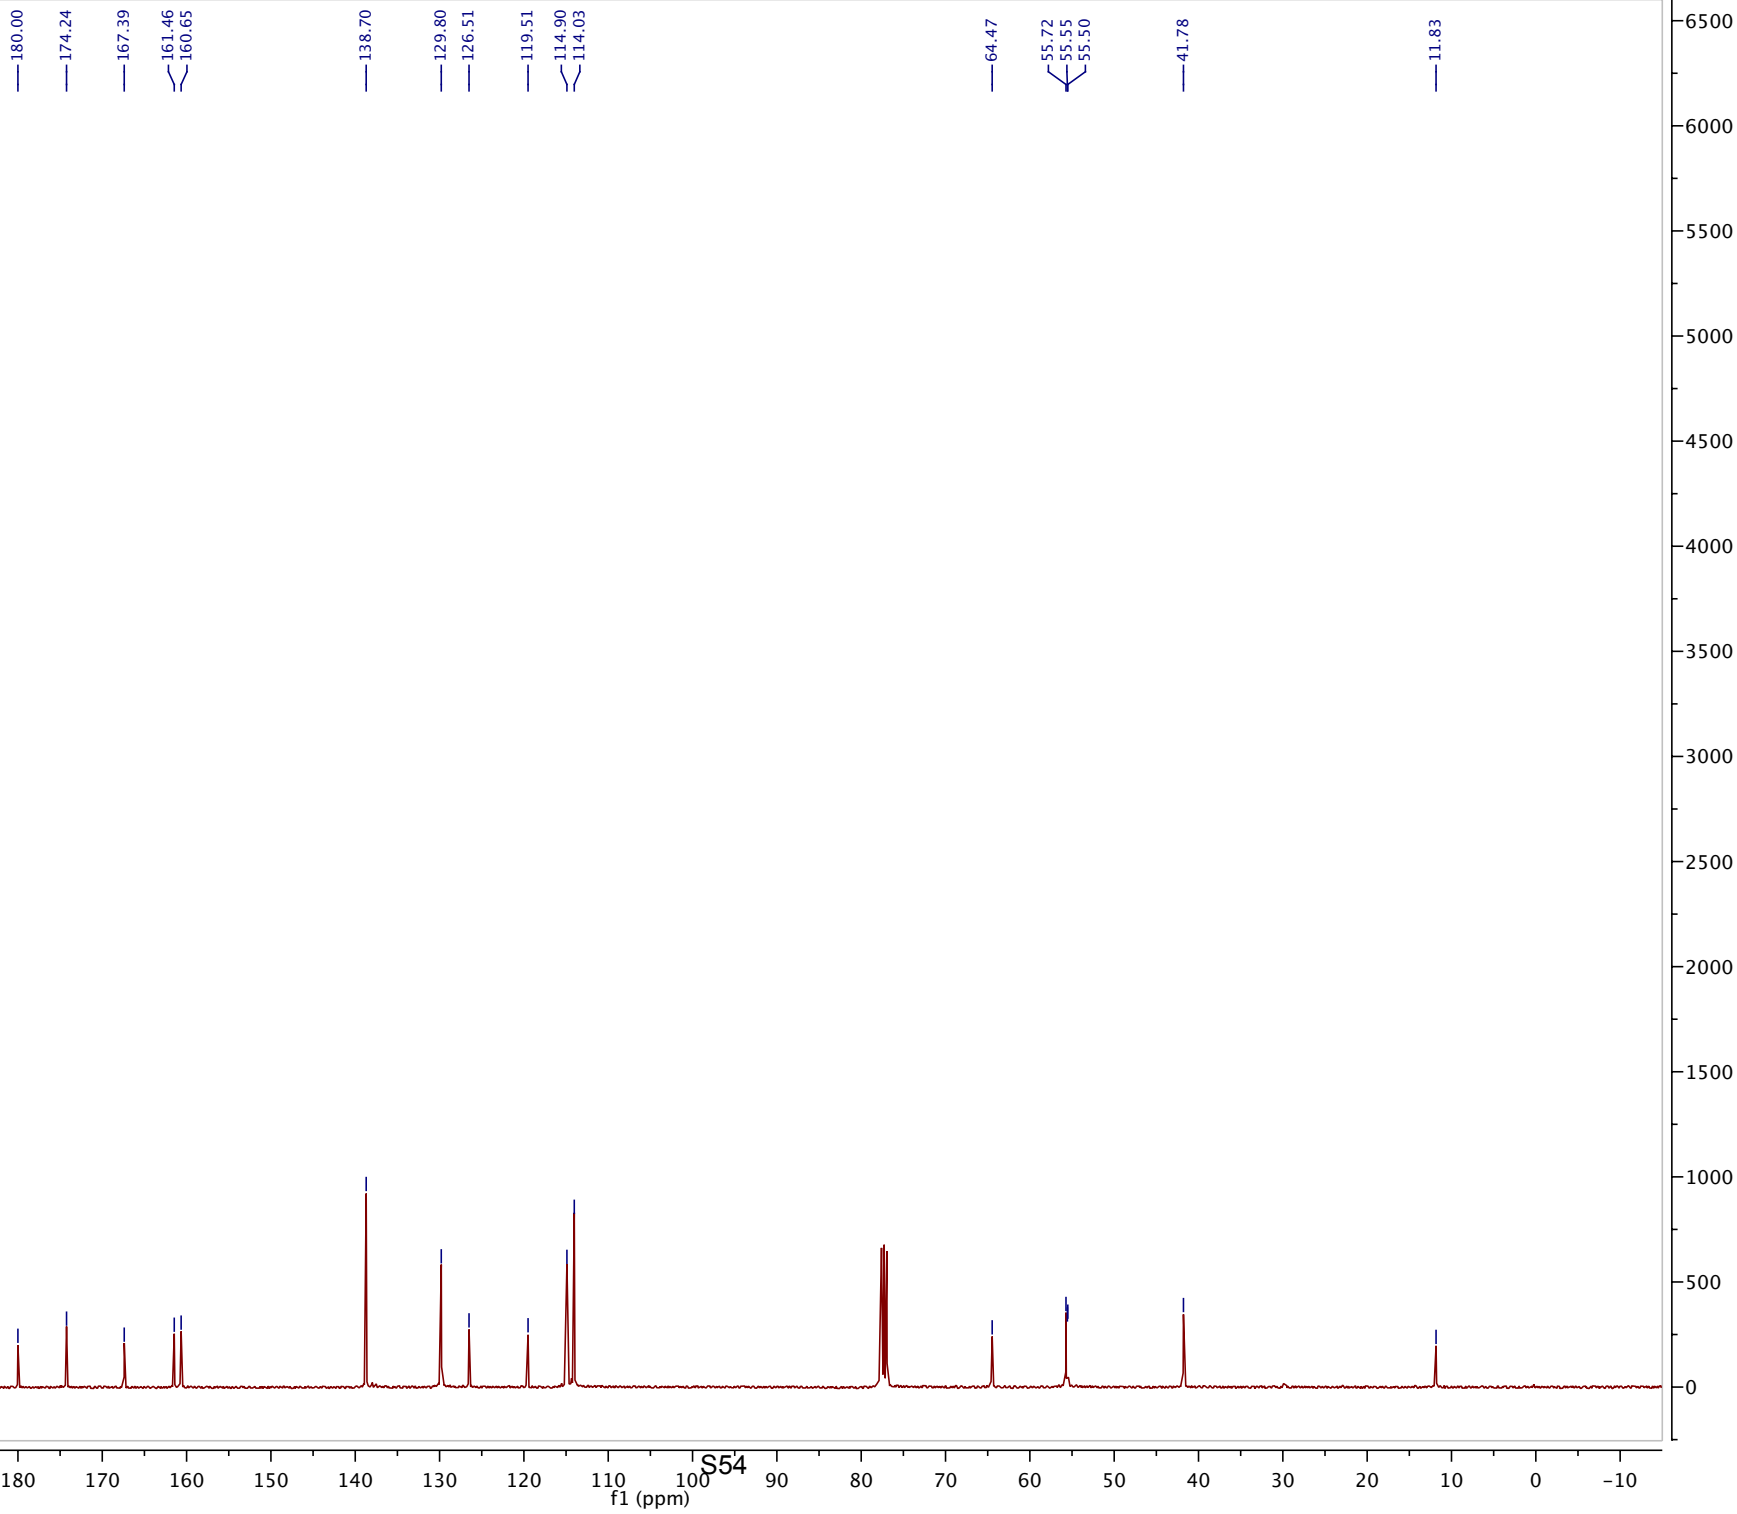

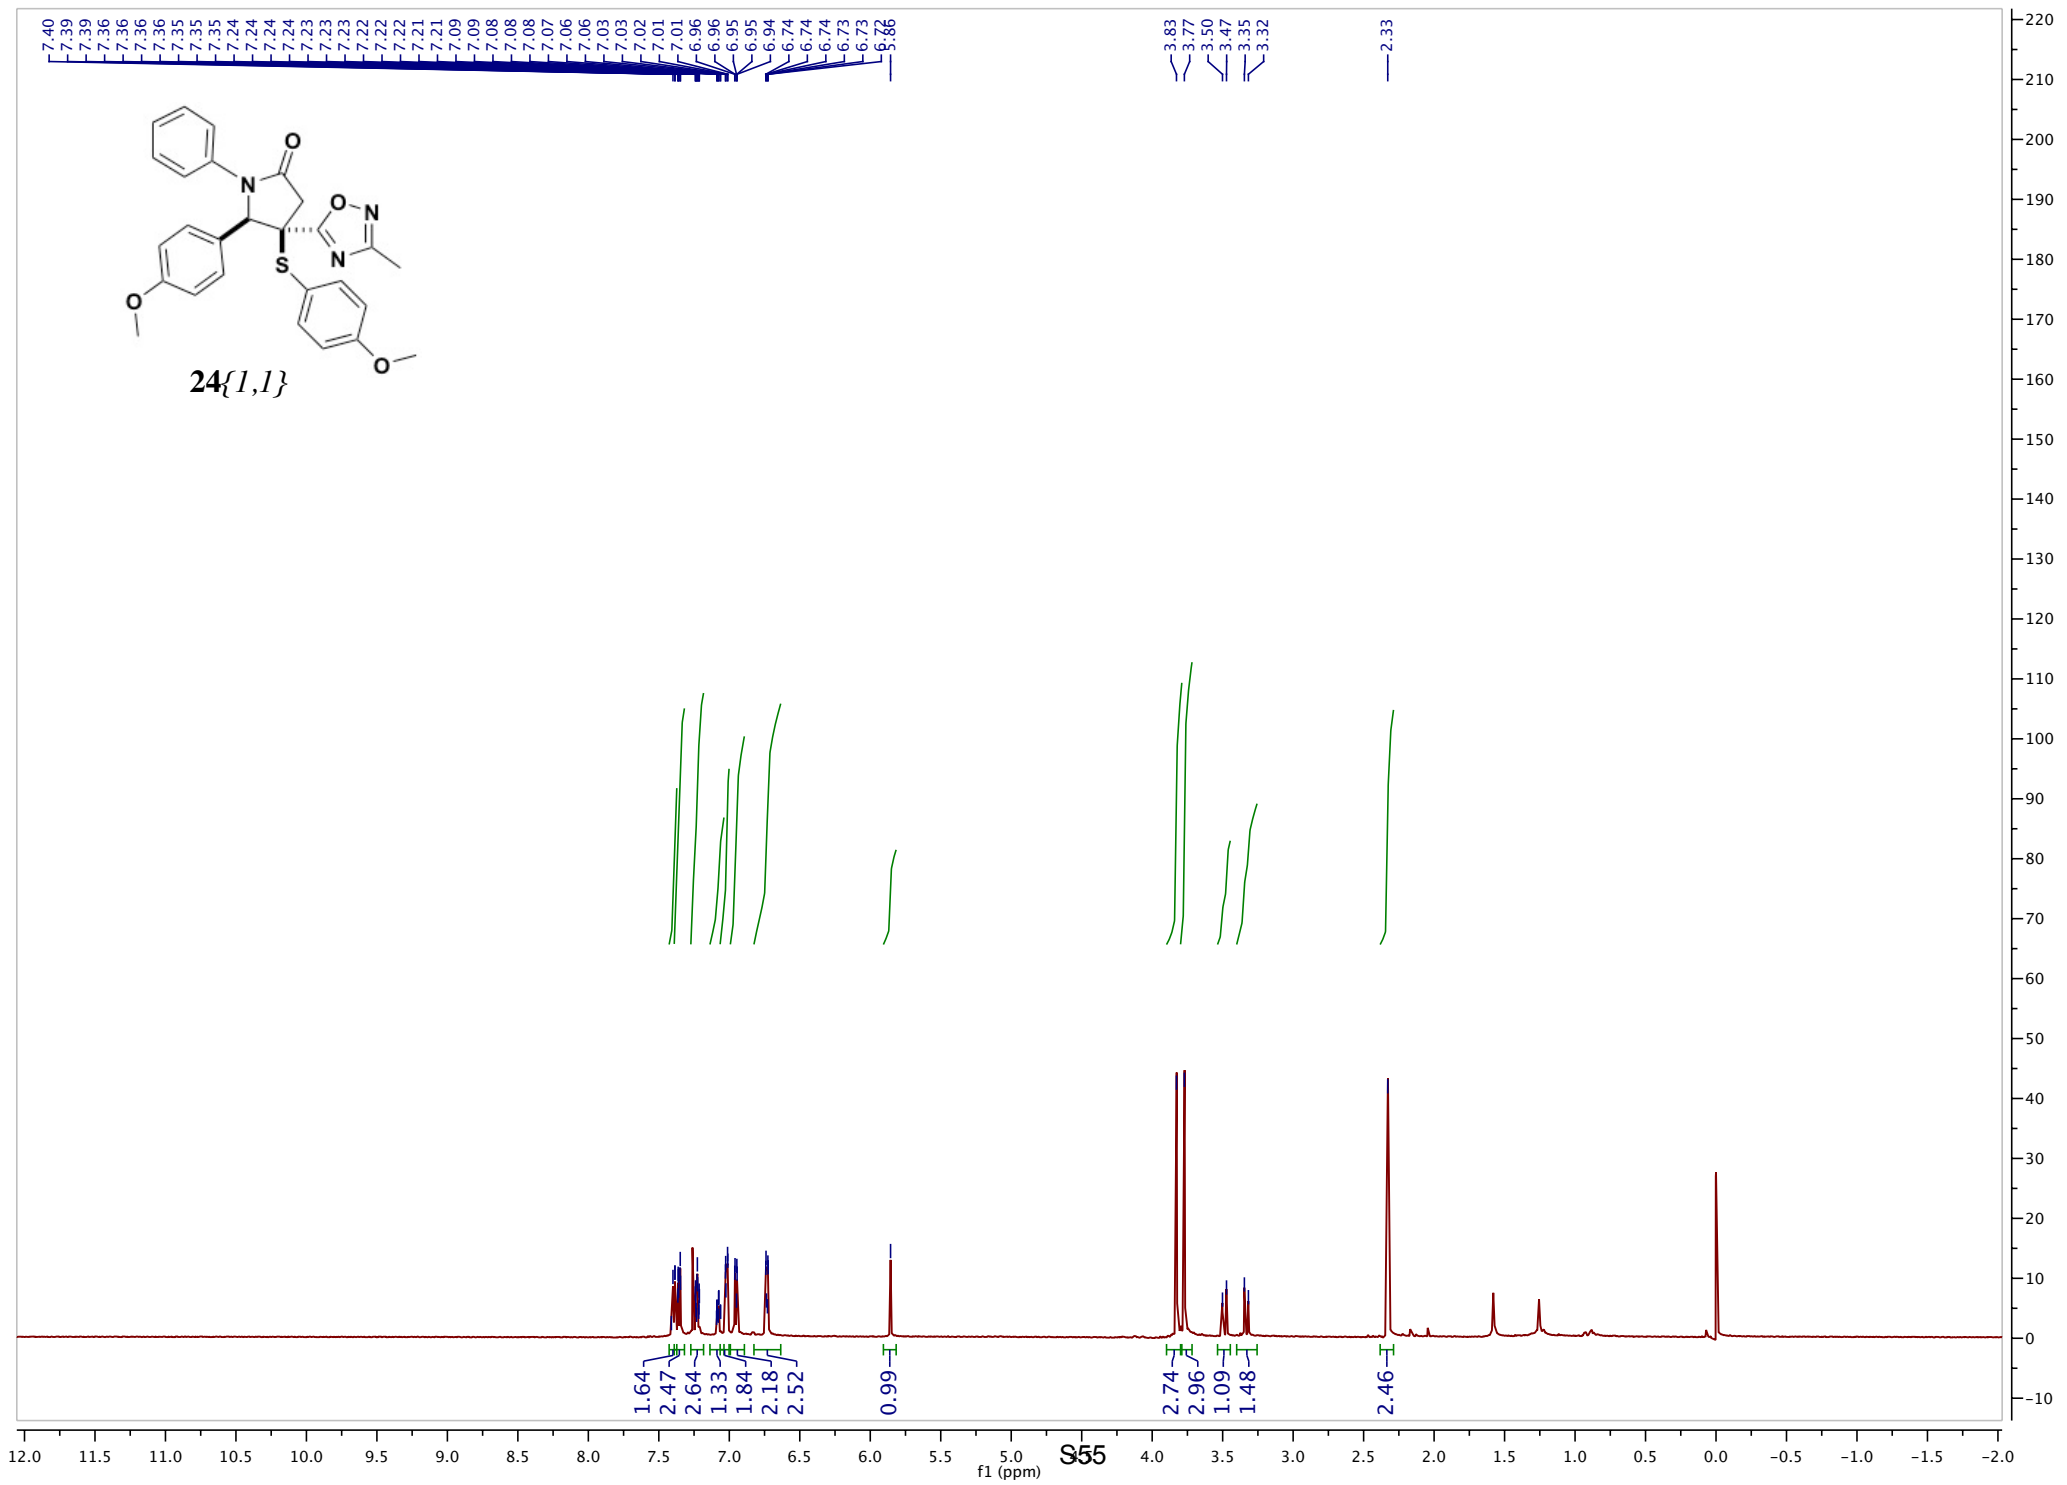

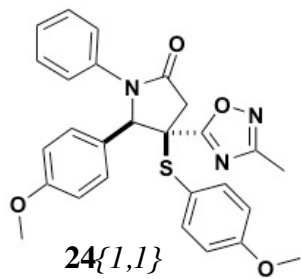

179.85

170.29

167.20

161.24

160.34

137.97

137.40

129.44

128.79

125.92

125.53

122.16

119.18

114.61

114.12

70.37

55.29

55.25

53.62

42.83

11.56

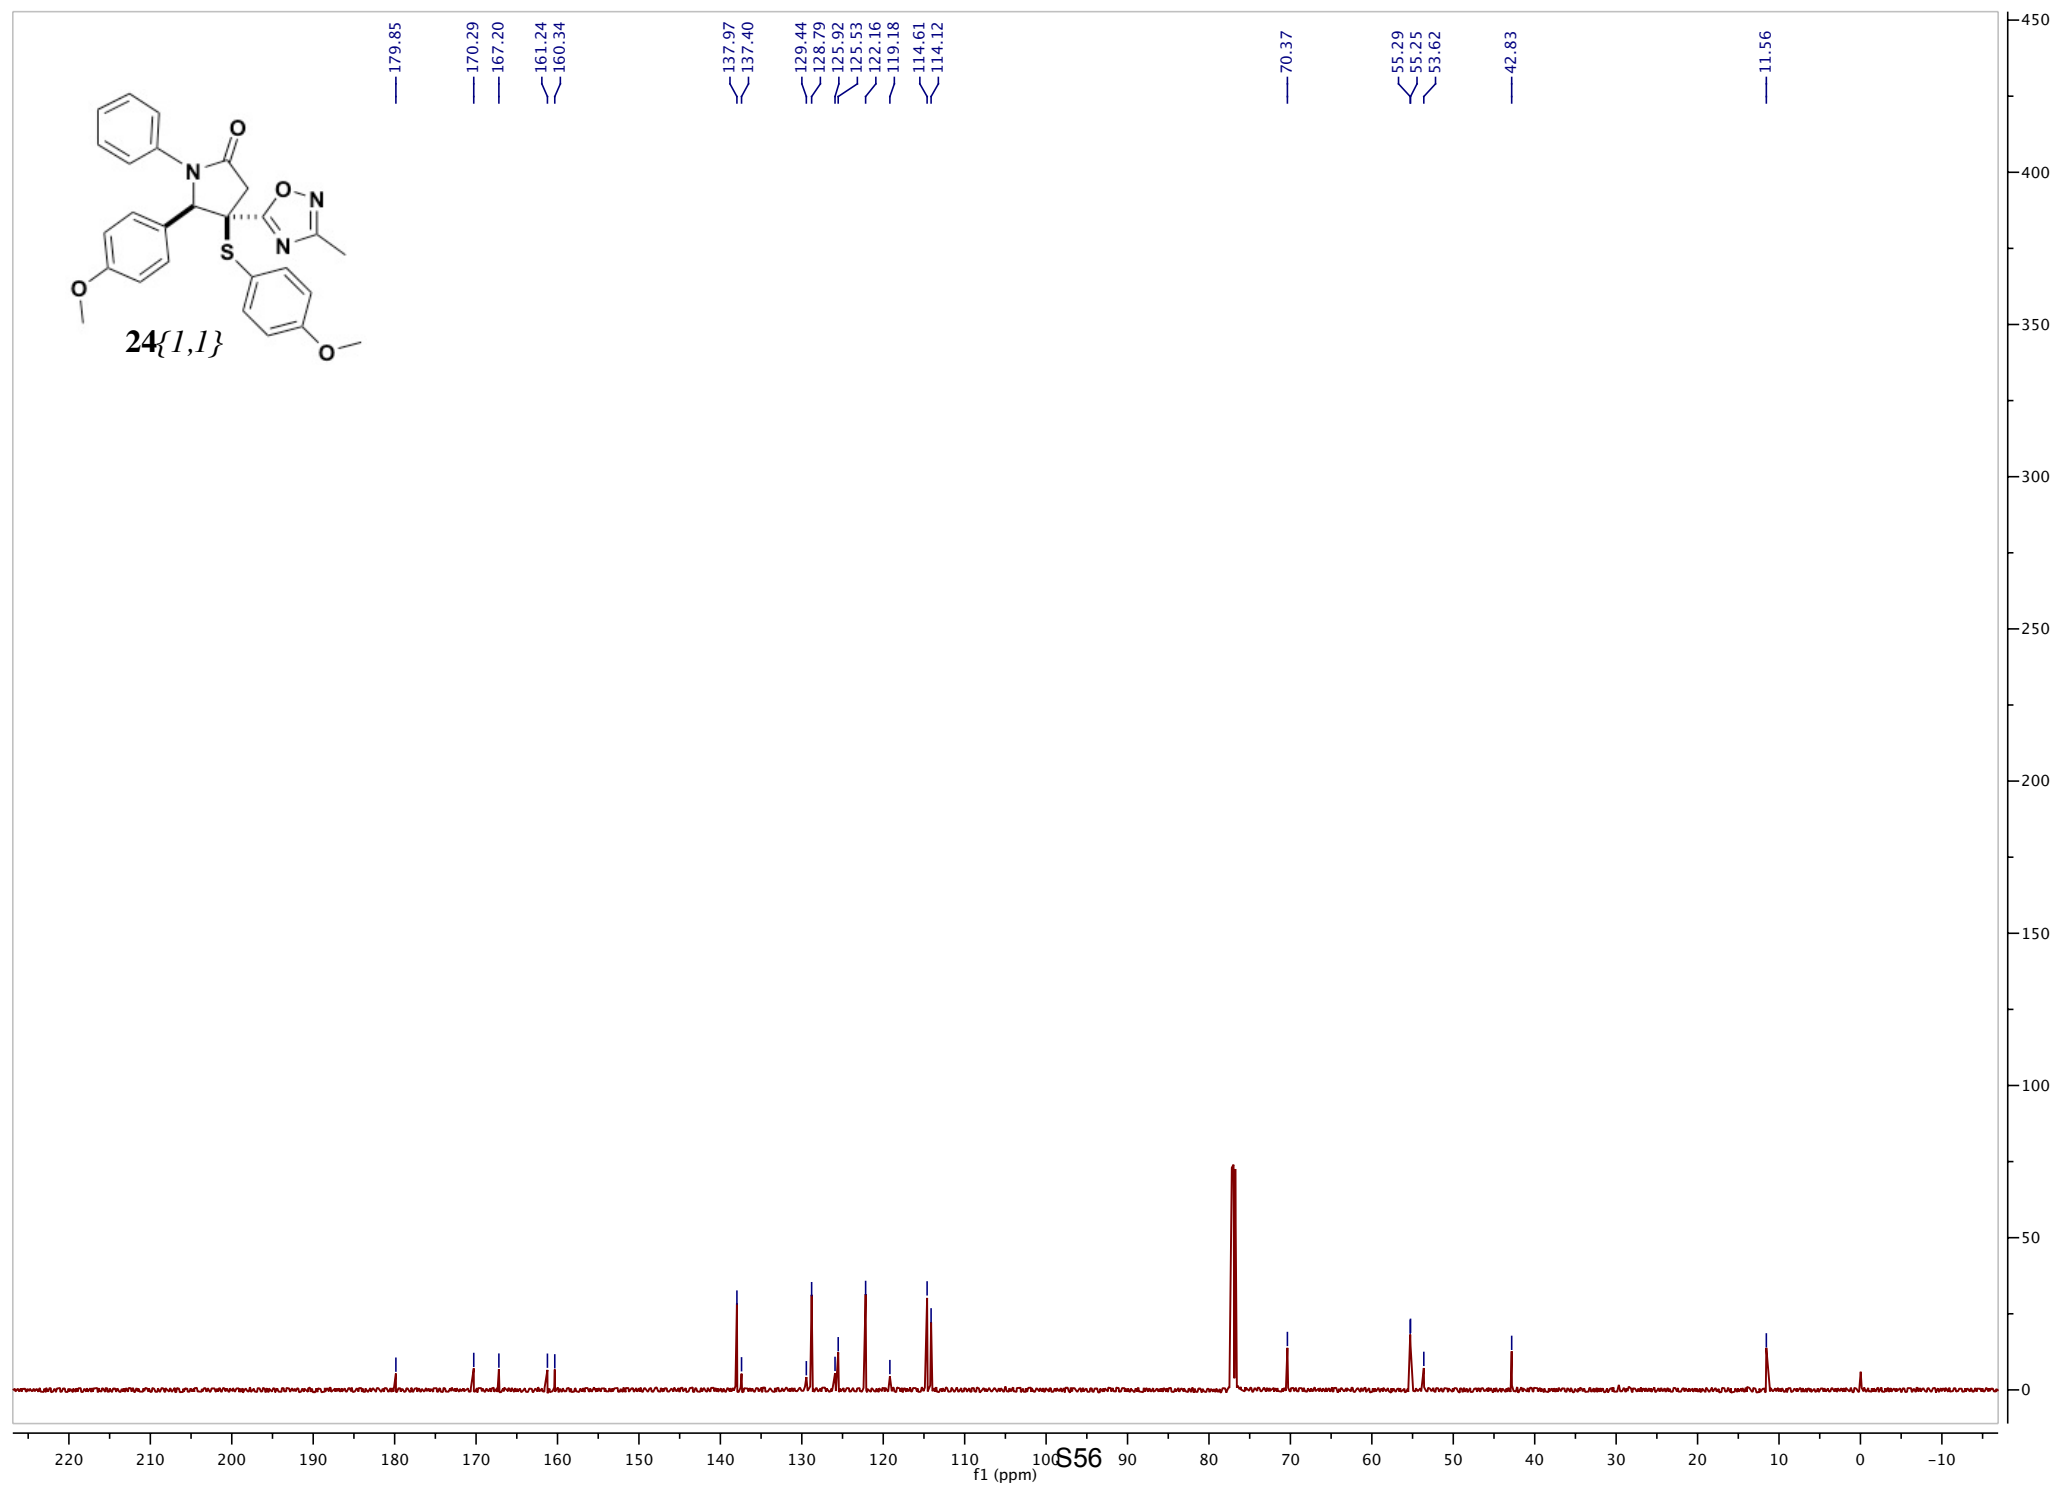



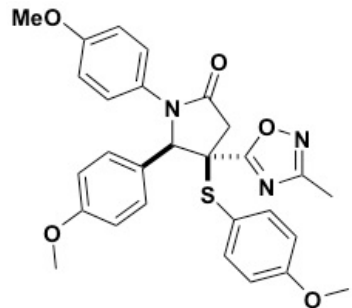

24{1,3}

7.39  
7.37  
7.22  
7.20  
7.02  
7.01  
6.96  
6.94  
6.76  
6.74  
6.74  
6.72  
5.78  
5.78

3.83  
3.77  
3.71  
3.49  
3.46  
3.34  
3.34  
3.31

2.34

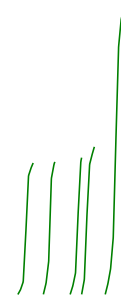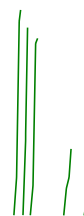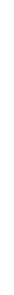

2.14  
2.15  
2.22  
2.40  
4.58

1.01

3.34  
3.05  
2.88  
1.08  
1.12

2.84

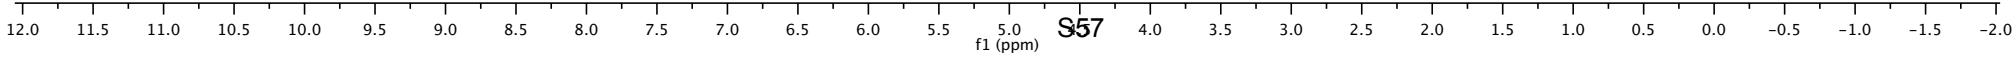

S57

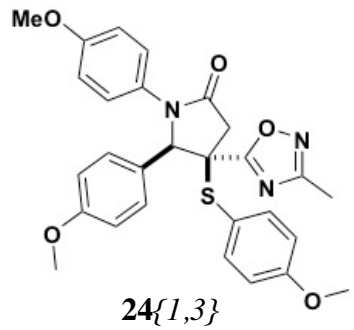

179.99

170.18

167.22

161.25

160.34

157.33

137.99

130.29

129.62

126.05

124.27

119.29

114.62

114.08

77.23 cdcl3

77.02 cdcl3

76.81 cdcl3

70.89

55.55

55.31

55.28

53.71

42.68

11.60

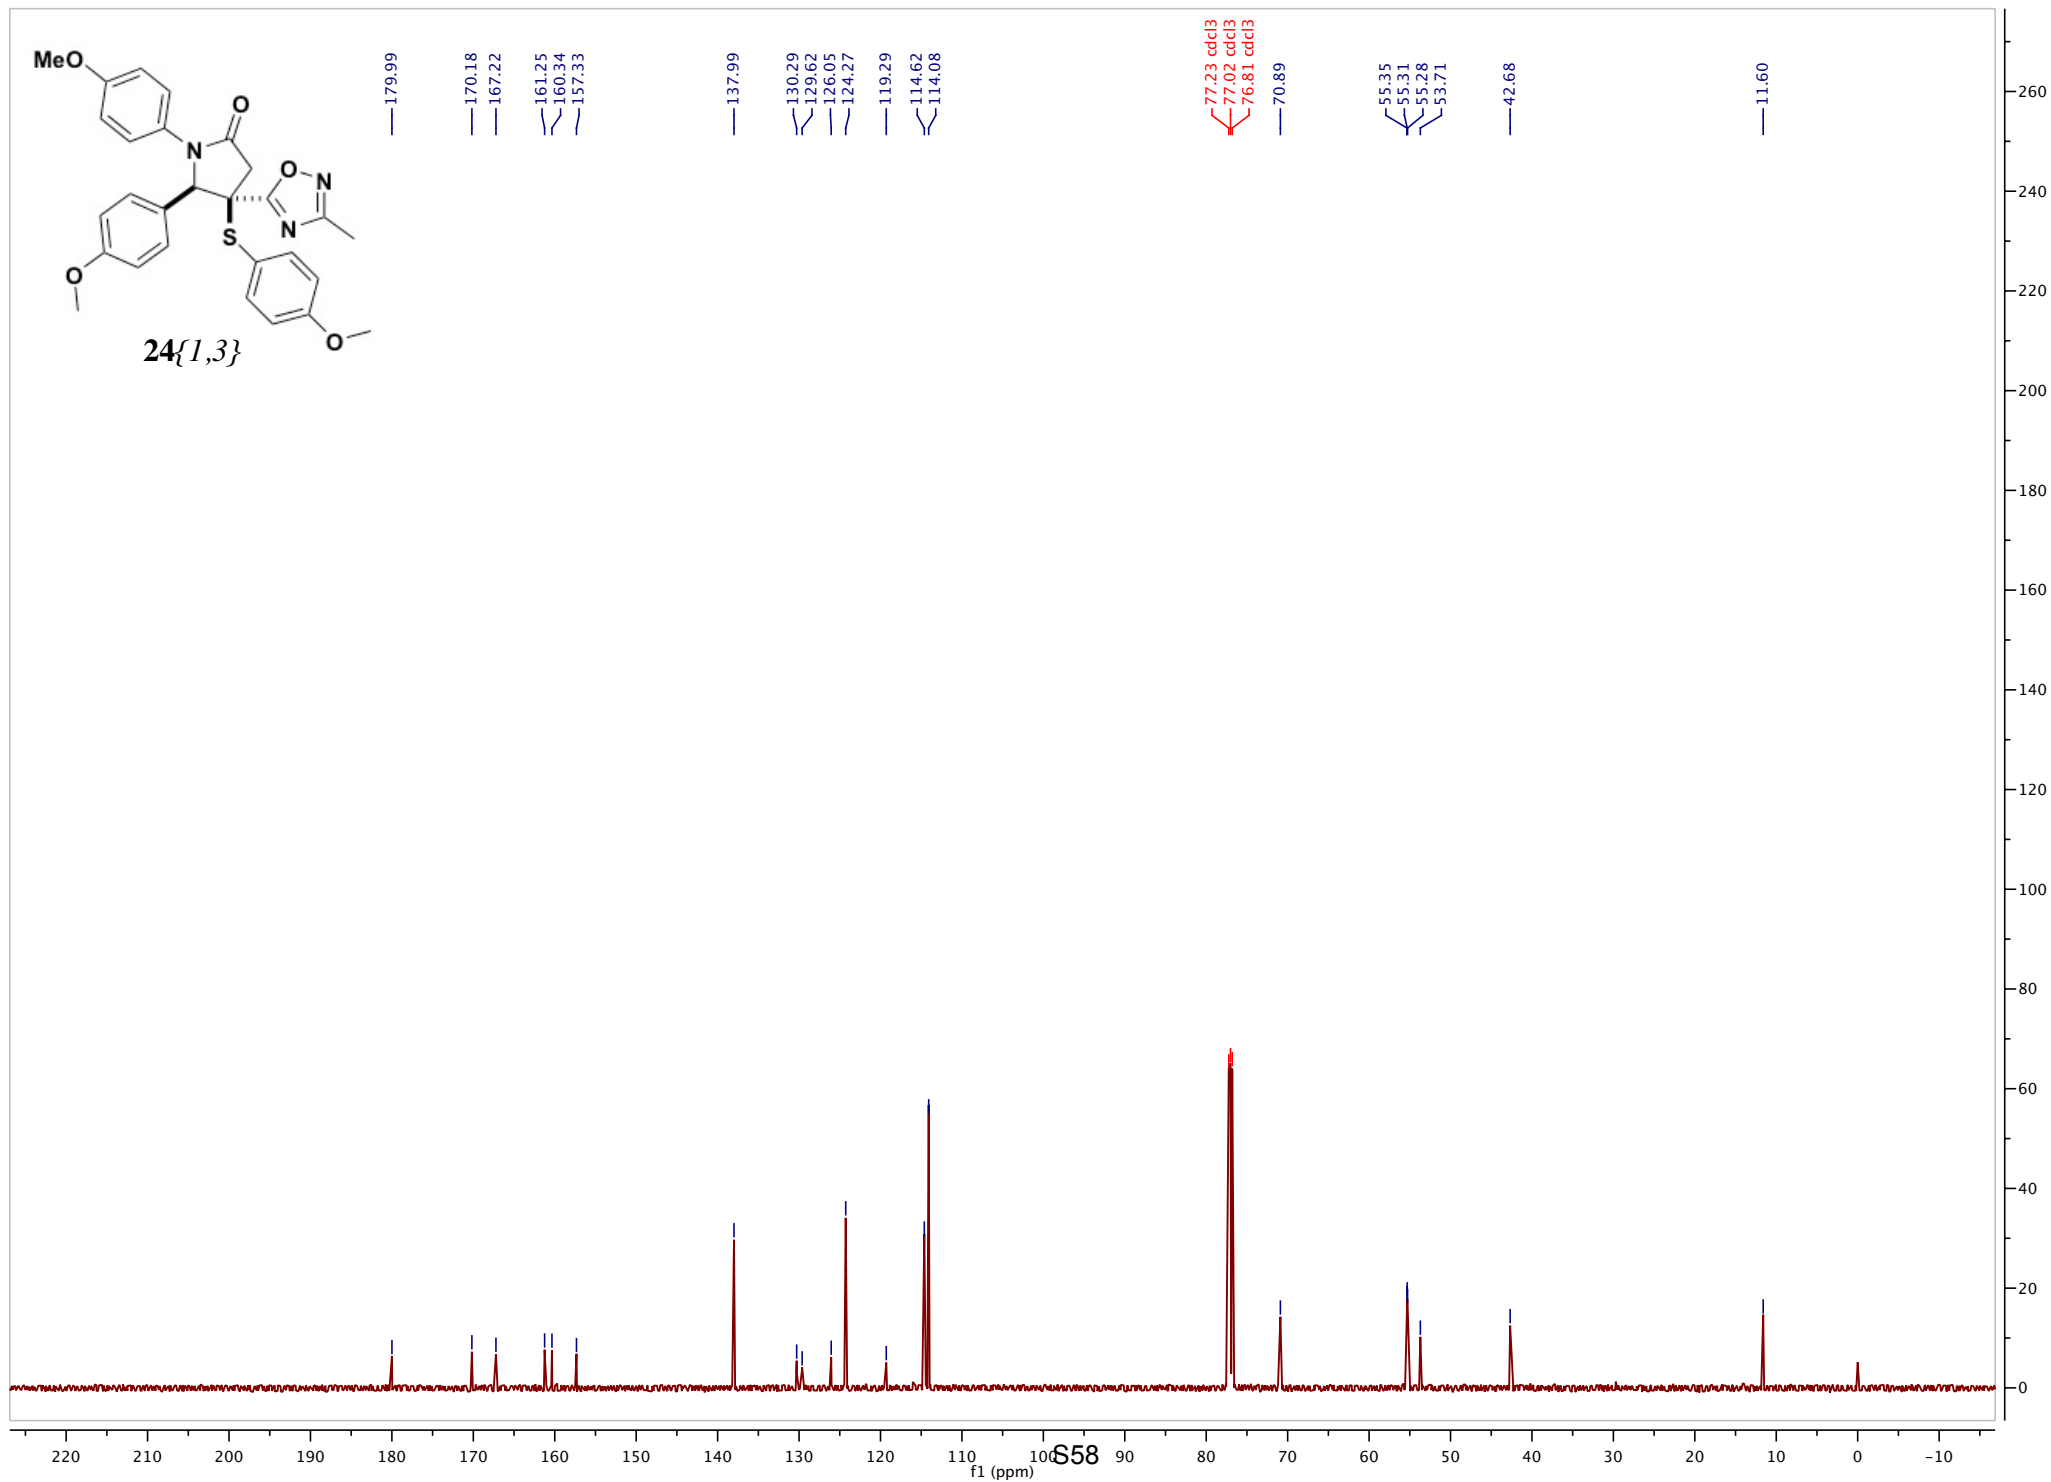

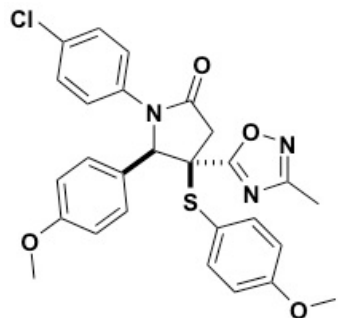

24{1,7}

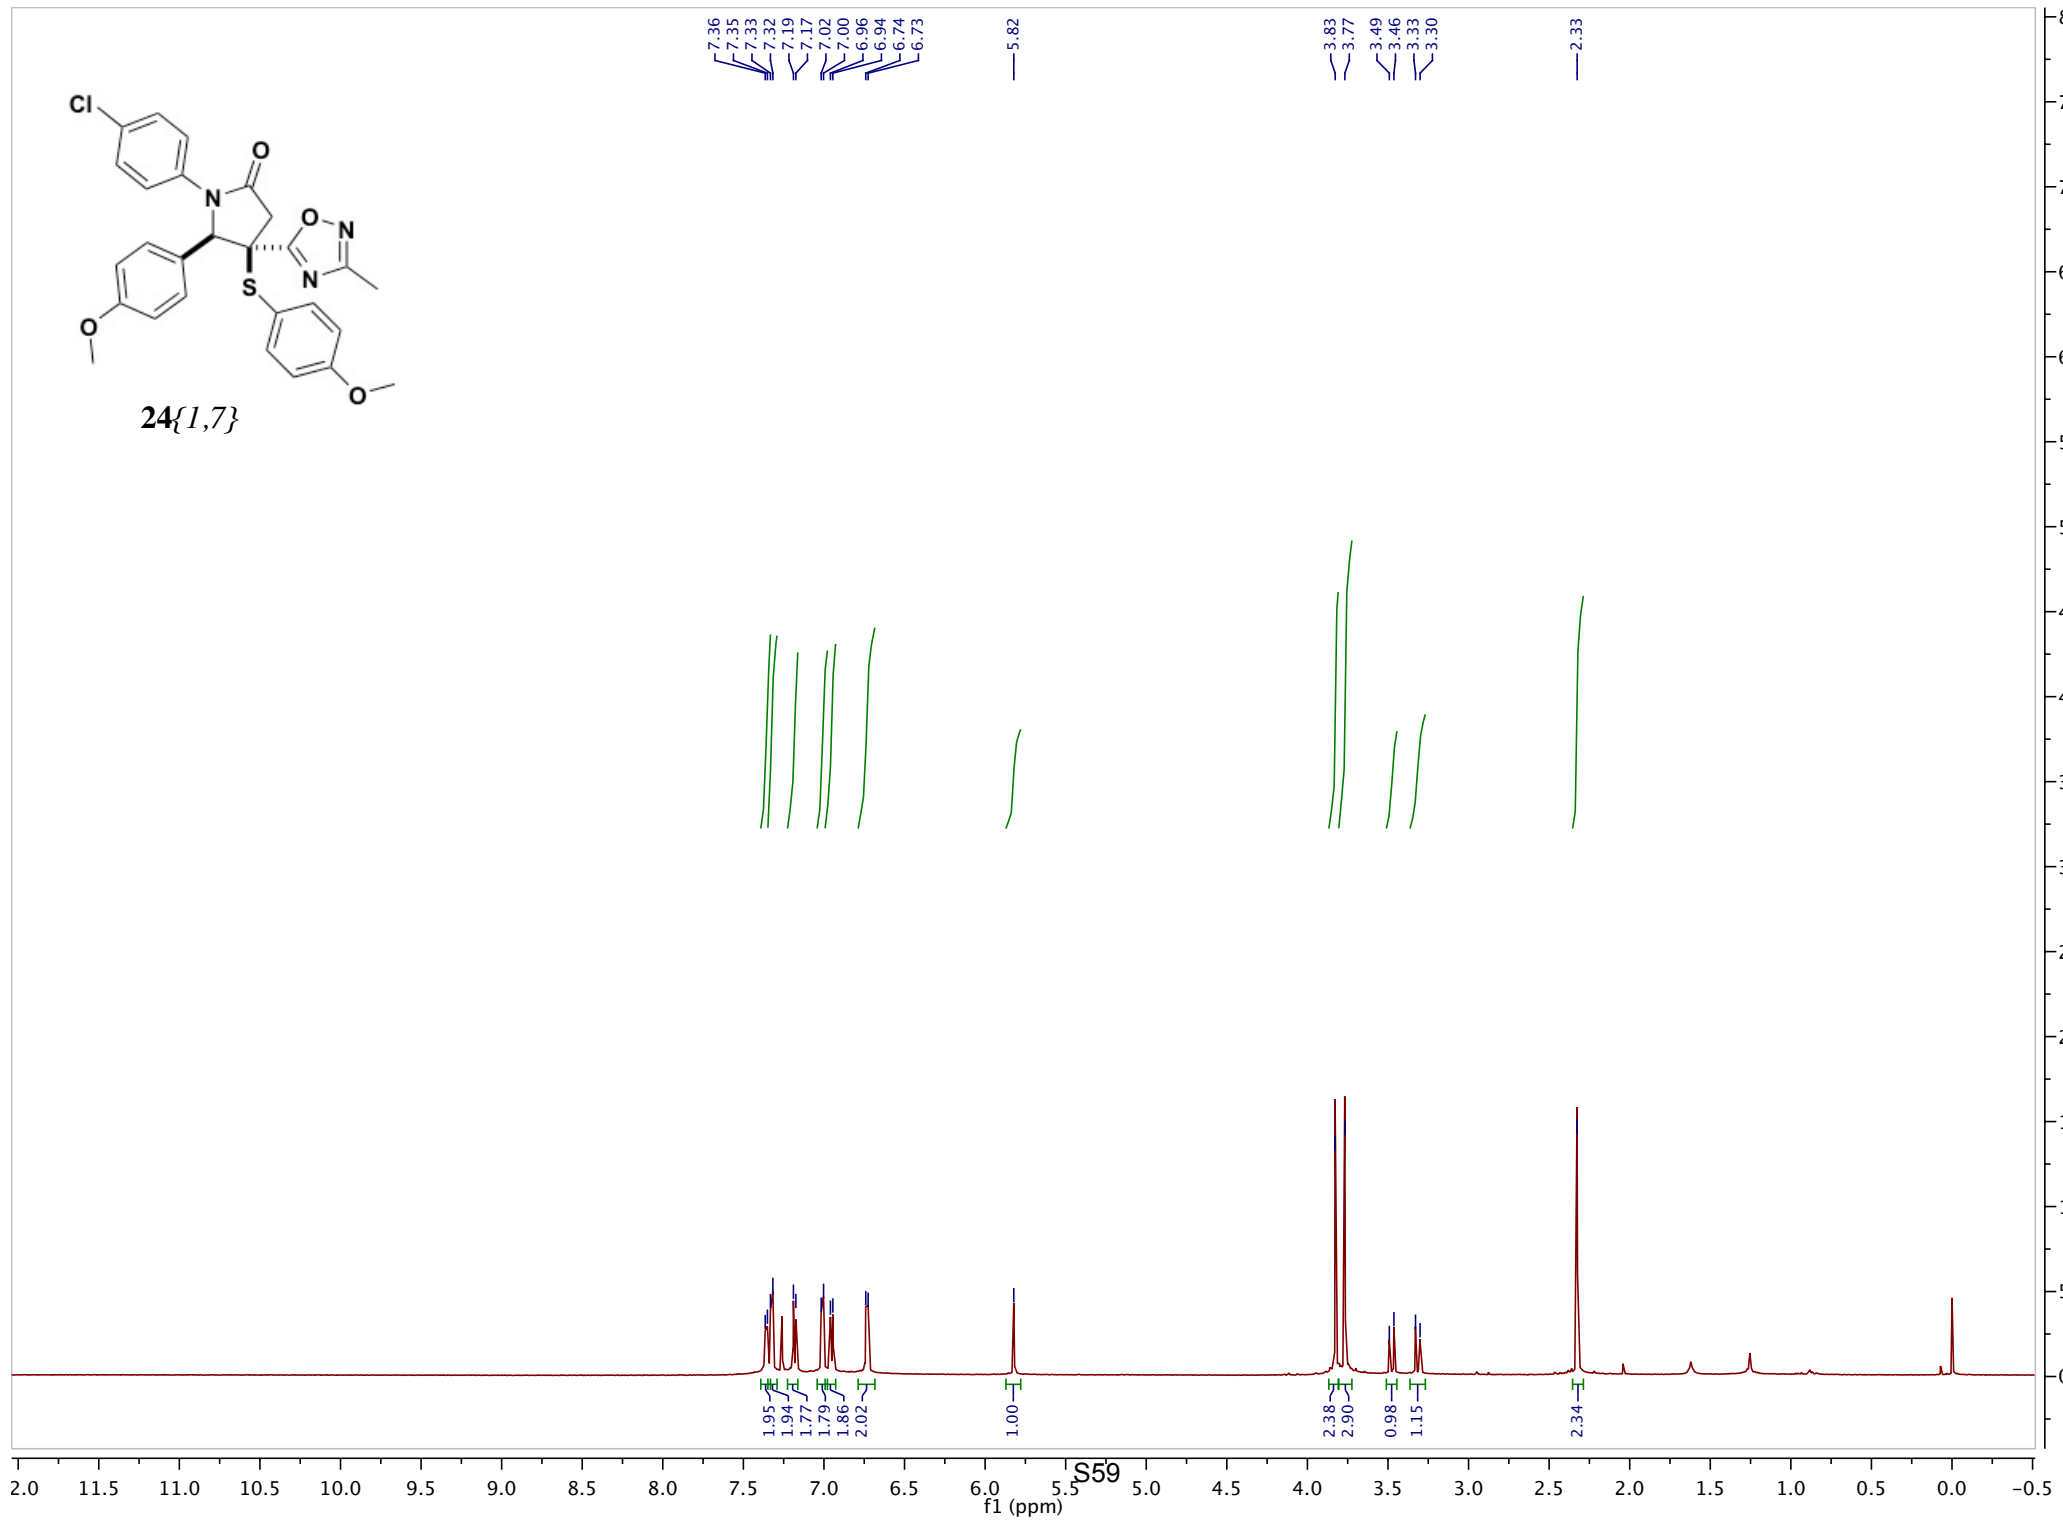

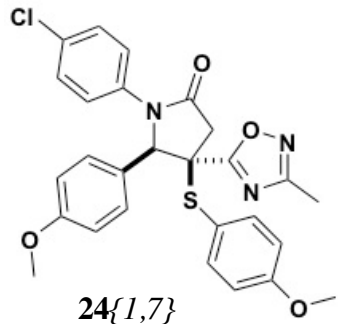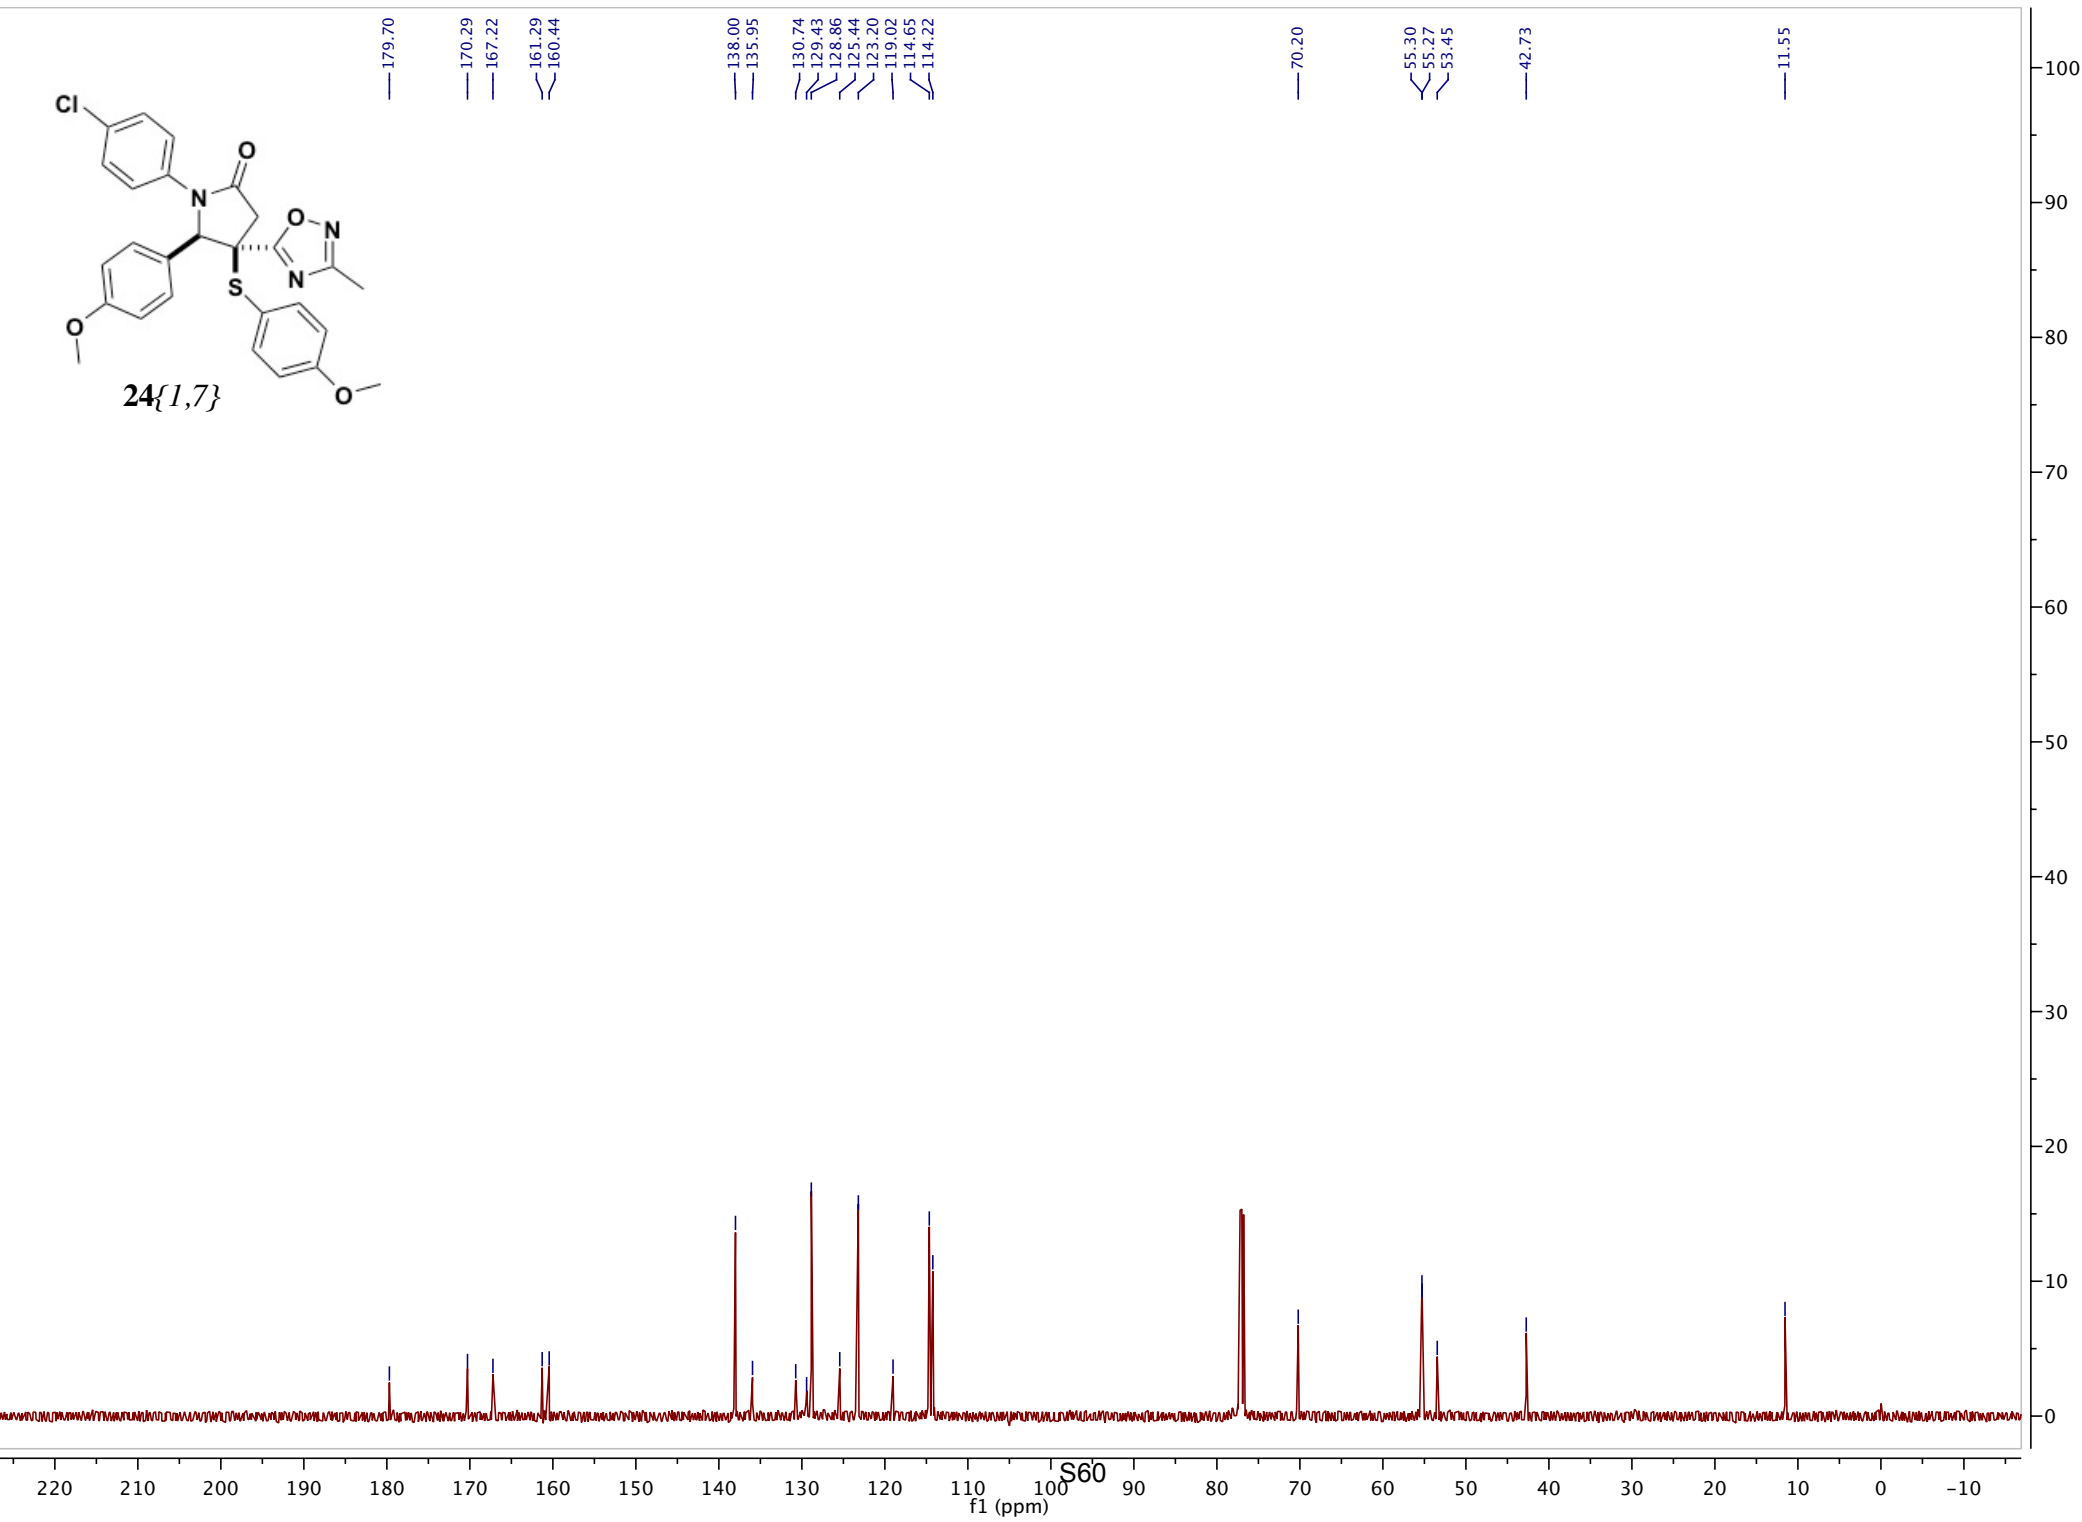

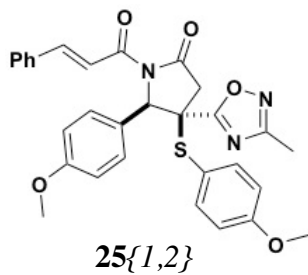

25{1,2}

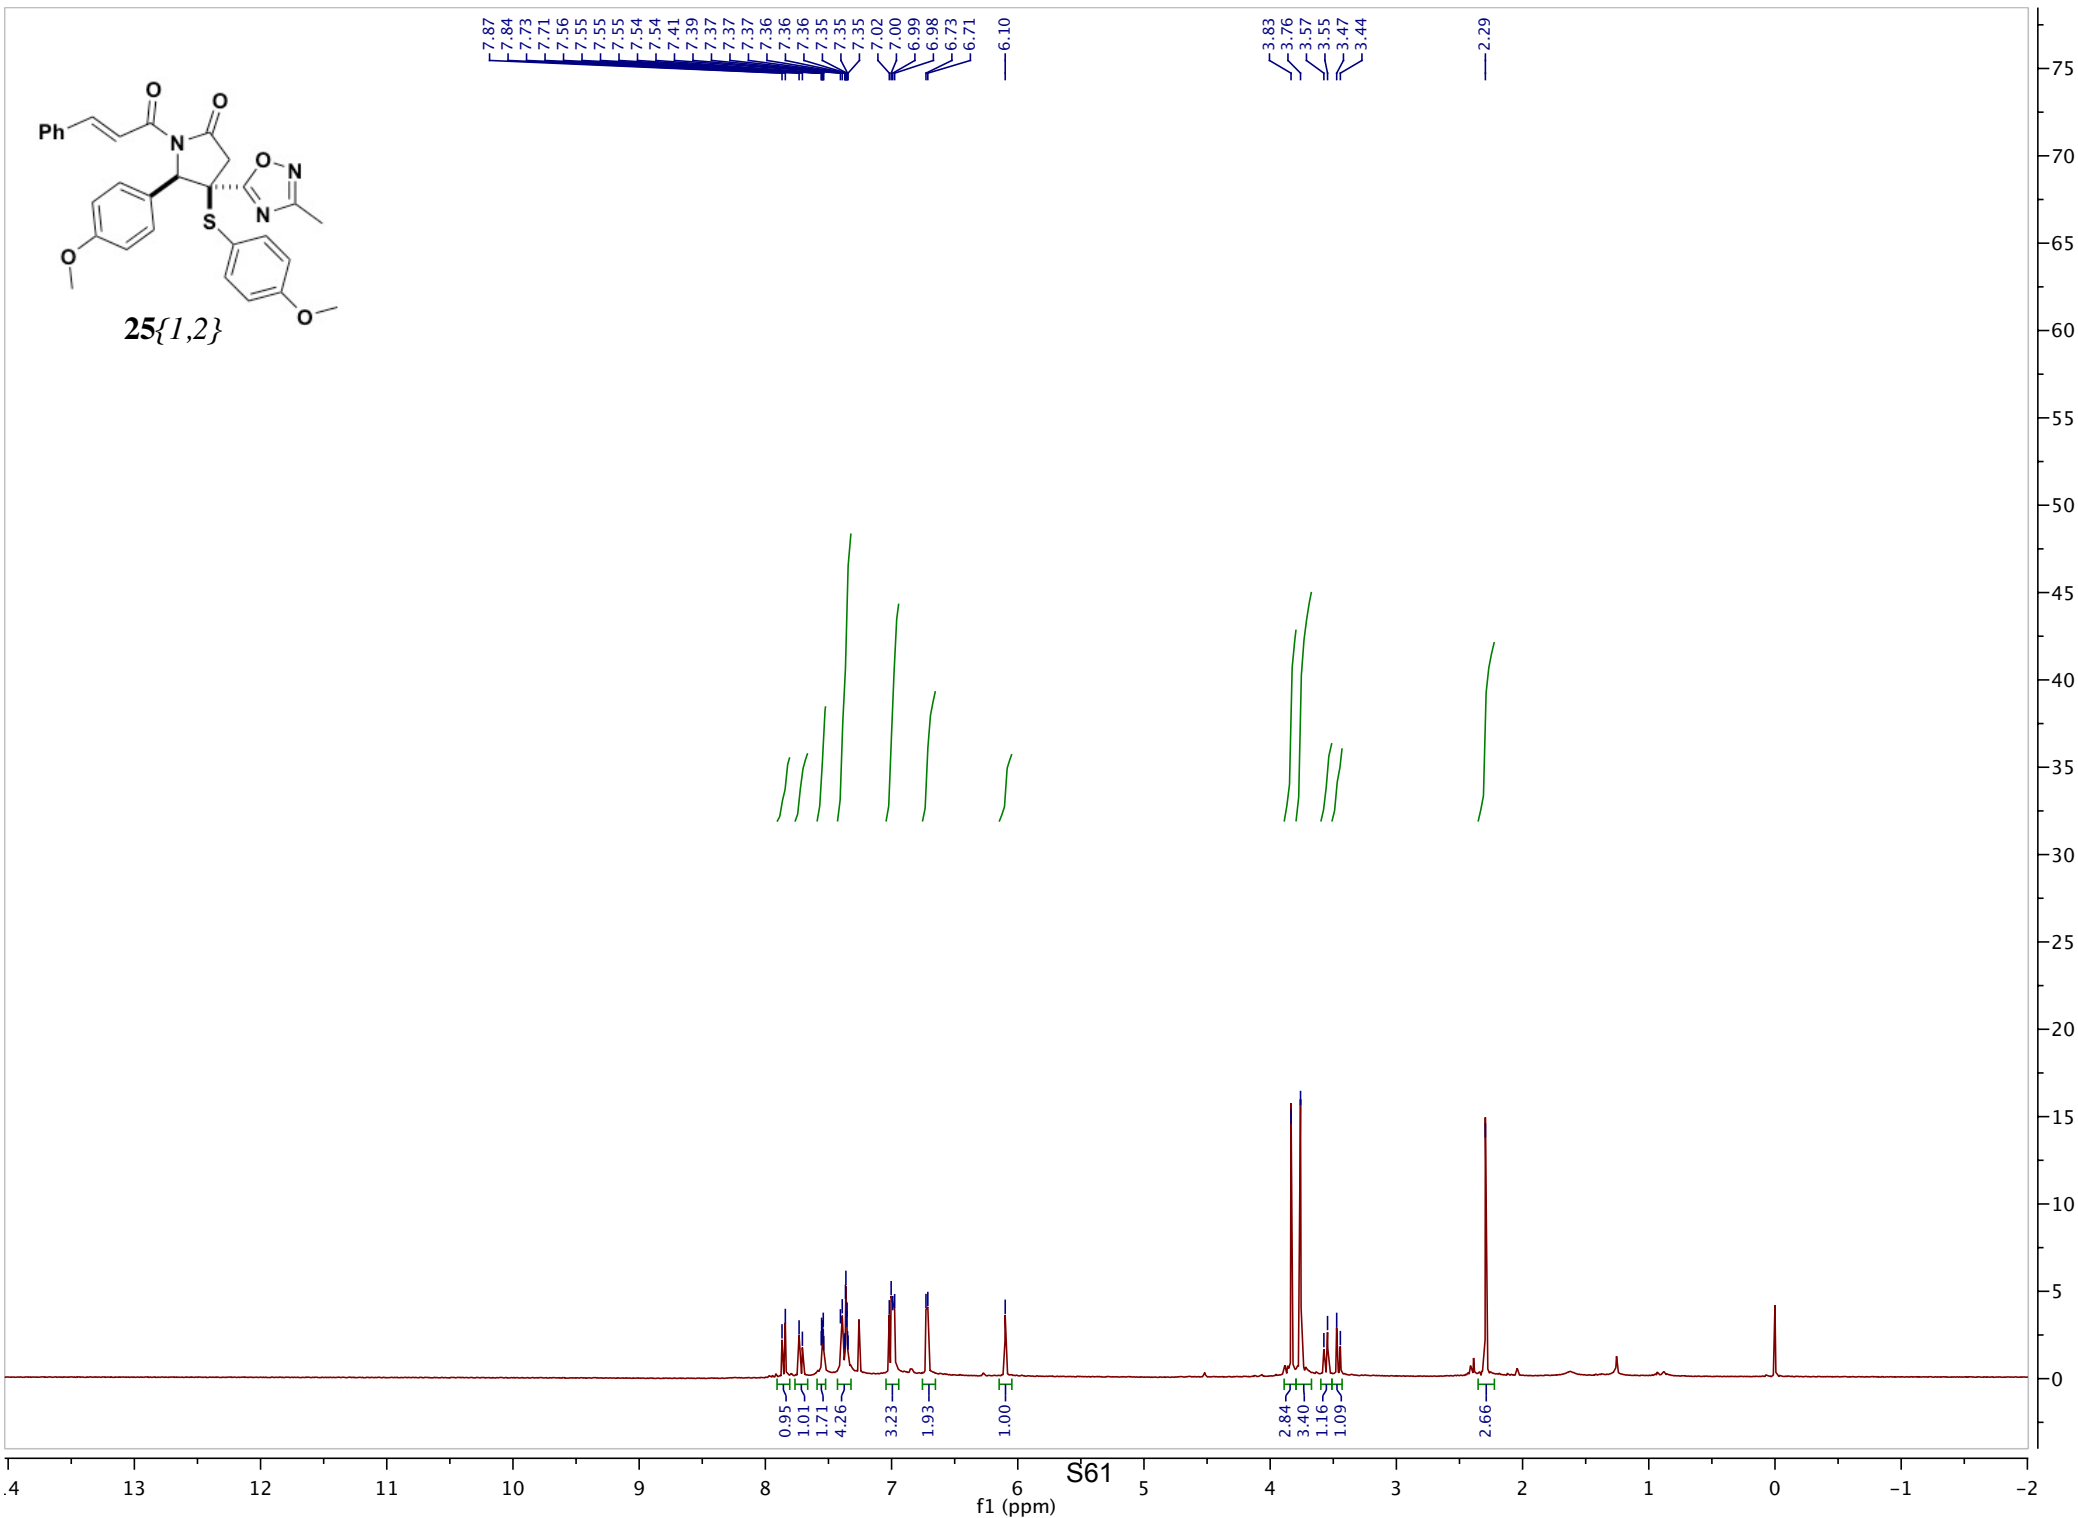

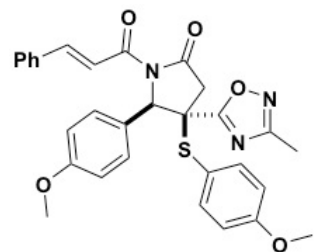

25{1,2}

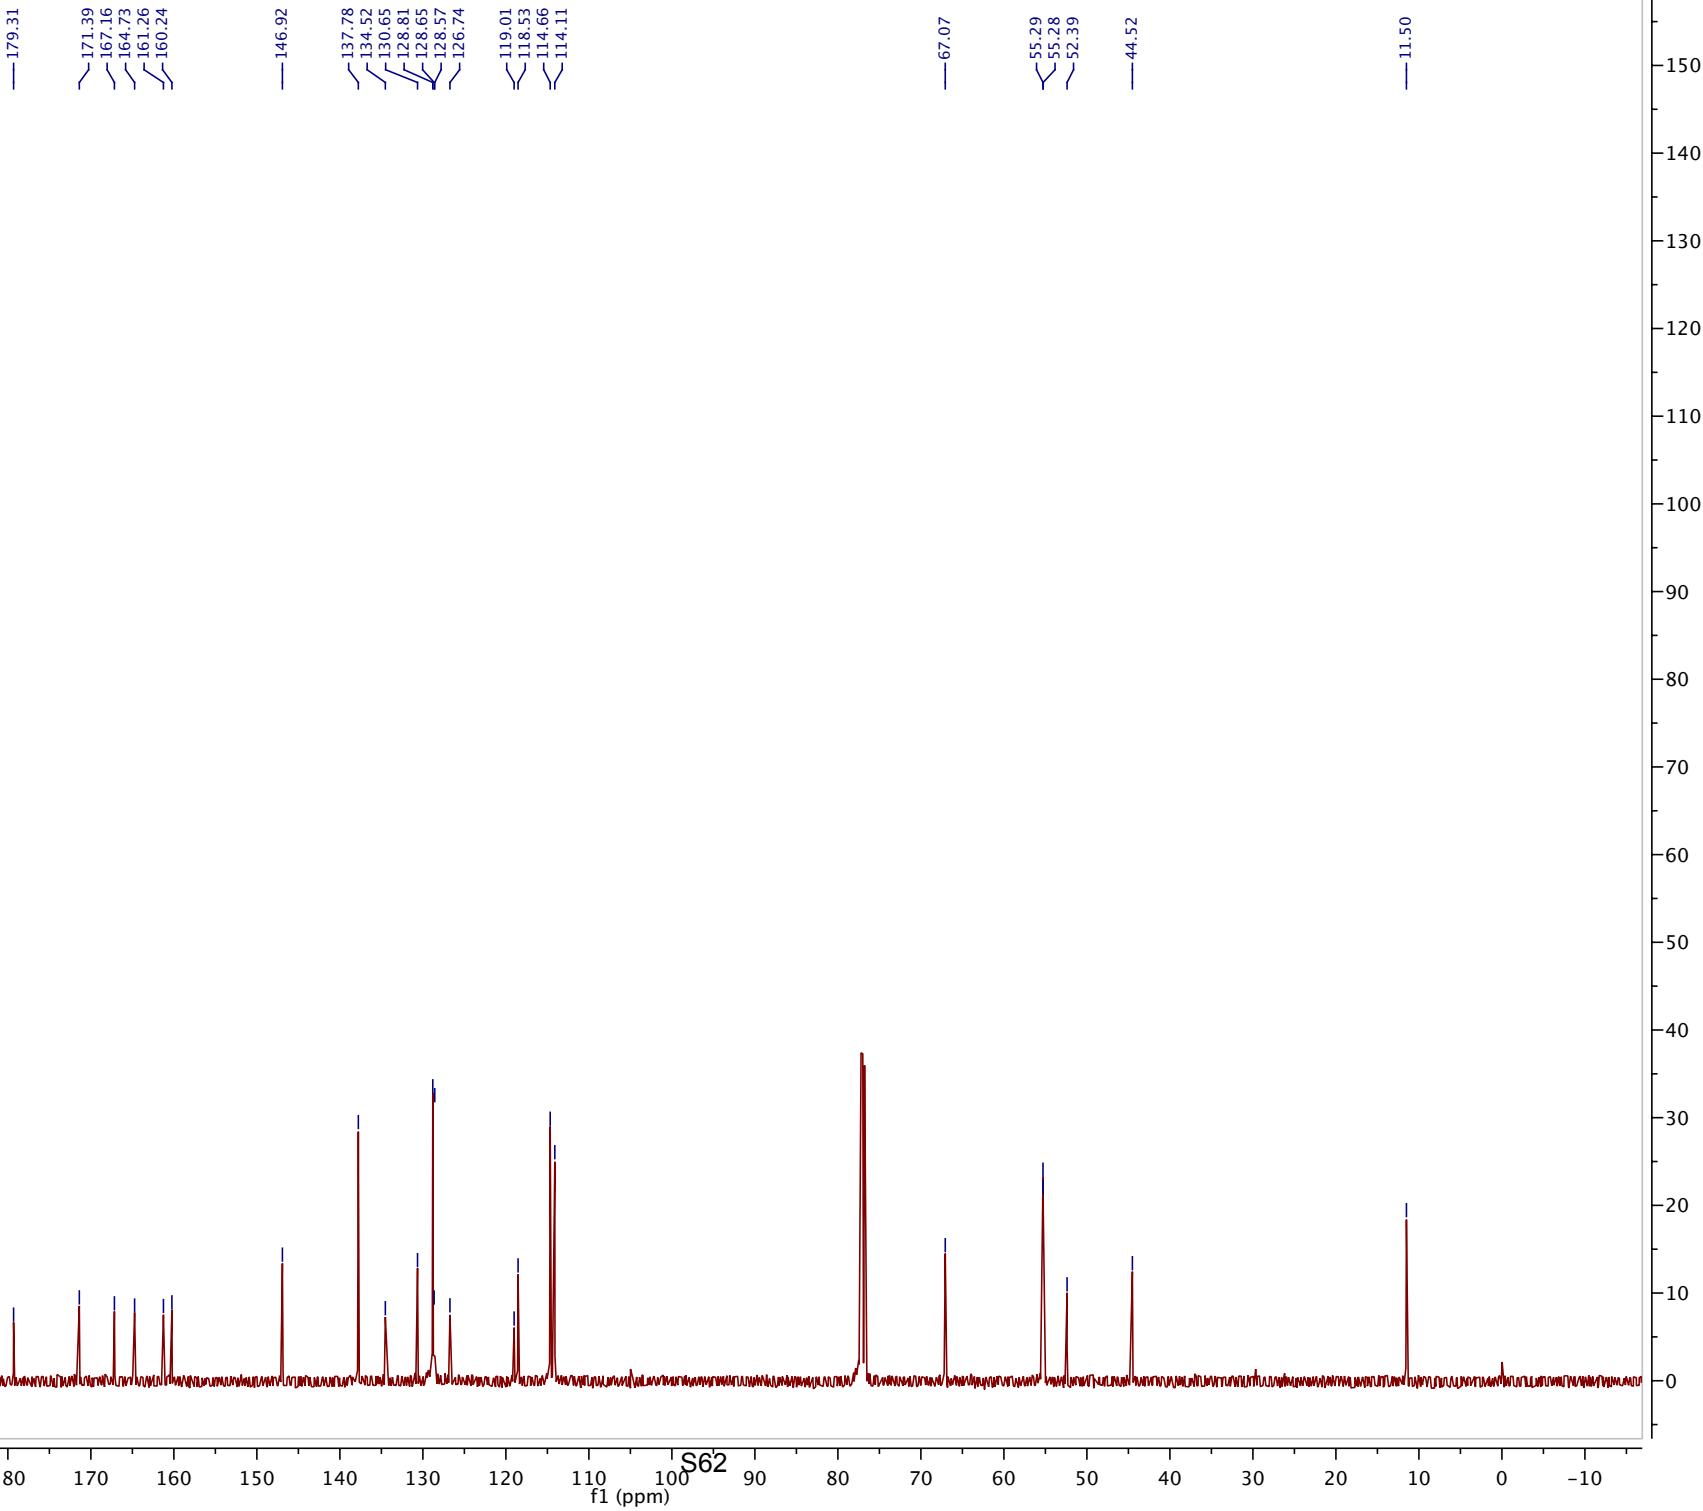

## X-Ray Crystallography

18{1}

A colorless block with approximate orthogonal dimensions 0.38 x 0.24 x 0.22mm<sup>3</sup> was placed and optically centered on the Bruker Duo APEXII<sup>1</sup> CCD system at 90(2)K. The initial unit cell was indexed using a least-squares analysis of a random set of reflections collected from three series of 0.5° wide  $\omega$ -scans, 10 seconds per frame, and 30 frames per series that were well distributed in reciprocal space. Five  $\omega$ -scan data frame series were collected [MoK $\alpha$ ] with 0.3° wide scans, 20 seconds per frame and 606 frames were collected, at varying phi angles ( $\phi=0^\circ, 72^\circ, 144^\circ, 216^\circ, 288^\circ$ ), for each series. The crystal to detector distance was 4.96cm, thus providing a complete sphere of data with processing to  $2\theta_{\max}=61.02^\circ$ .

### Structural determination and Refinement:

All crystallographic calculations were performed on an iMac with an Intel Core i7 2.80GHz processor and 8GB of extended memory at 1067MHz DDR3. A total of 41440 reflections were collected and corrected for Lorentz and polarization effects in SAINT<sup>1</sup> and absorption using crystal faces and Blessing's method as incorporated into the program SADABS<sup>2,3,4</sup> with 6715 unique. The SHELXTL<sup>5</sup> program package was implemented to determine the probable space group and set up the initial files. System symmetry, systematic absences and intensity statistics indicated the non-centrosymmetric orthorhombic space group Pna2<sub>1</sub> (no. 33). The structure was determined by direct methods with the successful location of the molecule using the program XS<sup>6</sup>. The structure was refined with XL<sup>6</sup>. The data collected were merged, based upon identical indices to 24273 data [R(int)=0.0151], truncated to  $2\theta_{\max}=60.00^\circ$  to 22029 data and then in least-squares refinement to 5830 unique data [R(int)=0.0159]. All non-hydrogen atoms were refined anisotropically. All hydrogen atoms were initially idealized and then allowed to refine freely throughout the final refinement process. The final structure was refined to convergence with R(F)=2.40%, wR(F<sup>2</sup>)=6.19%, GOF=1.053 for all 5830 unique reflections [R(F)=2.34%, wR(F<sup>2</sup>)=6.14% for those 5727 data with  $F_o > 4\sigma(F_o)$ ]. The final difference-Fourier map was featureless indicating that the structure is both correct

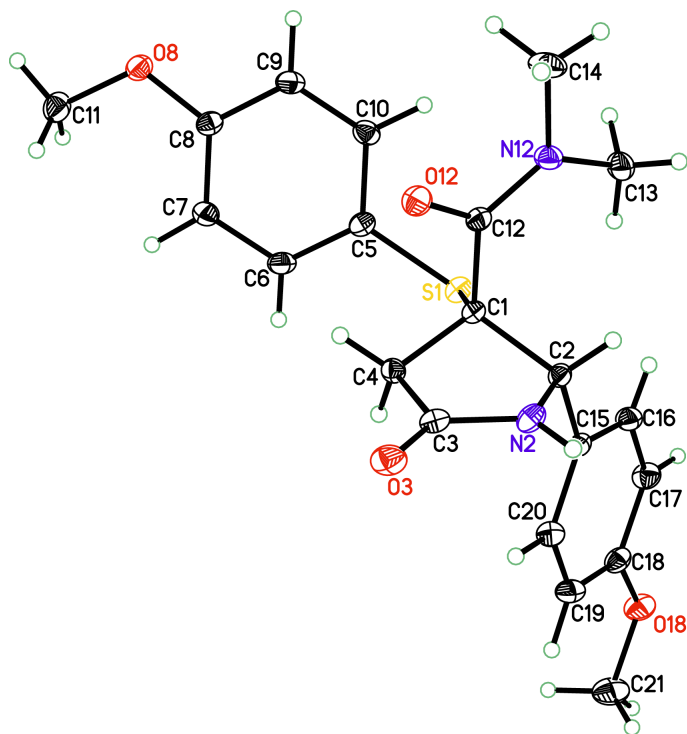

and complete. The absolute structure parameters, Flack(x)<sup>7</sup>, was refined and found to be -0.02(3) while the Hooft<sup>8</sup> parameter is -0.02(1) indicating that the structure's absolute configuration has been reliably determined. An empirical correction for extinction was also attempted but found to be negative and therefore not applied.

#### References:

1. Bruker (2010) APEX (Version 2010-9) and (2009) SAINT (Version 7.68a). Bruker AXS Inc., Madison, Wisconsin, USA.
2. An Empirical Correction for Absorption Anisotropy, Blessing, R. H. (1995). *Acta Cryst.*, A51, 33-38.
3. Sheldrick, G.M., SADABS (2008) Version 2008/1, 'Siemens Area Detector Absorption Correction' Universität Göttingen: Göttingen, Germany.
4. A short history of SHELX, George M. Sheldrick, *Acta Cryst.* (2008). A64, 112-122
5. Sheldrick, G.M., (2002). SHELXTL. Version 6.1. Bruker AXS Inc., Madison, Wisconsin, USA.
6. Sheldrick, G. M., (1997). SHELXS97 and SHELXL97. Universität Göttingen: Göttingen, Germany.
7. On Enantiomorph-Polarity Estimation, Flack, H.D. (1983). *Acta Cryst.*, A39, 876-881.
8. Hooft, R.W.W, Straver, L.H. & Spek, A.L. (2008). *J. Appl. Cryst.* 41, 96-103. Thompson, A.L. & Watkin, D.J. (2009). *Tetrahedron*



### X-ray data for 19{3,3}

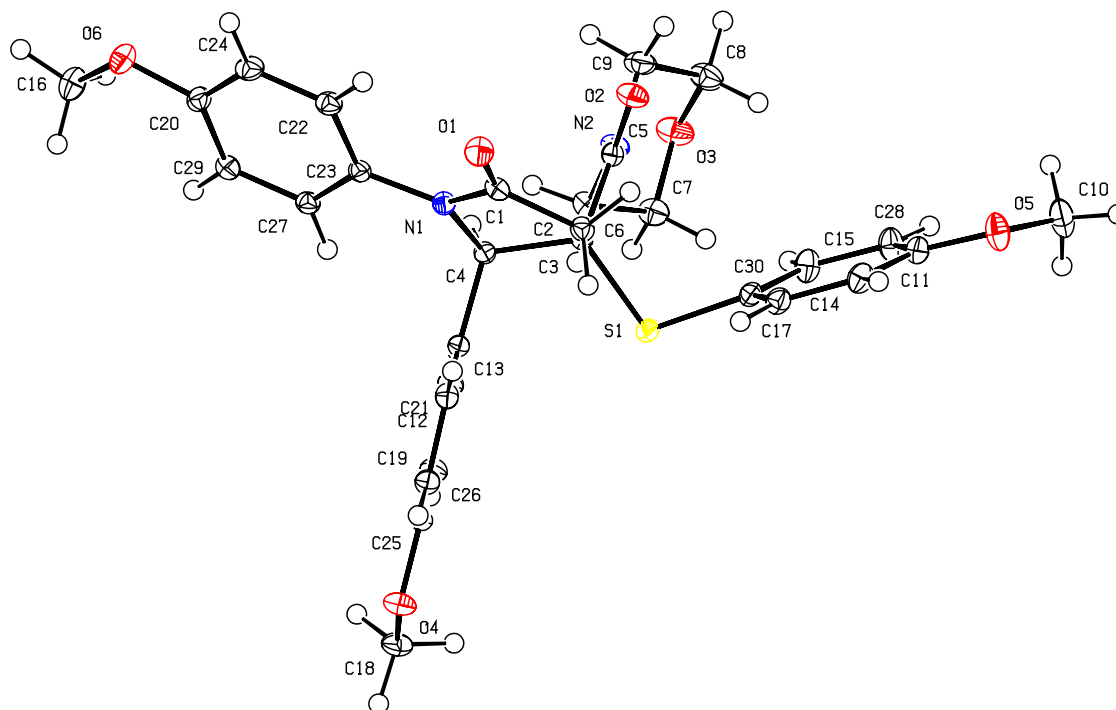

X-ray crystal structure of MD3index 19{3,3}. Thermal displacement plot shows 50% probability displacement ellipsoids for non-hydrogens.

**Table 1.** Crystal data and structure refinement for MD3index

|                                       |                                                                 |
|---------------------------------------|-----------------------------------------------------------------|
| Identification code                   | MD3index                                                        |
| Empirical formula                     | C <sub>30</sub> H <sub>32</sub> N <sub>2</sub> O <sub>6</sub> S |
| Formula weight                        | 548.63                                                          |
| Temperature/K                         | 90 (2) K                                                        |
| Crystal system                        | orthorhombic                                                    |
| Space group                           | P2 <sub>1</sub> 2 <sub>1</sub> 2 <sub>1</sub>                   |
| a/Å                                   | 11.9146(5)                                                      |
| b/Å                                   | 13.9399(6)                                                      |
| c/Å                                   | 16.1772(7)                                                      |
| α/°                                   | 90                                                              |
| β/°                                   | 90                                                              |
| γ/°                                   | 90                                                              |
| Volume/Å <sup>3</sup>                 | 2686.8(2)                                                       |
| Z                                     | 4                                                               |
| ρ <sub>calc</sub> /mg/mm <sup>3</sup> | 1.356                                                           |
| m/mm <sup>-1</sup>                    | 0.168                                                           |
| F(000)                                | 1160.0                                                          |
| Crystal size/mm <sup>3</sup>          | 0.559 × 0.519 × 0.512                                           |
| 2θ range for data collection          | 5.824 to 55.068°                                                |

|                                             |                                                   |
|---------------------------------------------|---------------------------------------------------|
| Index ranges                                | -15 ≤ h ≤ 15, -18 ≤ k ≤ 18, -21 ≤ l ≤ 21          |
| Reflections collected                       | 29672                                             |
| Independent reflections                     | 6178[R(int) = 0.0512]                             |
| Data/restraints/parameters                  | 6178/0/355                                        |
| Goodness-of-fit on F <sup>2</sup>           | 1.046                                             |
| Final R indexes [I ≥ 2σ (I)]                | R <sub>1</sub> = 0.0254, wR <sub>2</sub> = 0.0673 |
| Final R indexes [all data]                  | R <sub>1</sub> = 0.0265, wR <sub>2</sub> = 0.0680 |
| Largest diff. peak/hole / e Å <sup>-3</sup> | 0.26/-0.17                                        |

### References:

1. Bruker APEX (Version 2010-11.3) for NT26, and 2010 SAINT (Version 7.68a). Bruker AXS Inc., Madison, Wisconsin, USA.
2. An Empirical Correction for Absorption Anisotropy, Blessing, R. H. (1995). *Acta Cryst.*, A51, 33-38.
3. Sheldrick, G.M., SADABS (2008) Version 2008/2, 'Siemens Area Detector Absorption Correction' Universität Göttingen: Göttingen, Germany.
4. O. V. Dolomanov, L. J. Bourhis, R. J. Gildea, J. A. K. Howard and H. Puschmann, OLEX2: a complete structure solution, refinement and analysis program. *J. Appl. Cryst.* (2009). 42, 339-341.
5. XS, G.M. Sheldrick, *Acta Cryst.* (2008). A64, 112-122
6. XL, G.M. Sheldrick, *Acta Cryst.* (2008). A64, 112-122

## 20{3,6}

A colorless block with approximate orthogonal dimensions 0.38 x 0.33 x 0.25mm<sup>3</sup> was placed and optically centered on the Bruker APEXII<sup>1</sup> CCD diffractometer at -183°C. The initial unit cell was indexed using a least-squares analysis of a random set of reflections collected from three series of 0.3° wide  $\omega$ -scans, 10 seconds per frame, and 30 frames per series that were well distributed in reciprocal space. Four  $\omega$ -scan data frame series were collected [MoK $\alpha$ ] with 0.3° wide scans, 25 seconds per frame and 606, 455, 606, 455 frames collected per series at varying  $\phi$  angles ( $\phi=0^\circ, 90^\circ, 180^\circ, 270^\circ$ ), respectively. The crystal to detector distance was 5.23cm, thus providing a complete sphere of data to  $2\theta_{\max}=54.97^\circ$ .

### Structural determination and Refinement:

All crystallographic calculations were performed on an iMac with an Intel Core i7 2.80GHz processor and 8GB of extended memory at 1067MHz DDR3. A total of 28376 reflections were collected and corrected for Lorentz and polarization effects in Saint<sup>1</sup> and absorption using Blessing's method as incorporated into the program SADABS<sup>2,3,5</sup> with 5963 unique. The SHELXTL<sup>4</sup> program package was implemented to determine the probable space group and set up the initial files. System symmetry, systematic absences and intensity statistics indicated the centrosymmetric, non-standard, monoclinic space group P2<sub>1</sub>/n (no. 14). The structure was determined by direct methods with the successful location of a majority of the non-hydrogen atoms comprising the molecule using the program XS<sup>5</sup>. The structure was refined with XL<sup>5</sup>. The 28376 data collected were merged, based upon identical indices yielding 21519 data [R(int)=0.0108], and during least-squares refinement to 5668 unique data [R(int)=0.0149]. A single least-squares difference-Fourier cycle was required to locate the remaining non-hydrogen atoms. One larger than normal peak was also located near O(14) and its inclusion necessitated that a partial occupancy group be created. The final ratio was determined to be 0.96:0.04. All non-hydrogen atoms were refined anisotropically. Full occupancy hydrogen atoms were refined freely while the 96:04 disordered pair was idealized throughout. The final structure was refined to convergence with R(F)=3.38%, wR(F<sup>2</sup>)=8.18%, GOF=1.026 for all 5668 unique reflections [R(F)=3.09%, wR(F<sup>2</sup>)=7.92% for those 5213 data with Fo > 4 $\sigma$ (Fo)]. The final difference-Fourier map was featureless indicating that the structure is both correct

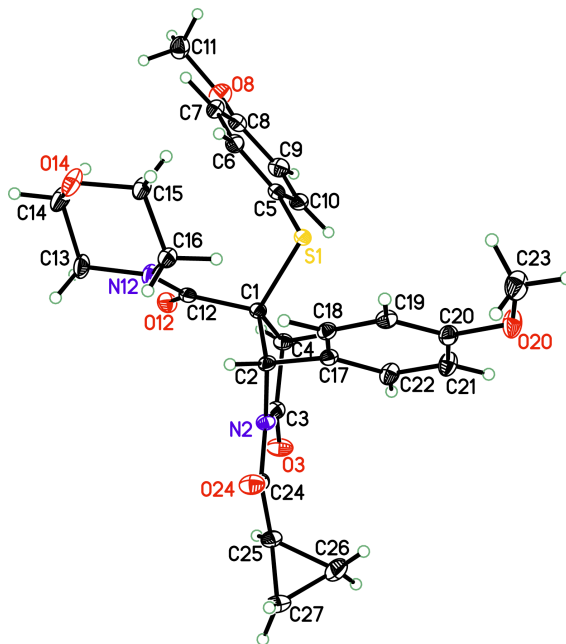

and complete. An empirical correction was found to be negative and therefore not applied.

References:

1. Bruker APEXII (Version 2012.2-0) and (2012) SAINT (Version 8.18C). Bruker AXS Inc., Madison, Wisconsin, USA.
2. An Empirical Correction for Absorption Anisotropy, Blessing, R. H. (1995). *Acta Cryst.*, A51, 33-38.
3. Sheldrick, G.M., SADABS (2008/1), 'Siemens Area Detector Absorption Correction' Universität Göttingen: Göttingen, Germany.
4. Sheldrick, G.M., (2002). SHELXTL. Version 6.1. Bruker AXS Inc., Madison, Wisconsin, USA.
5. A short history of SHELX, George M. Sheldrick, *Acta Cryst.* (2008). A64, 112-122

20{3,6}

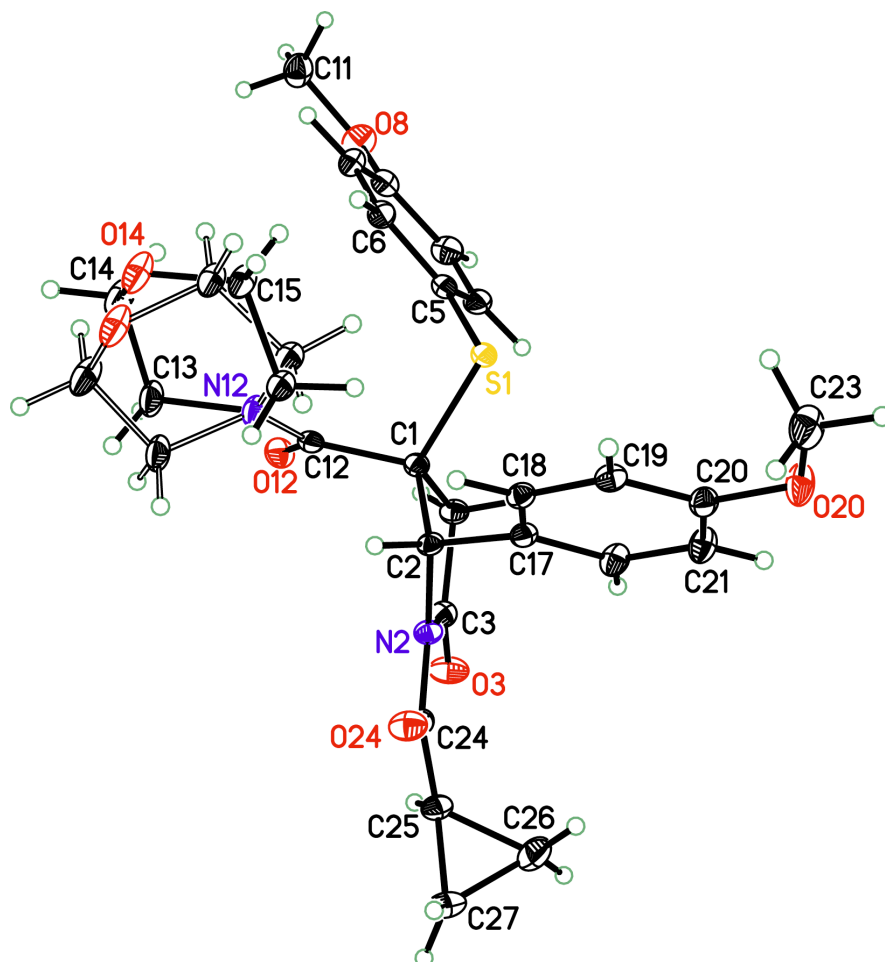

### 30{3} syn

A colorless plate with approximate orthogonal dimensions 0.60 x 0.60 x 0.09mm<sup>3</sup> was placed and optically centered on the Bruker Duo<sup>1</sup> APEXII CCD diffractometer at -183°C. The initial unit cell was indexed using a least-squares analysis of a random set of reflections collected from three series of 0.5° wide  $\omega$ -scans, 10 seconds per frame, and 30 frames per series that were well distributed in reciprocal space. Twelve  $\omega$  and phi-scan data frame series were collected [CuK $\alpha$ ] with 0.5° wide scans and variable frame times based upon diffraction angle. The crystal to detector distance was 4.96cm, thus providing a nearly complete sphere of data with processing to  $2\theta_{\max}=136.48^\circ$ .

#### Structural determination and Refinement:

All crystallographic calculations were performed on an iMac with 2.80GHz quad core processor and 8GB of extended memory. A total of 11404 reflections were collected and corrected for Lorentz and polarization effects in SAINT<sup>1</sup> and absorption using Blessing's method as incorporated into the program SADABS<sup>2,3,5</sup> with 3326 unique. The SHELXTL<sup>4</sup> program package was implemented to determine the probable space group and set up the initial files. System symmetry, systematic absences and intensity statistics indicated the centrosymmetric monoclinic space group C2/c (no. 15). The structure was determined by direct methods with the successful location of a majority of the non-hydrogen atoms comprising the molecule using the program XS<sup>5</sup>. The structure was refined with XL<sup>5</sup>. The 11404 data collected were merged, based upon identical indices to 7734 data [R(int)=0.0281] and truncated to  $2\theta=136.46^\circ$ , 7381 data, and further merged during least-squares refinement to 3023 unique data [R(int)=0.0230]. A series of least-squares difference-Fourier cycle were required to locate the remaining non-hydrogen atoms comprising the molecule and severely disordered solvent. Due to overall solvent disorder and believed to be a methanol molecule, squeeze<sup>6</sup> was used to remove this solvent density from further consideration. All

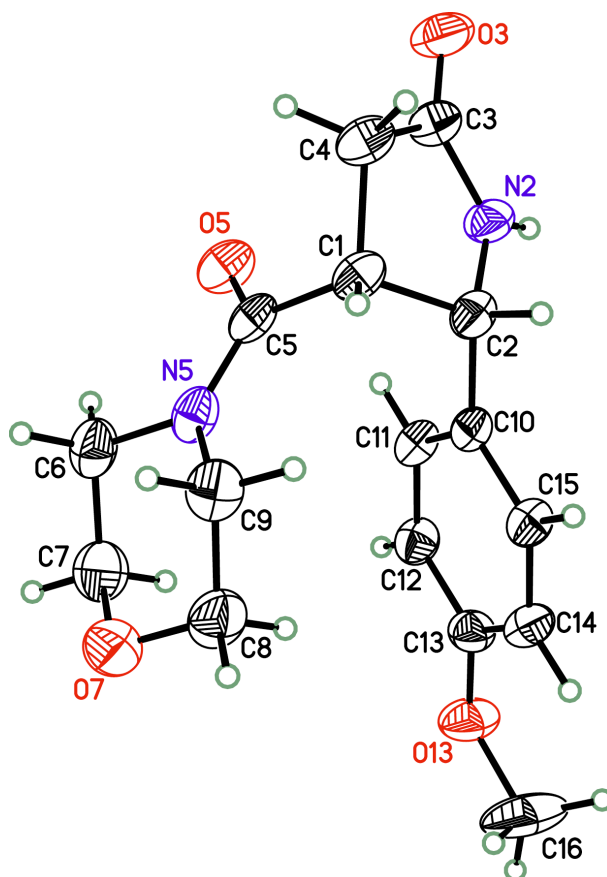

non-hydrogen atoms were refined anisotropically. Hydrogen atoms were idealized throughout the final convergence phase. The final structure was refined to convergence with  $R(F)=5.16\%$ ,  $wR(F^2)=14.21\%$ ,  $GOF=1.037$  for all 3023 unique reflections [ $R(F)=4.99\%$ ,  $wR(F^2)=14.06\%$  for those 2851 data with  $F_o > 4\sigma(F_o)$ ]. The final difference-Fourier map was featureless indicating that the structure is both correct and complete. An empirical correction for extinction was also attempted and found to be negative and therefore not applied.

#### References:

1. Bruker (2002) APEXII (Version 2010-11.3) and (2009) SAINT (Version 7.68A). Bruker AXS Inc., Madison, Wisconsin, USA.
2. An Empirical Correction for Absorption Anisotropy, Blessing, R. H. (1995). *Acta Cryst.*, A51, 33-38.
3. Sheldrick, G.M., SADABS (2008/1), 'Siemens Area Detector Absorption Correction' Universität Göttingen: Göttingen, Germany.
4. Sheldrick, G.M., (2002). SHELXTL. Version 6.1. Bruker AXS Inc., Madison, Wisconsin, USA.
5. A short history of SHELX, George M. Sheldrick, *Acta Cryst.* (2008). A64, 112-122.
6. PLATON: Spek, A.L. (2003), *J.Appl.Cryst.* 36, 7-13

Acknowledgment: We thank the National Science Foundation (Grant 0840444) for the Dual source X-ray diffractometer.

## Computational Analysis

### Shape Diversity

Procedure for generation of Ternary Plot:<sup>1,2</sup>

2D Simplified Molecular Input Line Entry Specification (SMILES) strings were generated using CambridgeSoft® ChemDraw®.<sup>3</sup> The strings were imported into Windows XP® Notepad and saved as a .smi files. The .smi files were converted to 3D structures using OpenEye Scientific Software, Inc., OMEGA-V2.4.3;(-ewindow 3.0 kcal/mol).<sup>4</sup> OMEGA was used to directly generate .xyz (Cartesian coordinates). Conformers >3 kcal/mol from the lowest energy conformer and duplicates were discarded. Conformers were estimated using Merks Molecular Force Field 94, MMFF94.<sup>5</sup> The Principal Moments of Inertia (PMI)<sup>3</sup> were calculated using the Perl module Math::MatrixReal.<sup>6</sup> Values at (1,1) correspond to spherical shapes (methane or adamantane), (0.5,0.5) disk shaped (benzene), and (0,1) rod shaped (acetylene).

### Graph of Diversity Analysis

Data for molecular weights, XLogP, # of H-bond donors, and # of H-bond acceptors obtained from FILTER.<sup>4</sup>

### References

1. Sauer, W. H. B.; Schwarz, M. K. J. Chem. Inf. Comput. Sci. 2003, 43, 987-1003.
2. Guggenheim, K. G.; Butler, J. D.; Painter, P. P.; Lorsbach, B. A.; Tantillo, D. J.; Kurth, M. J. J. Org.Chem. 2011, 76, 5803-5812.
3. <http://www.cambridgesoft.com/>
4. For more information on OpenEye and OMEGA: <http://www.eyesopen.com/>
5. Halgren, T. A. J. Comput. Chem. 1996, 17, 520-552.
6. <http://www.cpan.org/modules/index.html>
